# Supplementary material for: New symmetrically substituted 1,3,5-triazines as host compounds for channel-type inclusion formation
Source: Royal Society of Chemistry journal article supplement (doi:10.1039/c2ce06034e), 2011-12-08

File:FPT\_1 Ident:16\_20-1\_4 Win 90PPM Acq: 2-NOV-2009 12:47:28 +1:06 Cal:CEIMS\_1000\_1  
AutoSpecQ EI+ Magnet BpM:121 BpI:5228721 TIC:61495804 Flags:HALL  
Sample Text:DCB Mass Spectrometry/Schuerch File Text:R. Berger FPT\_1

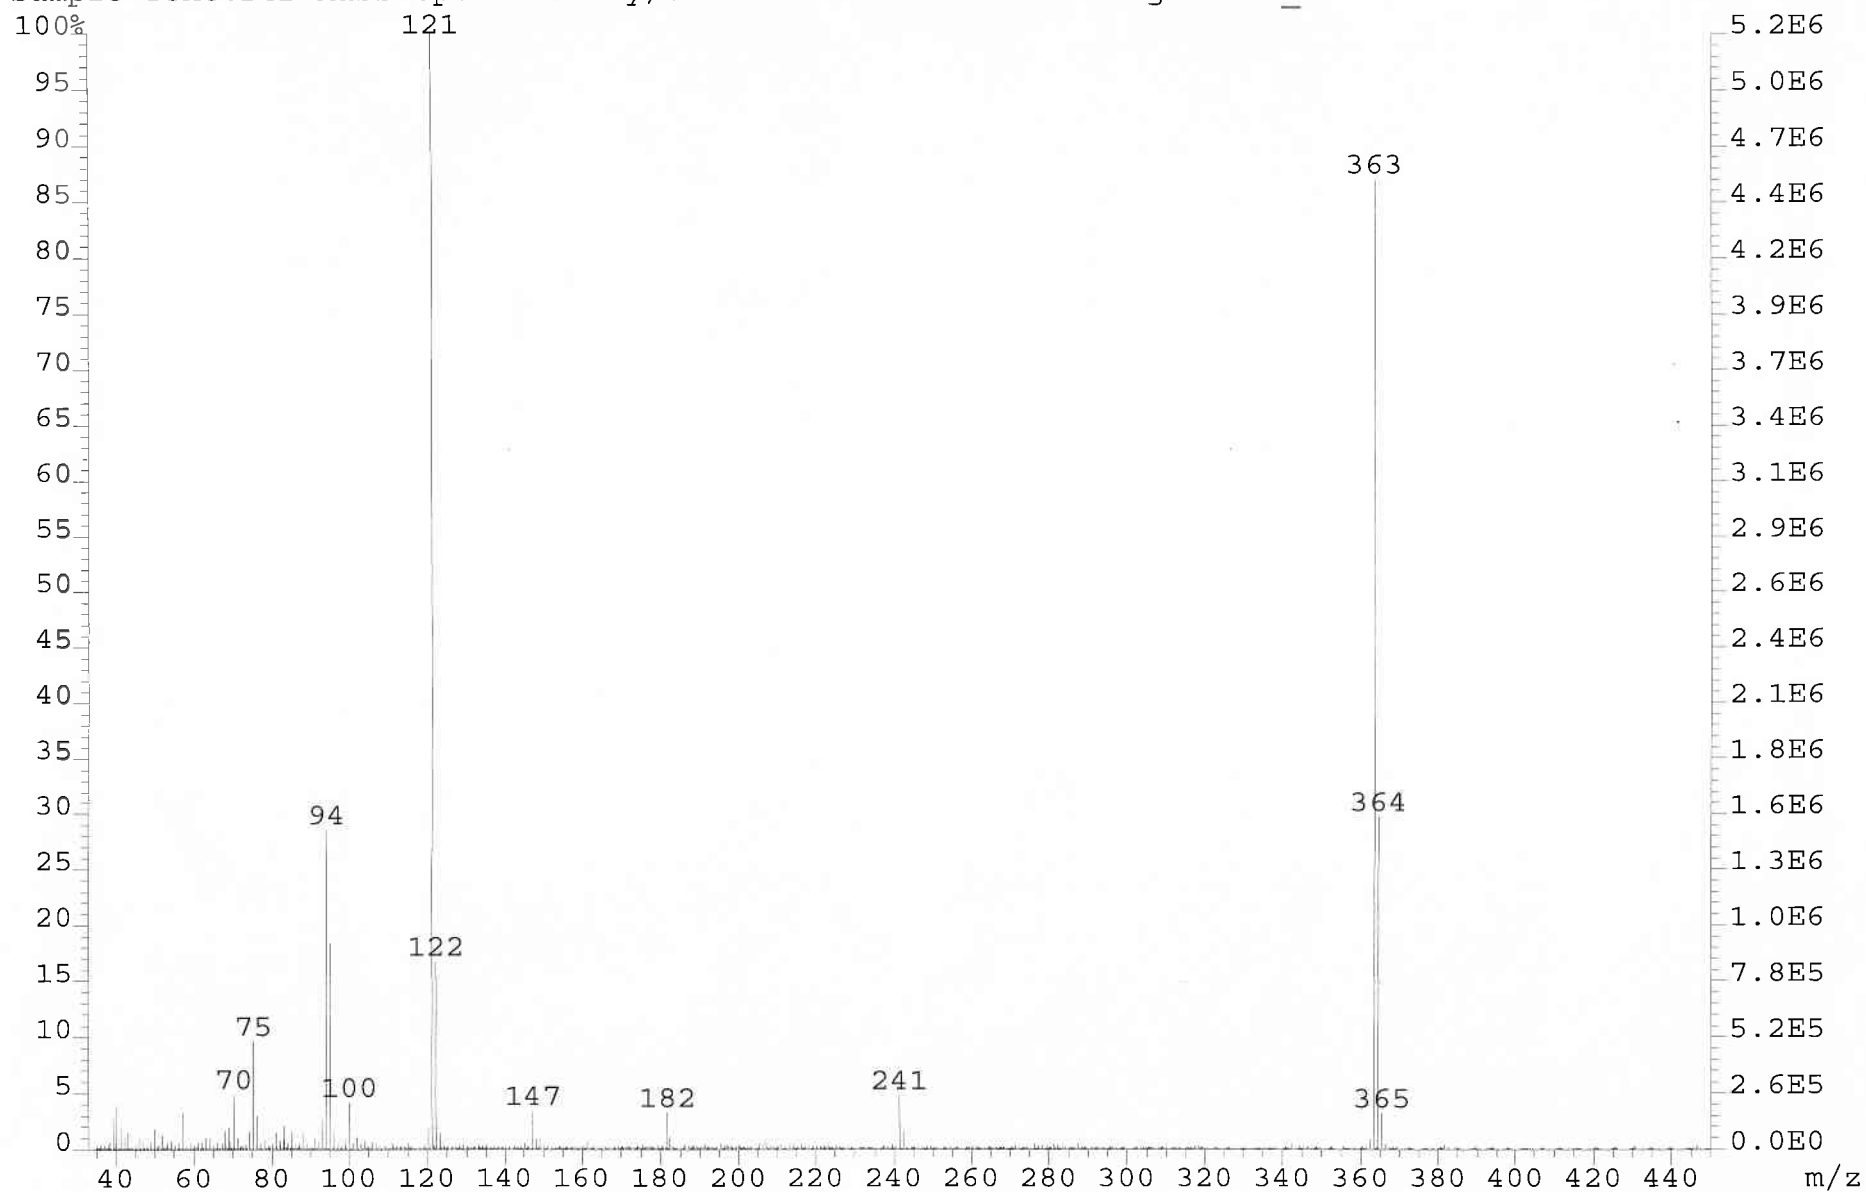

Supplement: c2ce06034e.zip [file 1-MS.pdf › 1-MS.pdf]
