# Supplementary material for: New symmetrically substituted 1,3,5-triazines as host compounds for channel-type inclusion formation
Source: Royal Society of Chemistry journal article supplement (doi:10.1039/c2ce06034e), 2011-12-08

File:BRPT\_5\_U Ident:55\_70-1\_9 Win 90PPM Acq: 9-SEP-2008 15:29:37 +3:40 Cal:CEIMS\_1000\_1  
AutoSpecQ\_EI+ Magnet BpM:545 BpI:17472034 TIC:274563360 Flags:HALL  
Sample Text:DCB Mass Spectrometry/Schuerch File Text:Berger BrPT\_5\_U

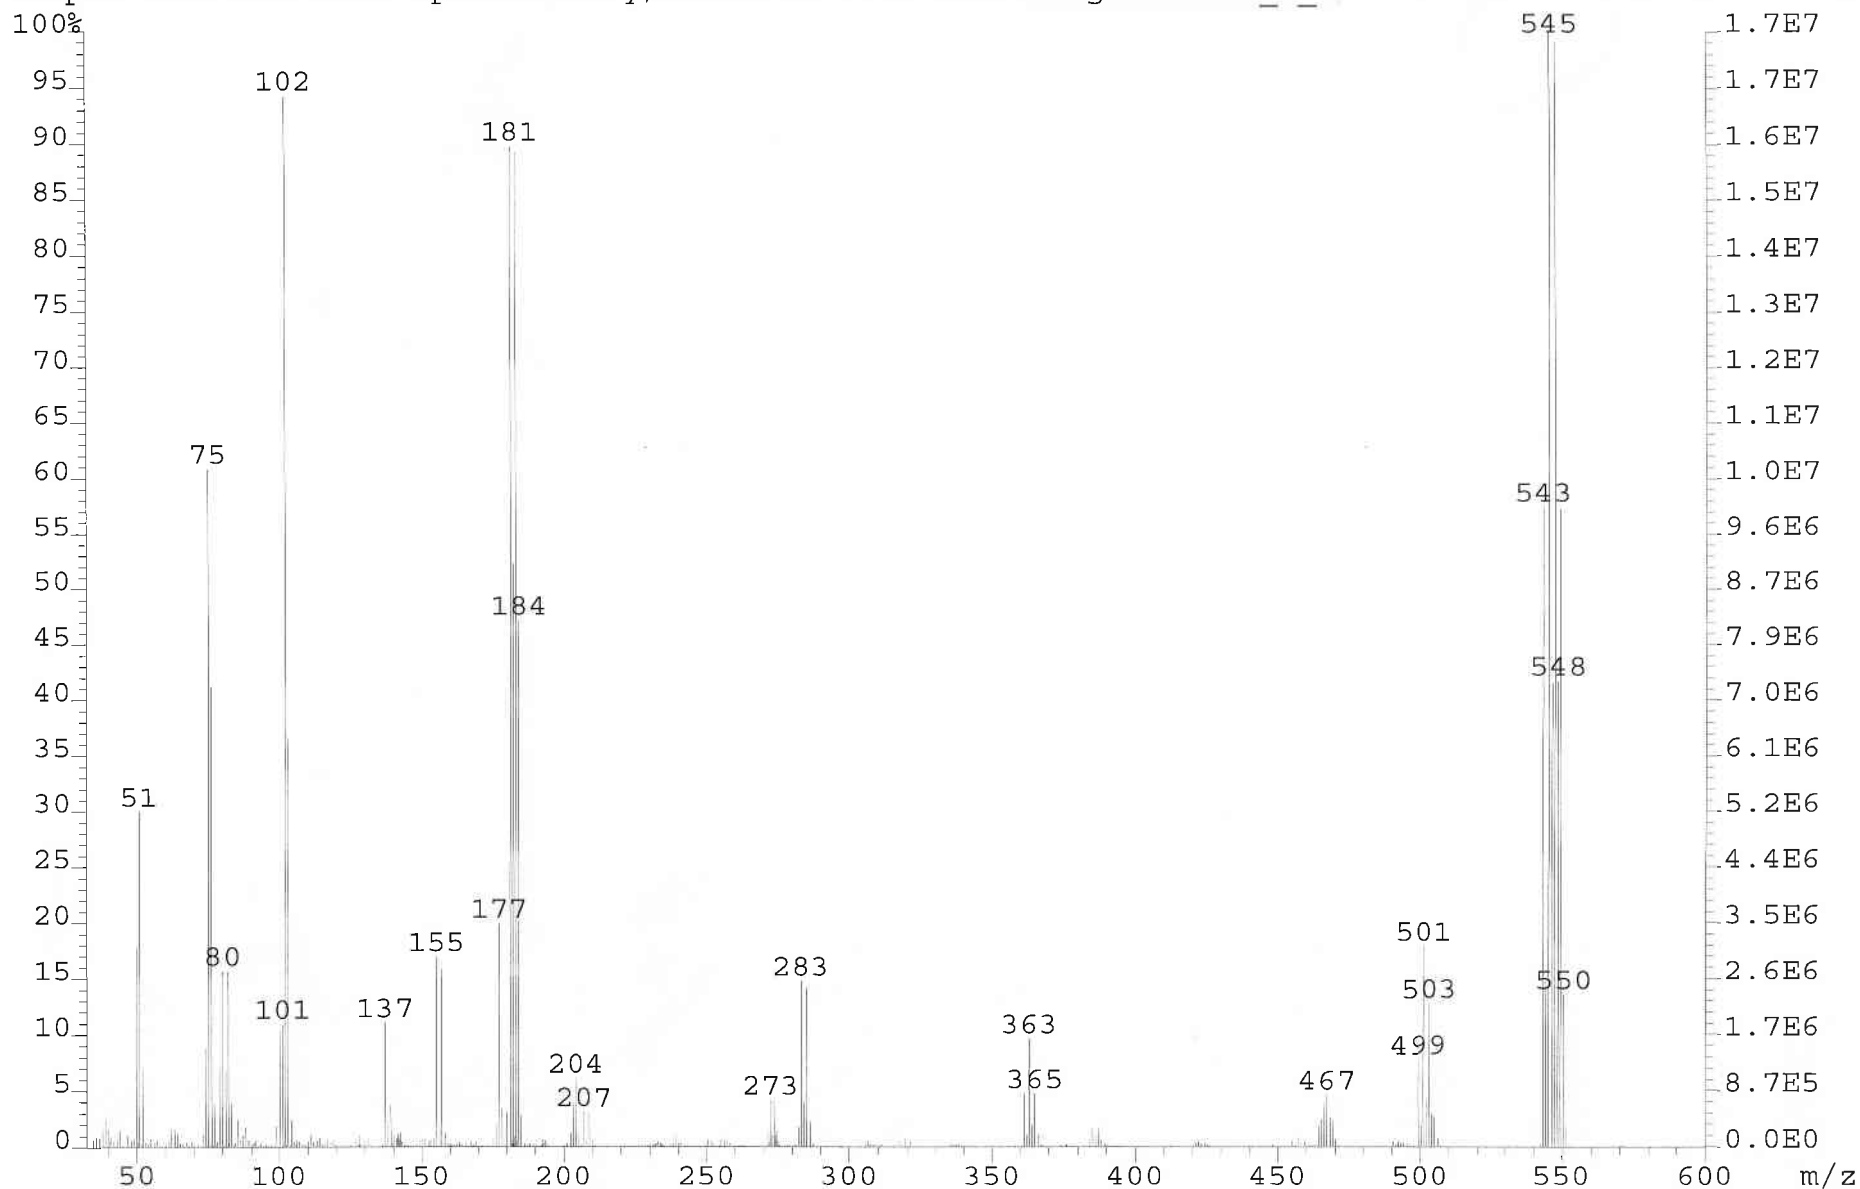

Supplement: c2ce06034e.zip [file 3-MS.pdf › 3-MS.pdf]
