# Supplementary material for: New symmetrically substituted 1,3,5-triazines as host compounds for channel-type inclusion formation
Source: Royal Society of Chemistry journal article supplement (doi:10.1039/c2ce06034e), 2011-12-08

File: IPT\_3 Ident: 26\_33-2\_4 Win 90PPM Acq: 12-NOV-2009 09:45:56 +1:43 Cal: CEIMS\_1000\_1  
AutoSpecQ EI+ Magnet BpM: 688 BpI: 14338089 TIC: 198198560 Flags: HALL  
Sample Text: DCB Mass Spectrometry/Schuerch File Text: R. Berger

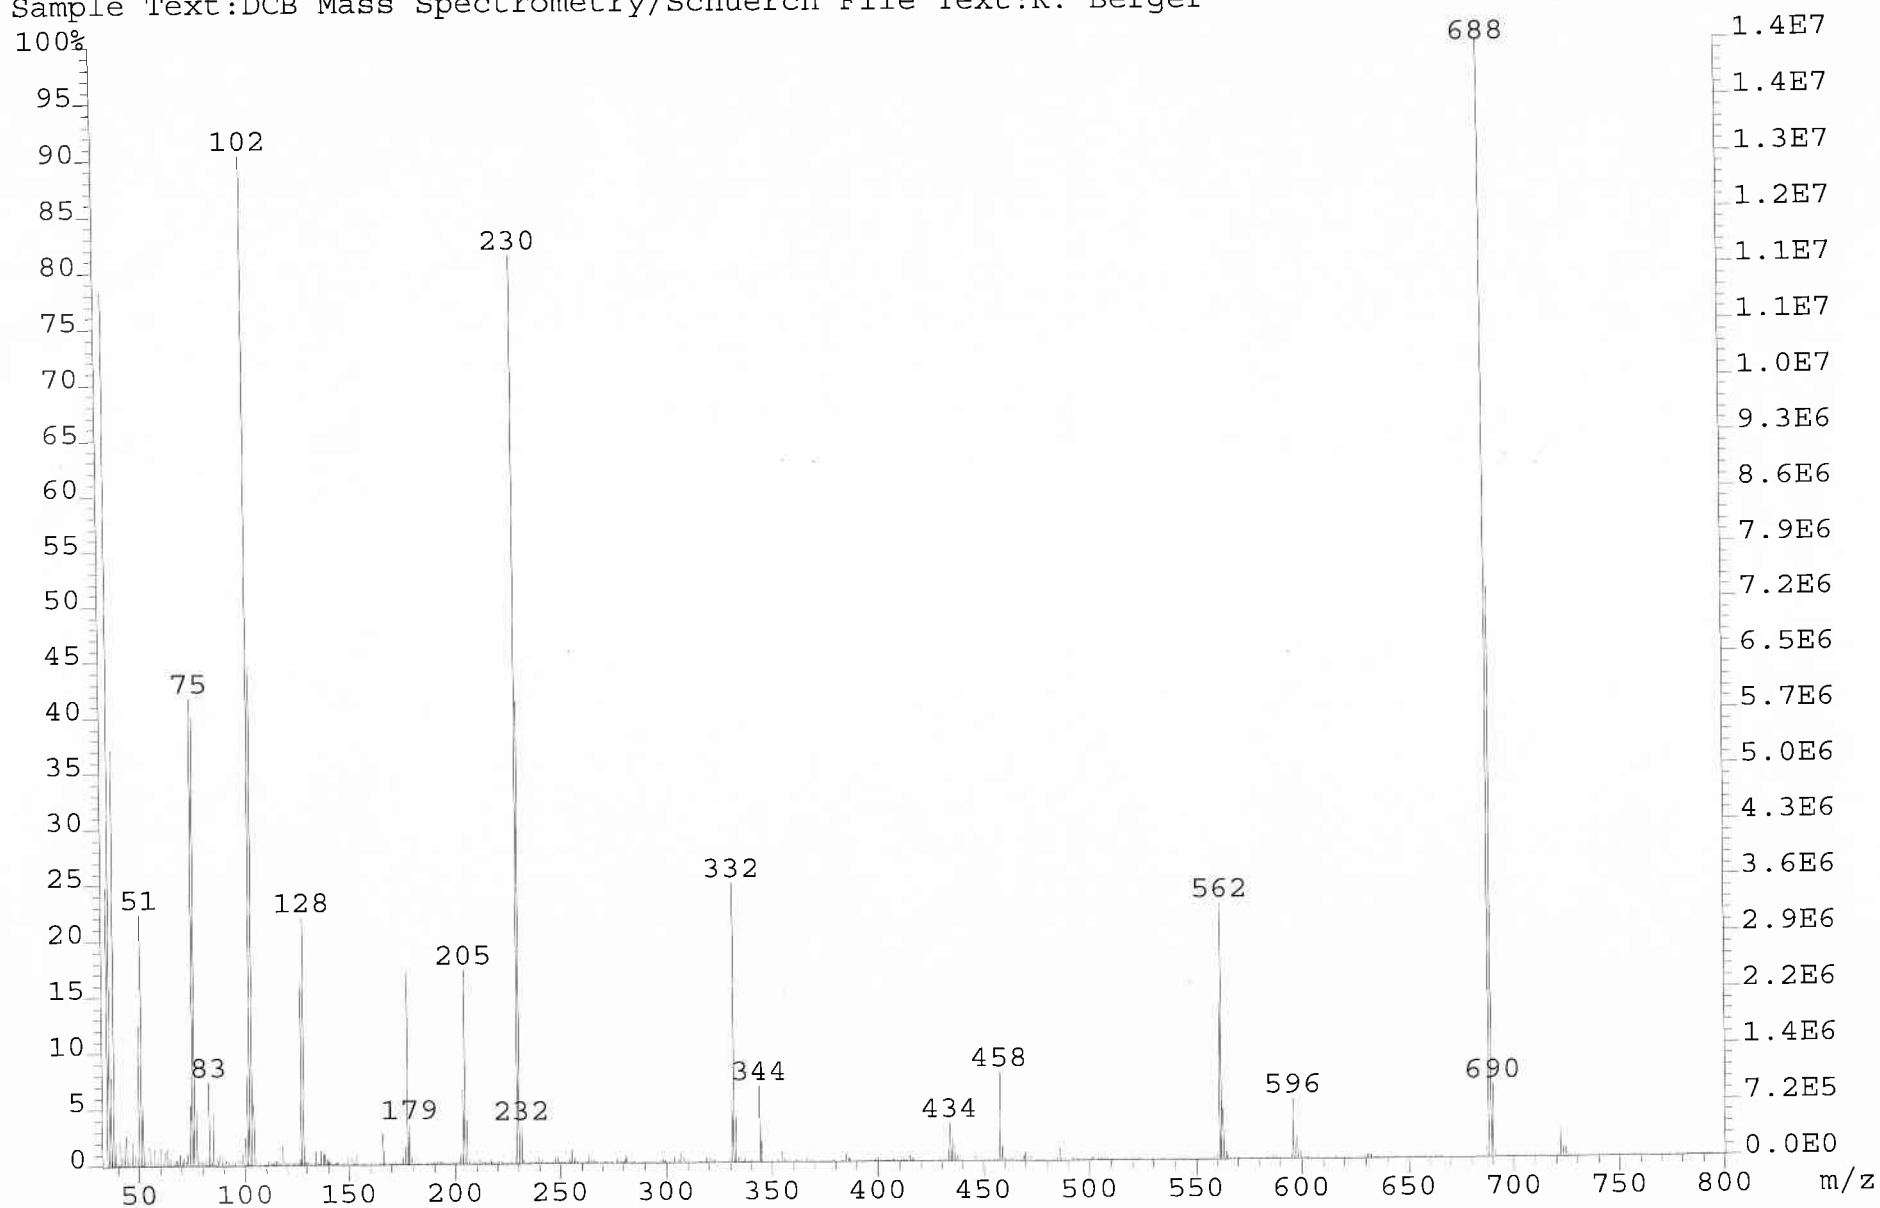

Supplement: c2ce06034e.zip [file 4-MS.pdf › 4-MS.pdf]
