# Supplementary material for: New symmetrically substituted 1,3,5-triazines as host compounds for channel-type inclusion formation
Source: Royal Society of Chemistry journal article supplement (doi:10.1039/c2ce06034e), 2011-12-08

BFPT

File: Ident:44\_123-2\_9 Win 90PPM Acq:11-MAY-2010 08:23:01 +4:52 Cal:CEIMS\_1000\_1  
AutoSpecQ EI+ Magnet BpM:201 BpI:1045378 TIC:36012448 Flags:HALL  
Sample Text:DCB Mass Spectrometry/Schuerch File Text:R. Berger

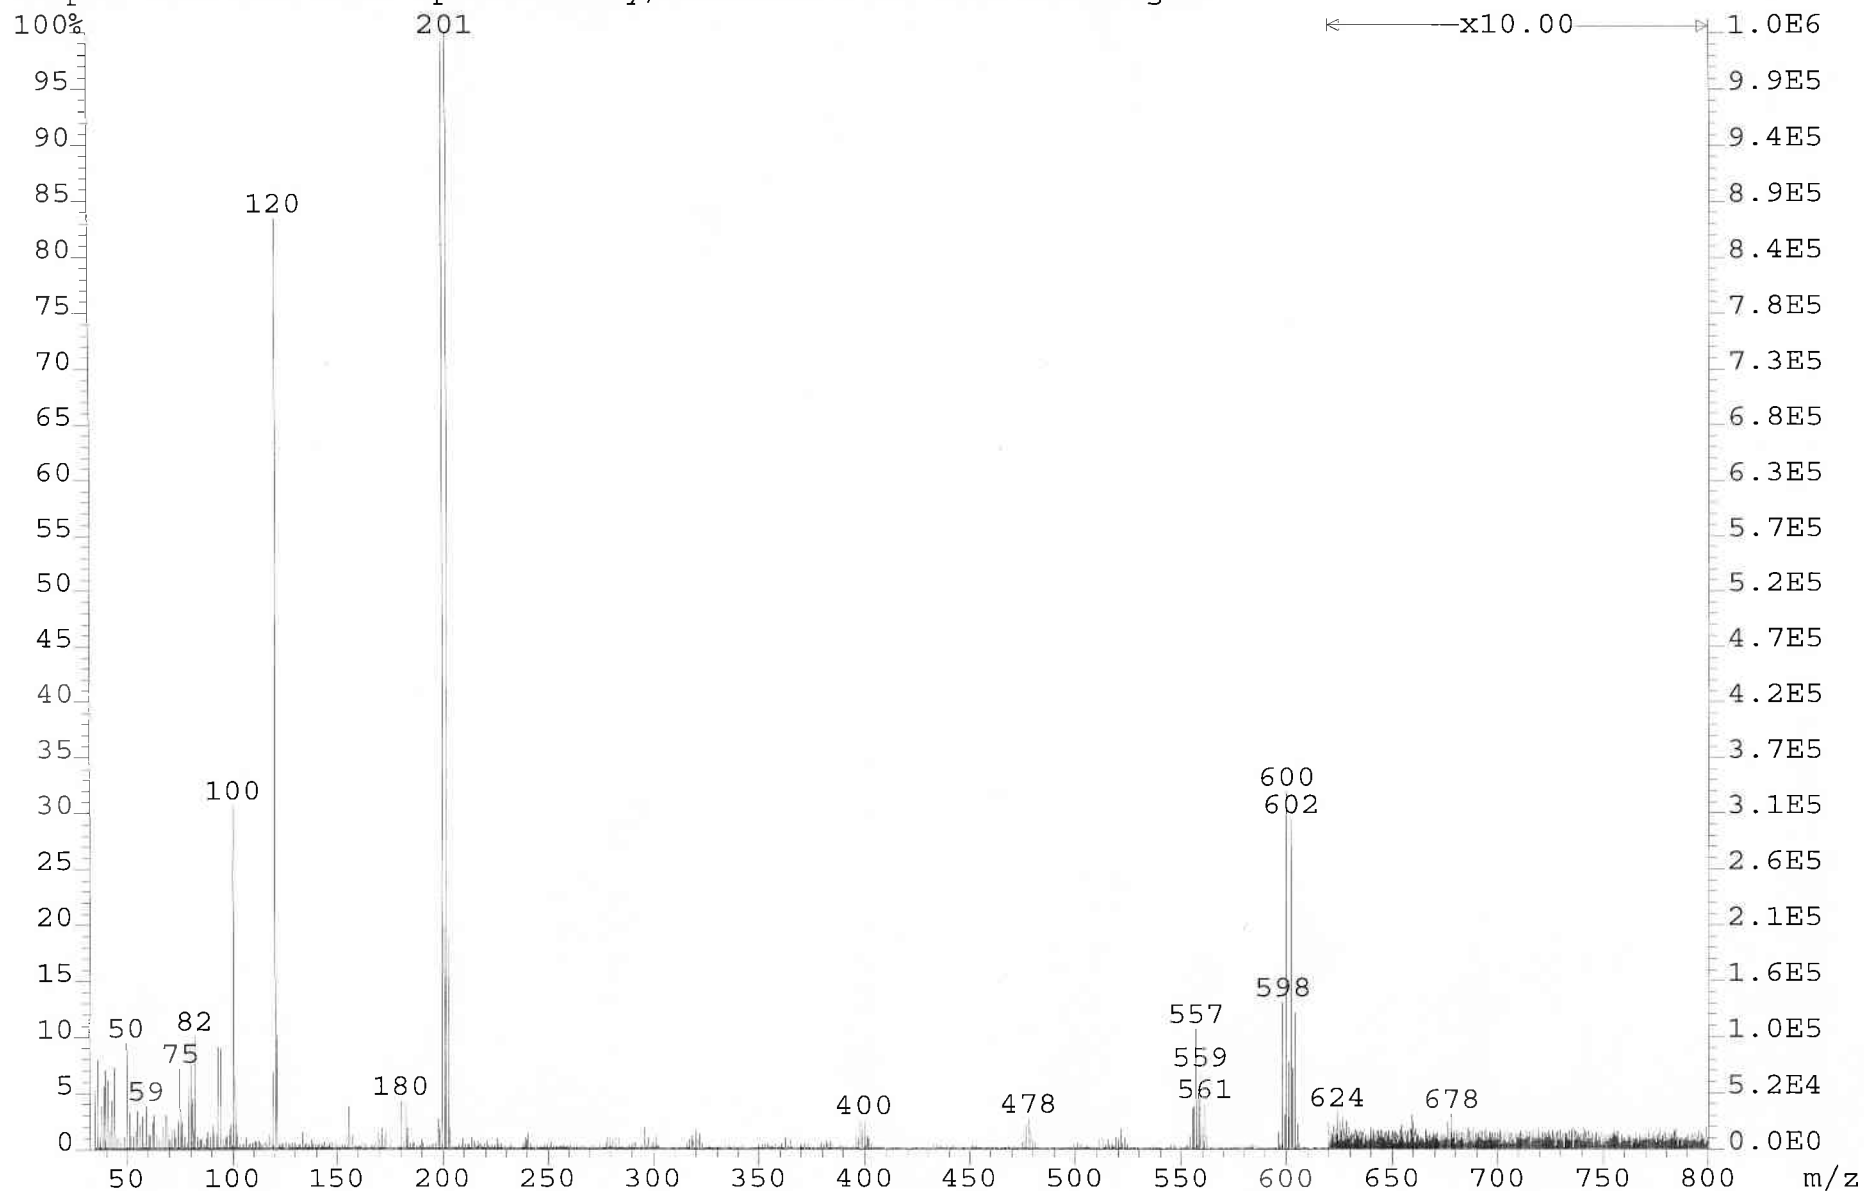

Supplement: c2ce06034e.zip [file 5-MS.pdf › 5-MS.pdf]
