# Supplementary material for: New symmetrically substituted 1,3,5-triazines as host compounds for channel-type inclusion formation
Source: Royal Society of Chemistry journal article supplement (doi:10.1039/c2ce06034e), 2011-12-08

File:BRTFPT Ident:51\_88-1\_7 Win 90PPM Acq:17-NOV-2009 11:09:17 +4:04 Cal:CEIMS\_1000\_1  
AutoSpecQ EI+ Magnet BpM:255 BpI:8975018 TIC:103022456 Flags:HALL  
Sample Text:DCB Mass Spectrometry/Schuerch File Text:R.Berger BrTFPT

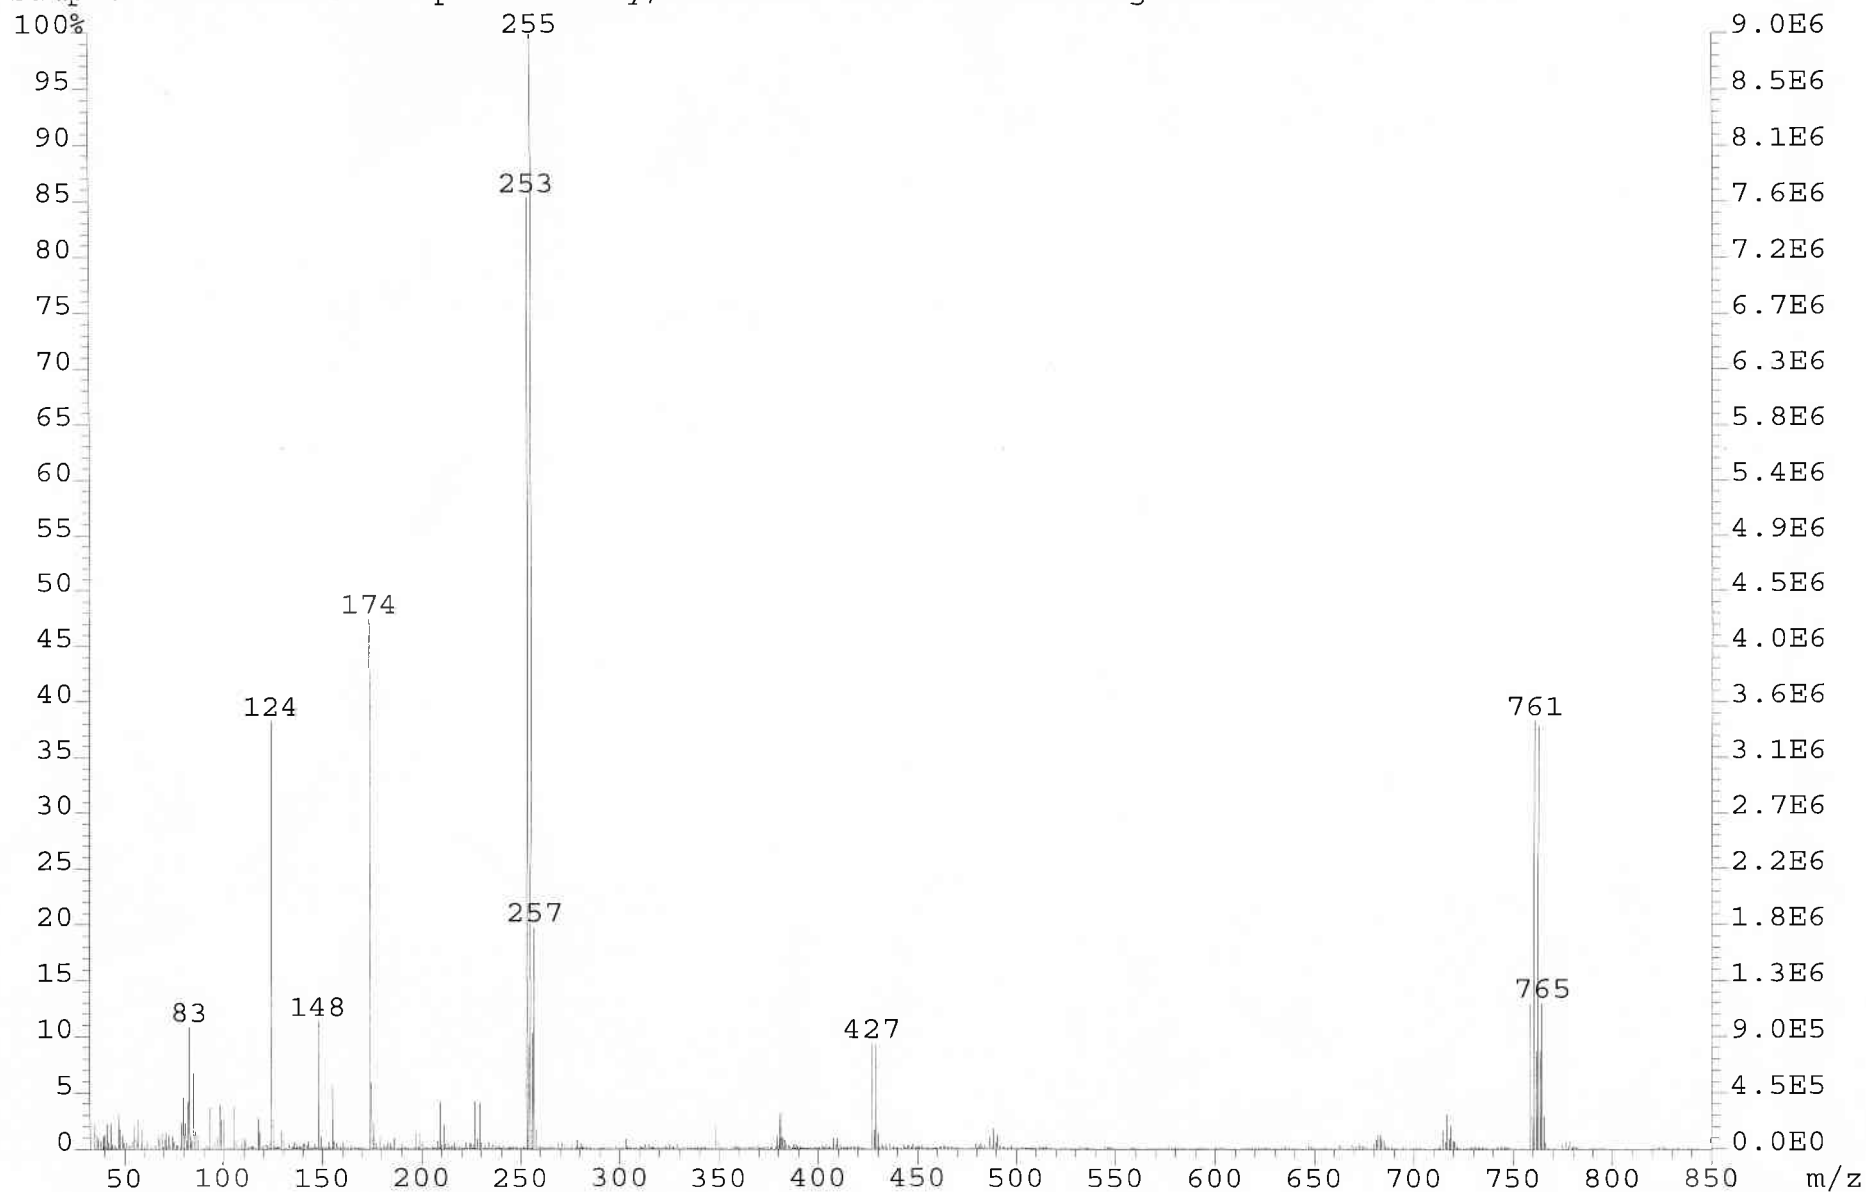

Supplement: c2ce06034e.zip [file 7-MS.pdf › 7-MS.pdf]
