# Supplementary material for: New symmetrically substituted 1,3,5-triazines as host compounds for channel-type inclusion formation
Source: Royal Society of Chemistry journal article supplement (doi:10.1039/c2ce06034e), 2011-12-08

File:PFBPT\_1 Ident:41\_88-2\_10 Win 90PPM Acq:12-NOV-2009 10:13:44 +3:46 Cal:CEIMS\_1000\_1  
AutoSpecQ EI+ Magnet BpM:270 BpI:2806893 TIC:57006580 Flags:HALL  
Sample Text:DCB Mass Spectrometry/Schuerch File Text:R. Berger

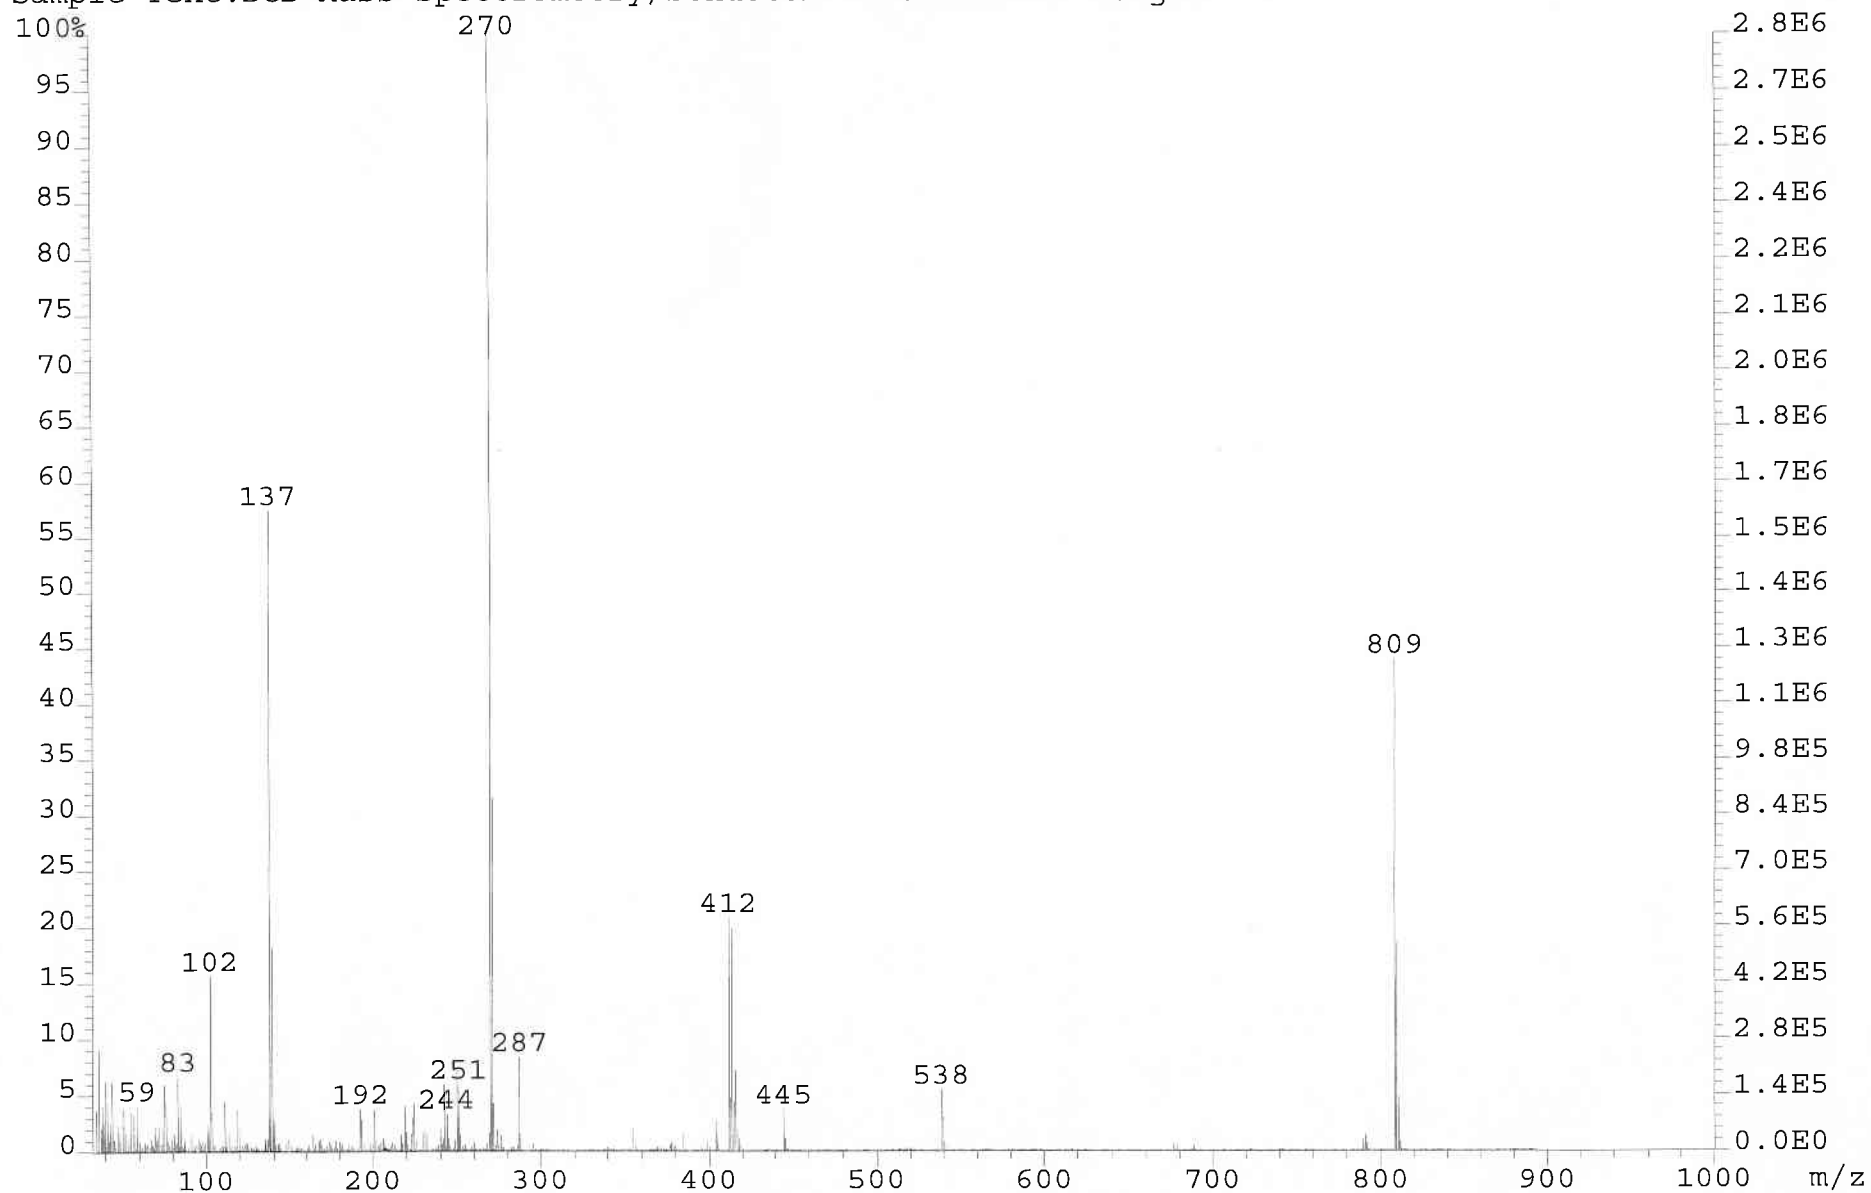

Supplement: c2ce06034e.zip [file 10-MS.pdf › 10-MS.pdf]
