# Supplementary figures and images for: New symmetrically substituted 1,3,5-triazines as host compounds for channel-type inclusion formation
Source: Royal Society of Chemistry journal article supplement (doi:10.1039/c2ce06034e), 2011-12-08

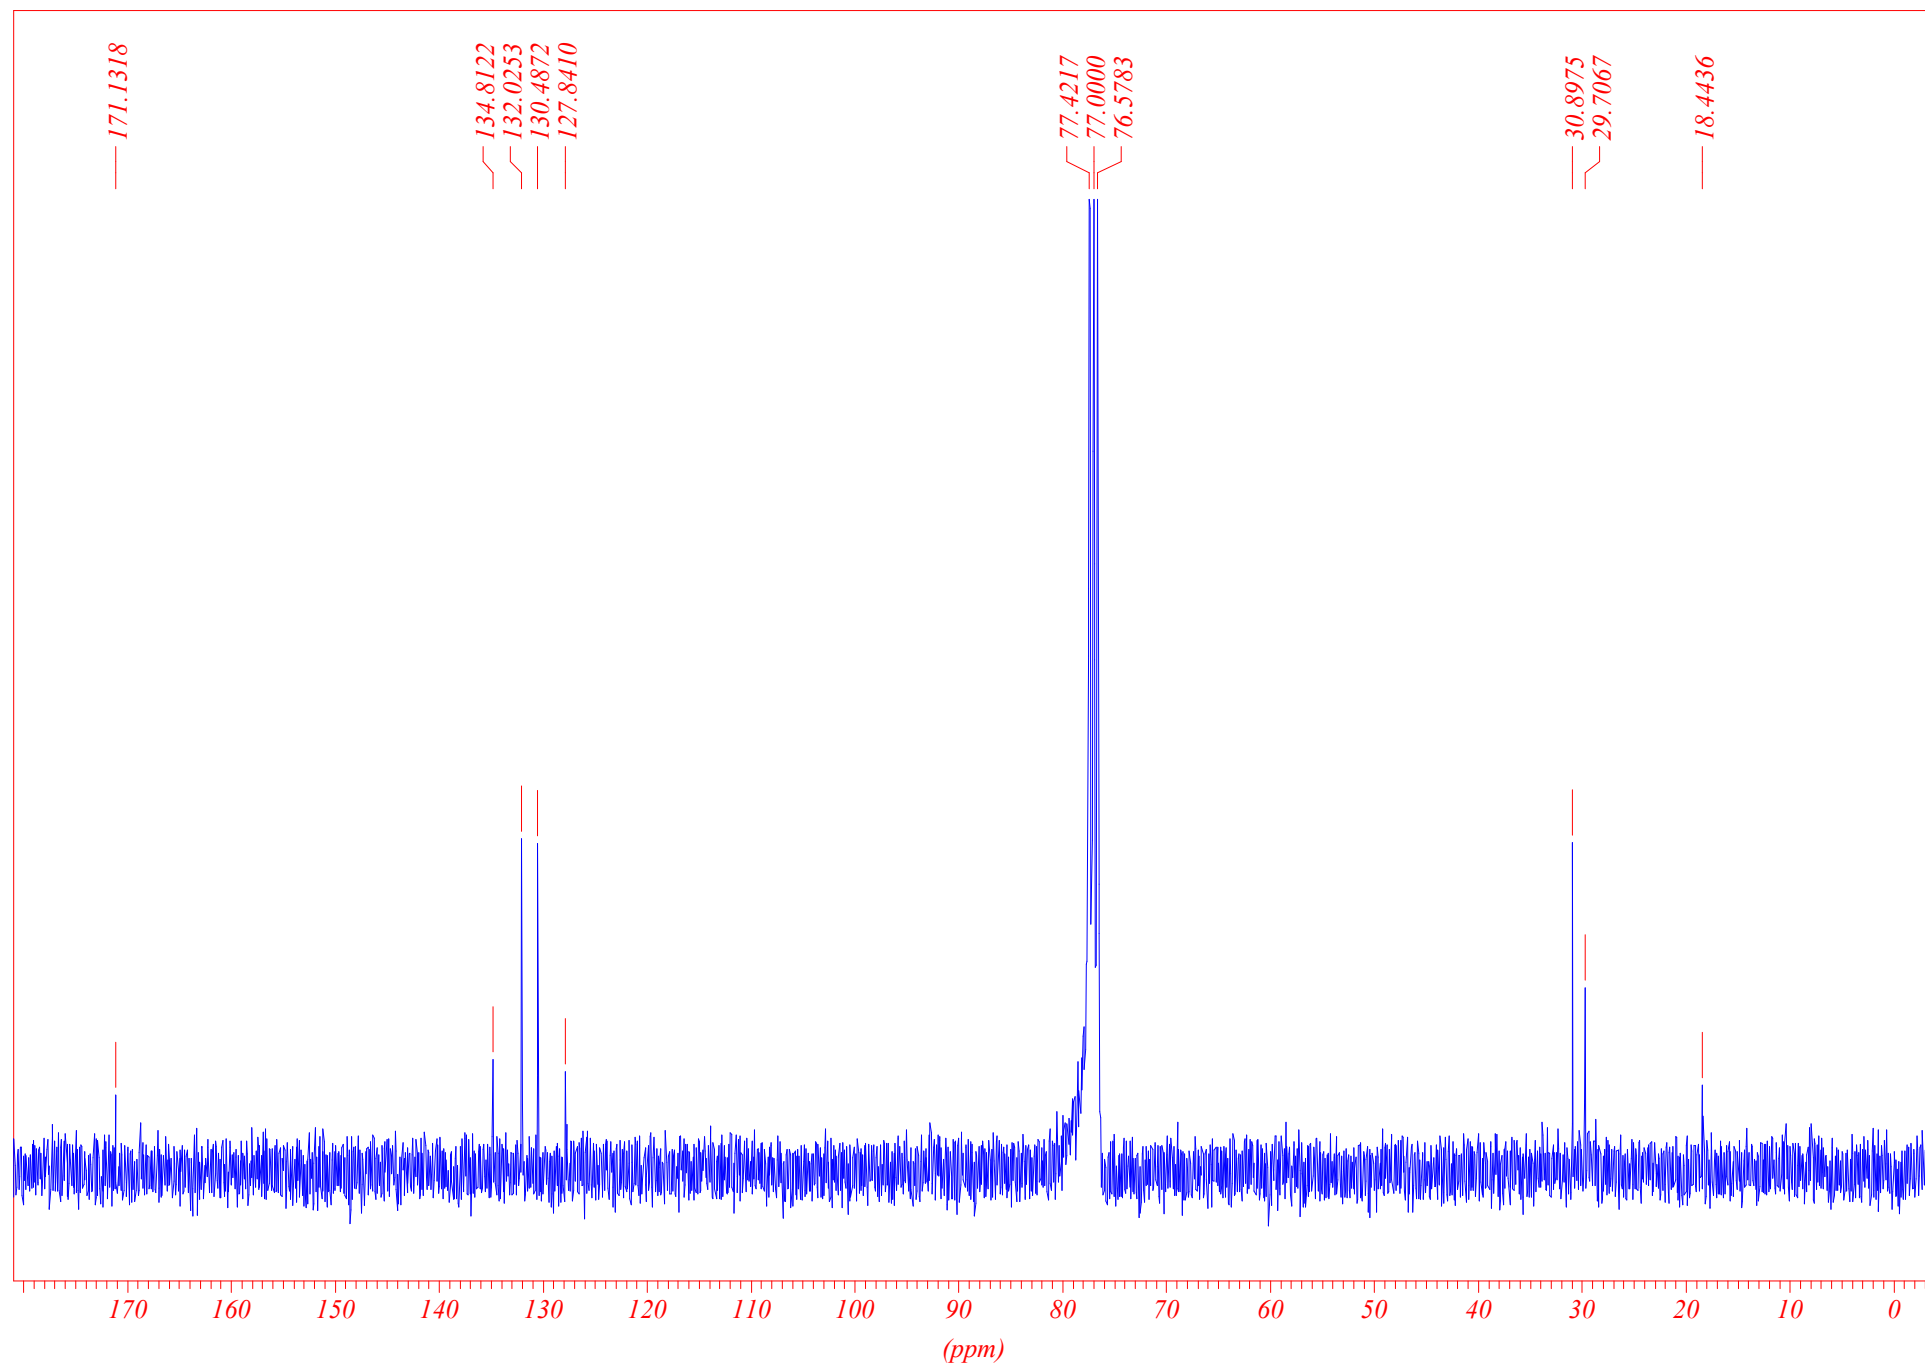

Supplement: c2ce06034e.zip [file 3-C-NMR.pdf › 3-C-NMR.pdf]

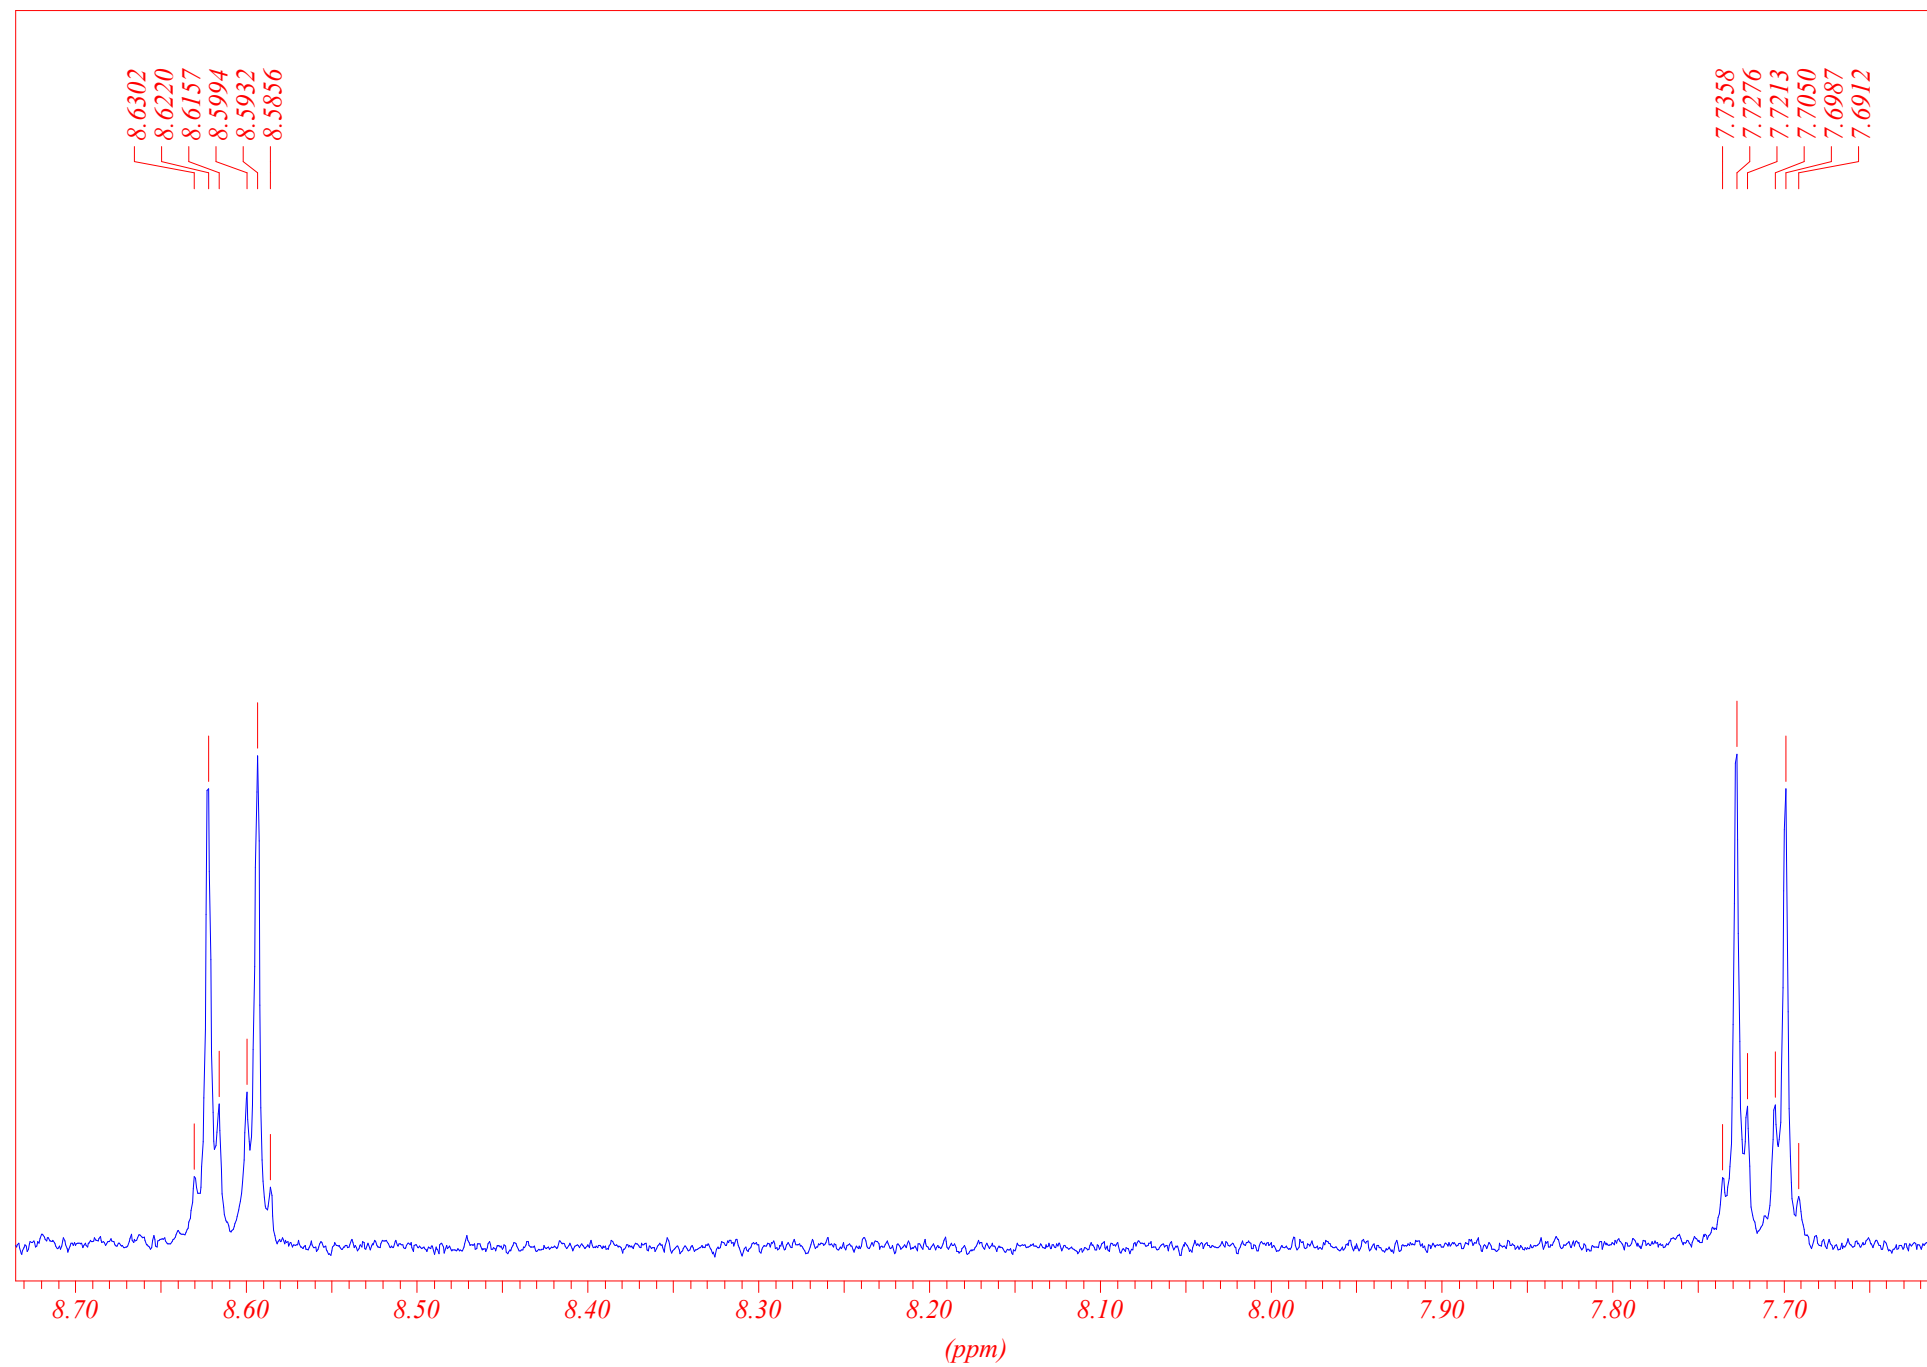

Supplement: c2ce06034e.zip [file 3-H-NMR-Zoom.pdf › 3-H-NMR-Zoom.pdf]

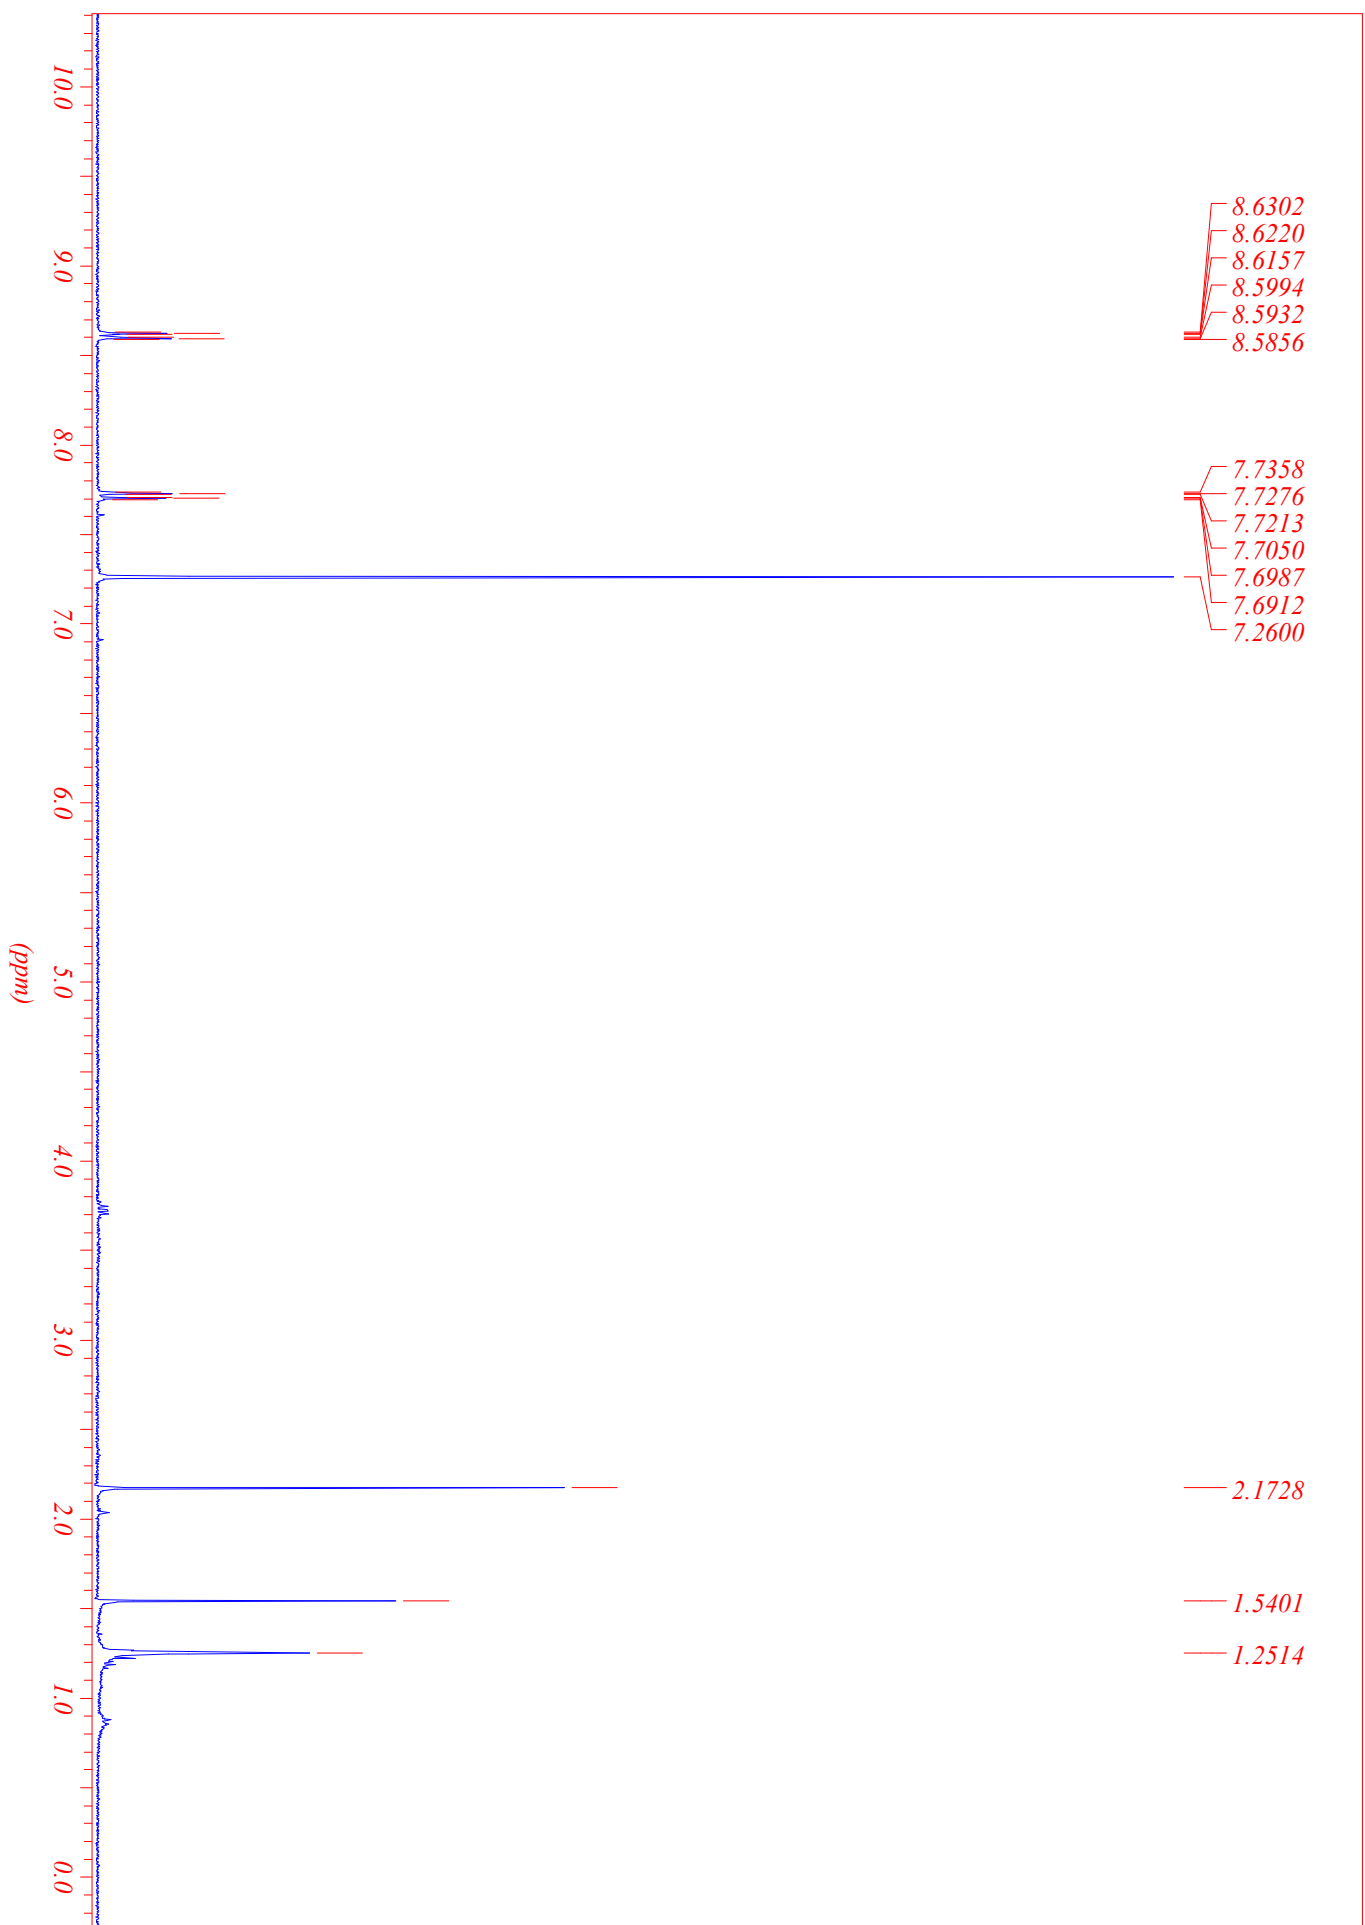

Supplement: c2ce06034e.zip [file 3-H-NMR.pdf › 3-H-NMR.pdf]

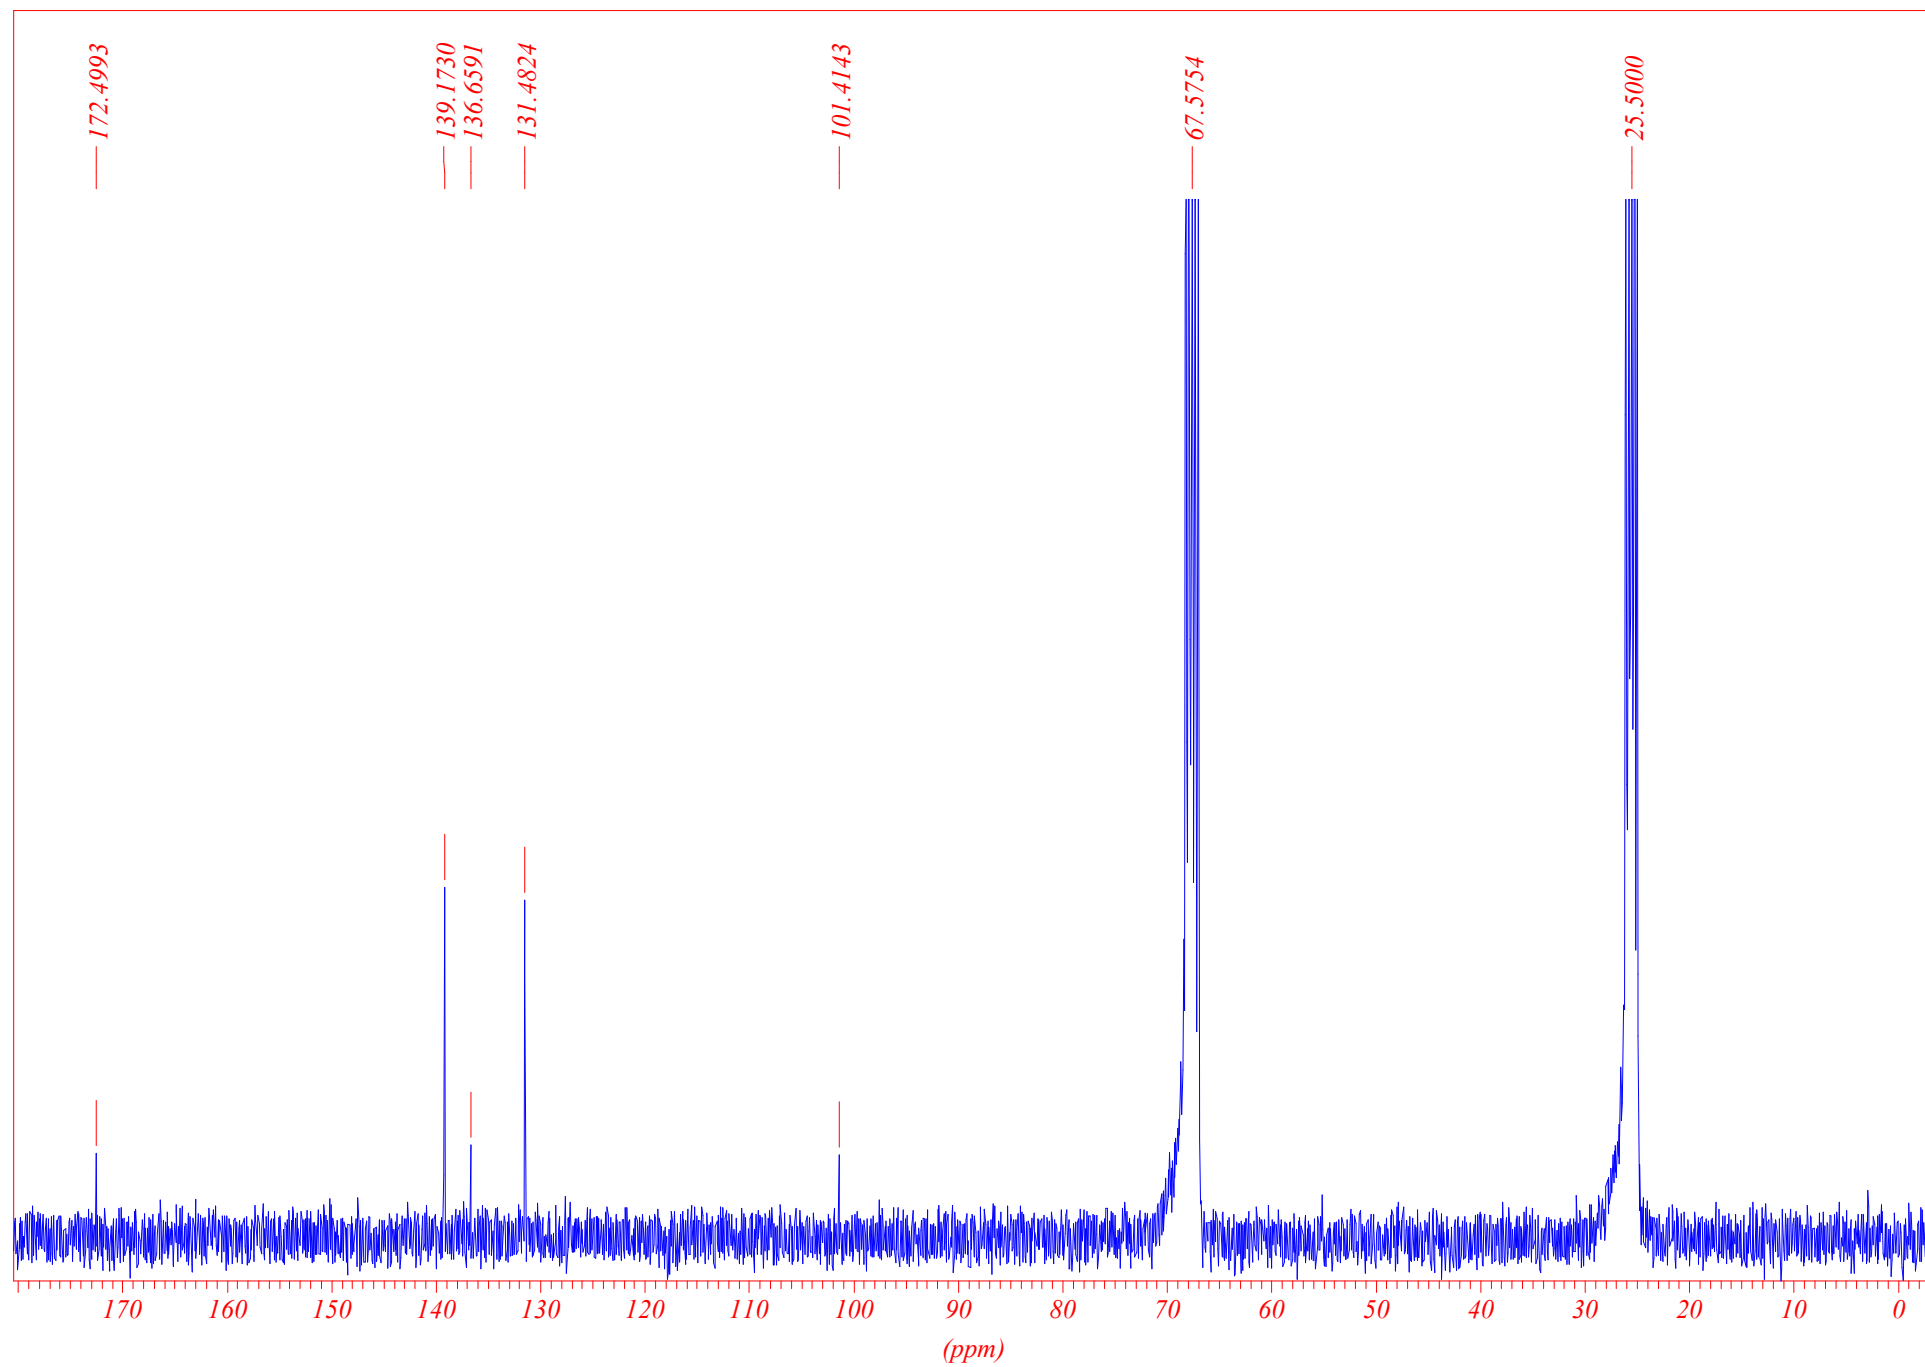

Supplement: c2ce06034e.zip [file 4-C-NMR.pdf › 4-C-NMR.pdf]

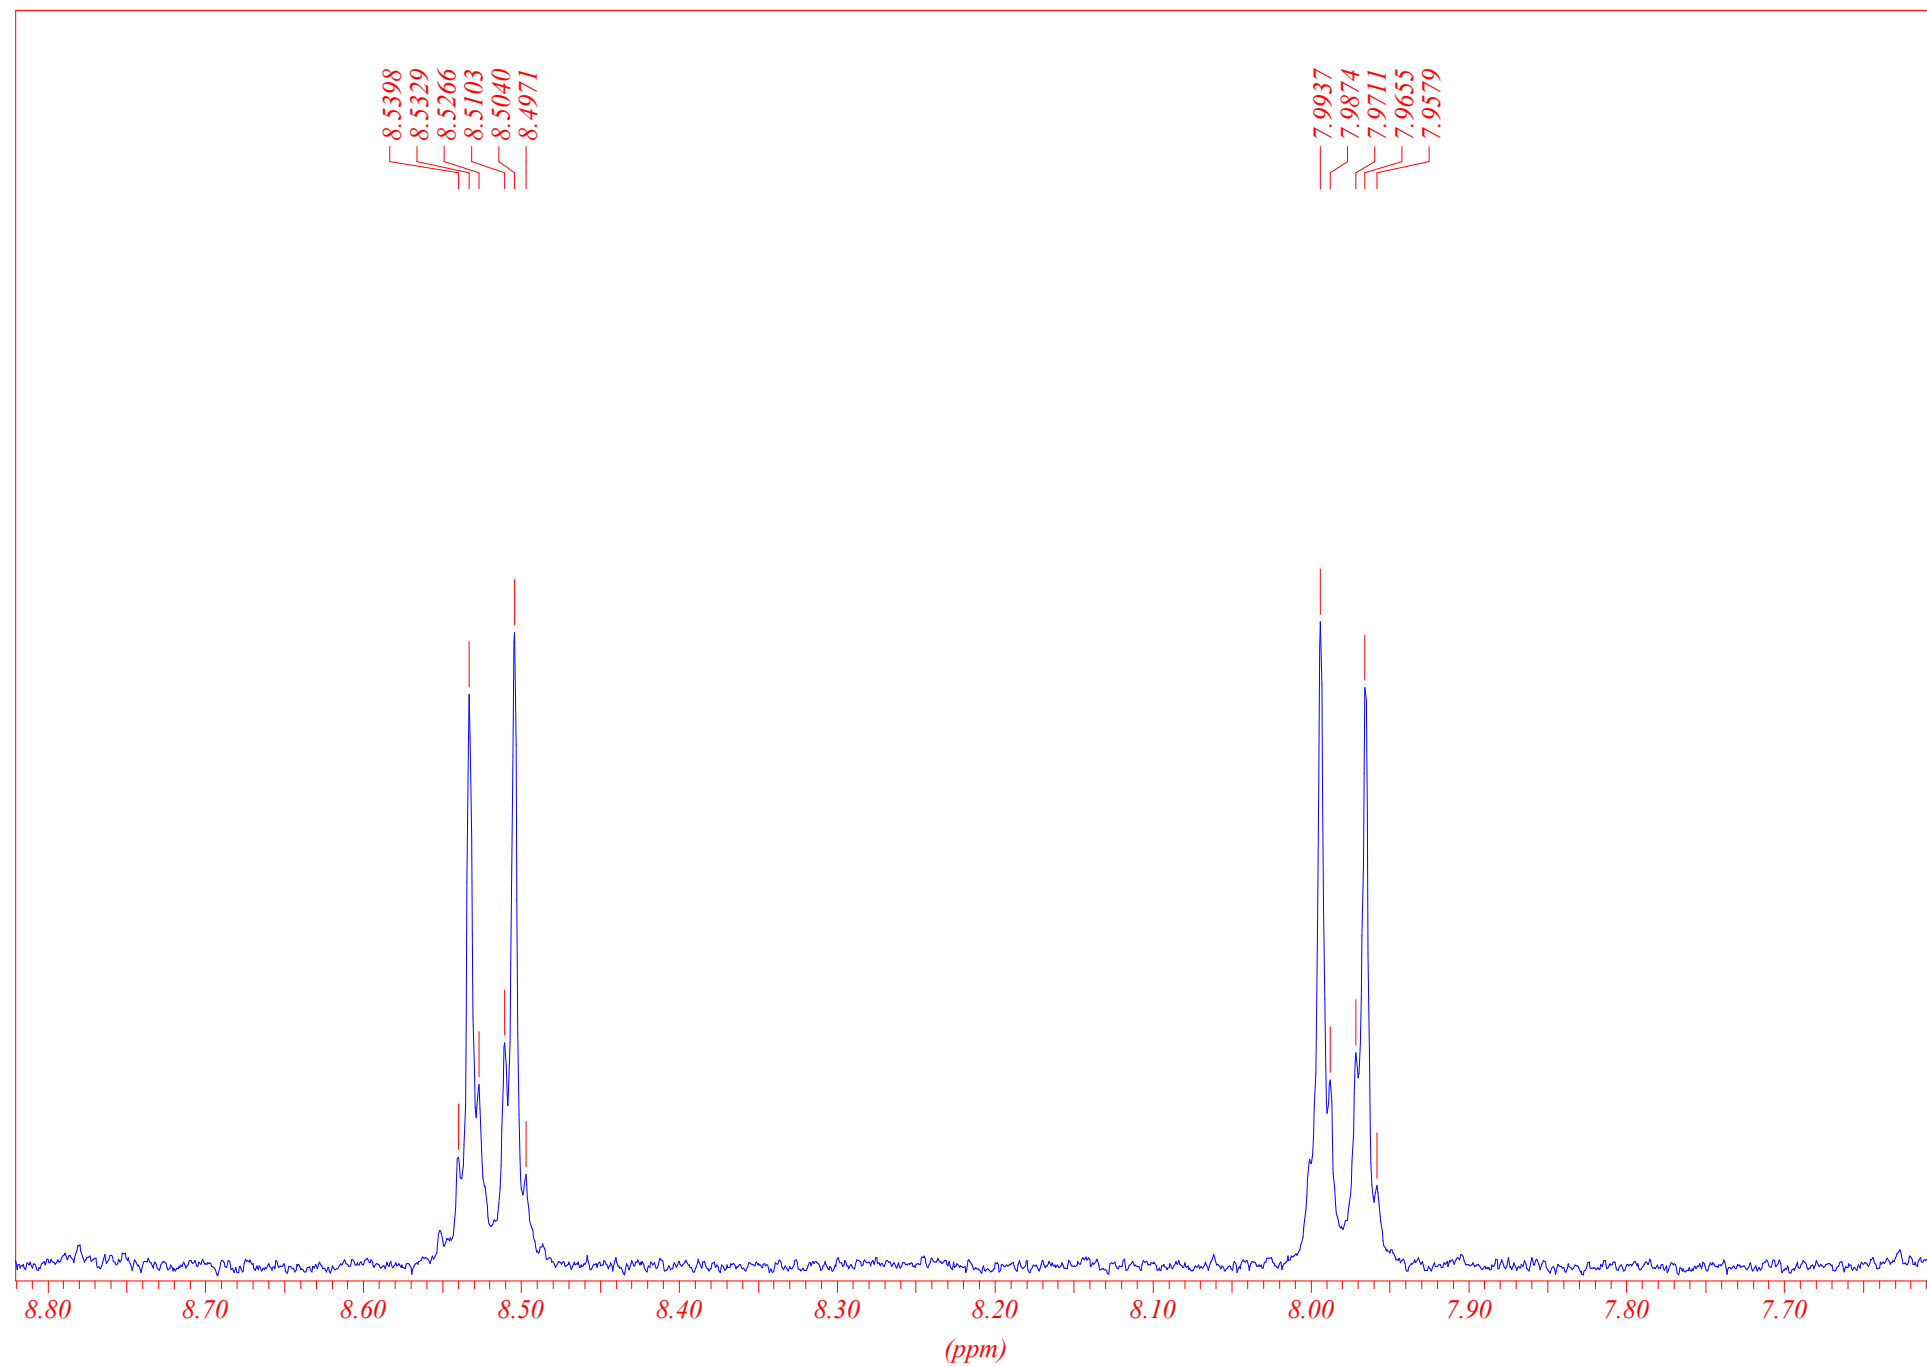

Supplement: c2ce06034e.zip [file 4-H-NMR-Zoom.pdf › 4-H-NMR-Zoom.pdf]

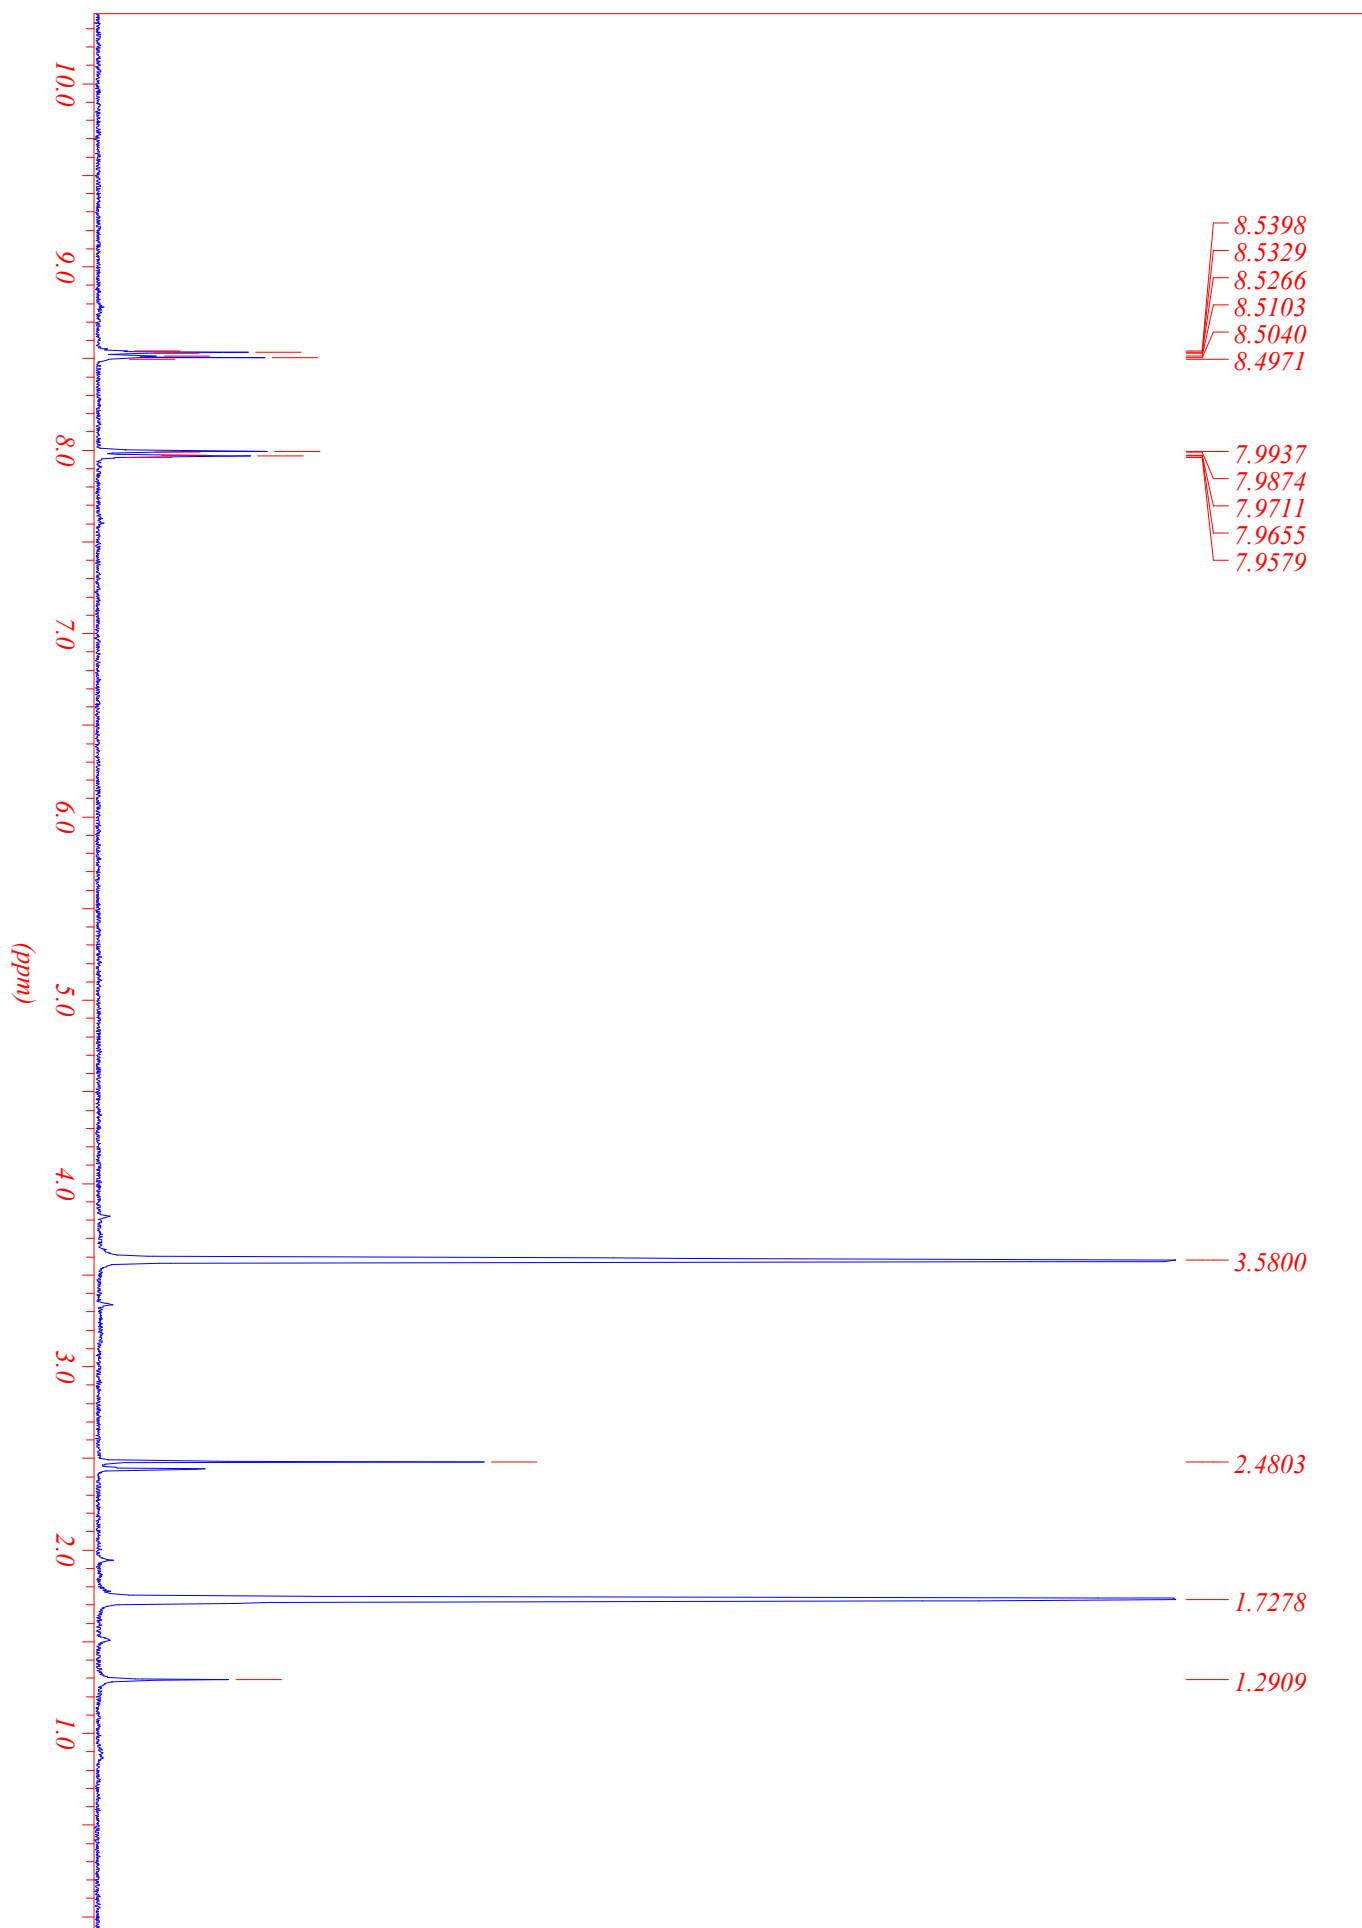

Supplement: c2ce06034e.zip [file 4-H-NMR.pdf › 4-H-NMR.pdf]

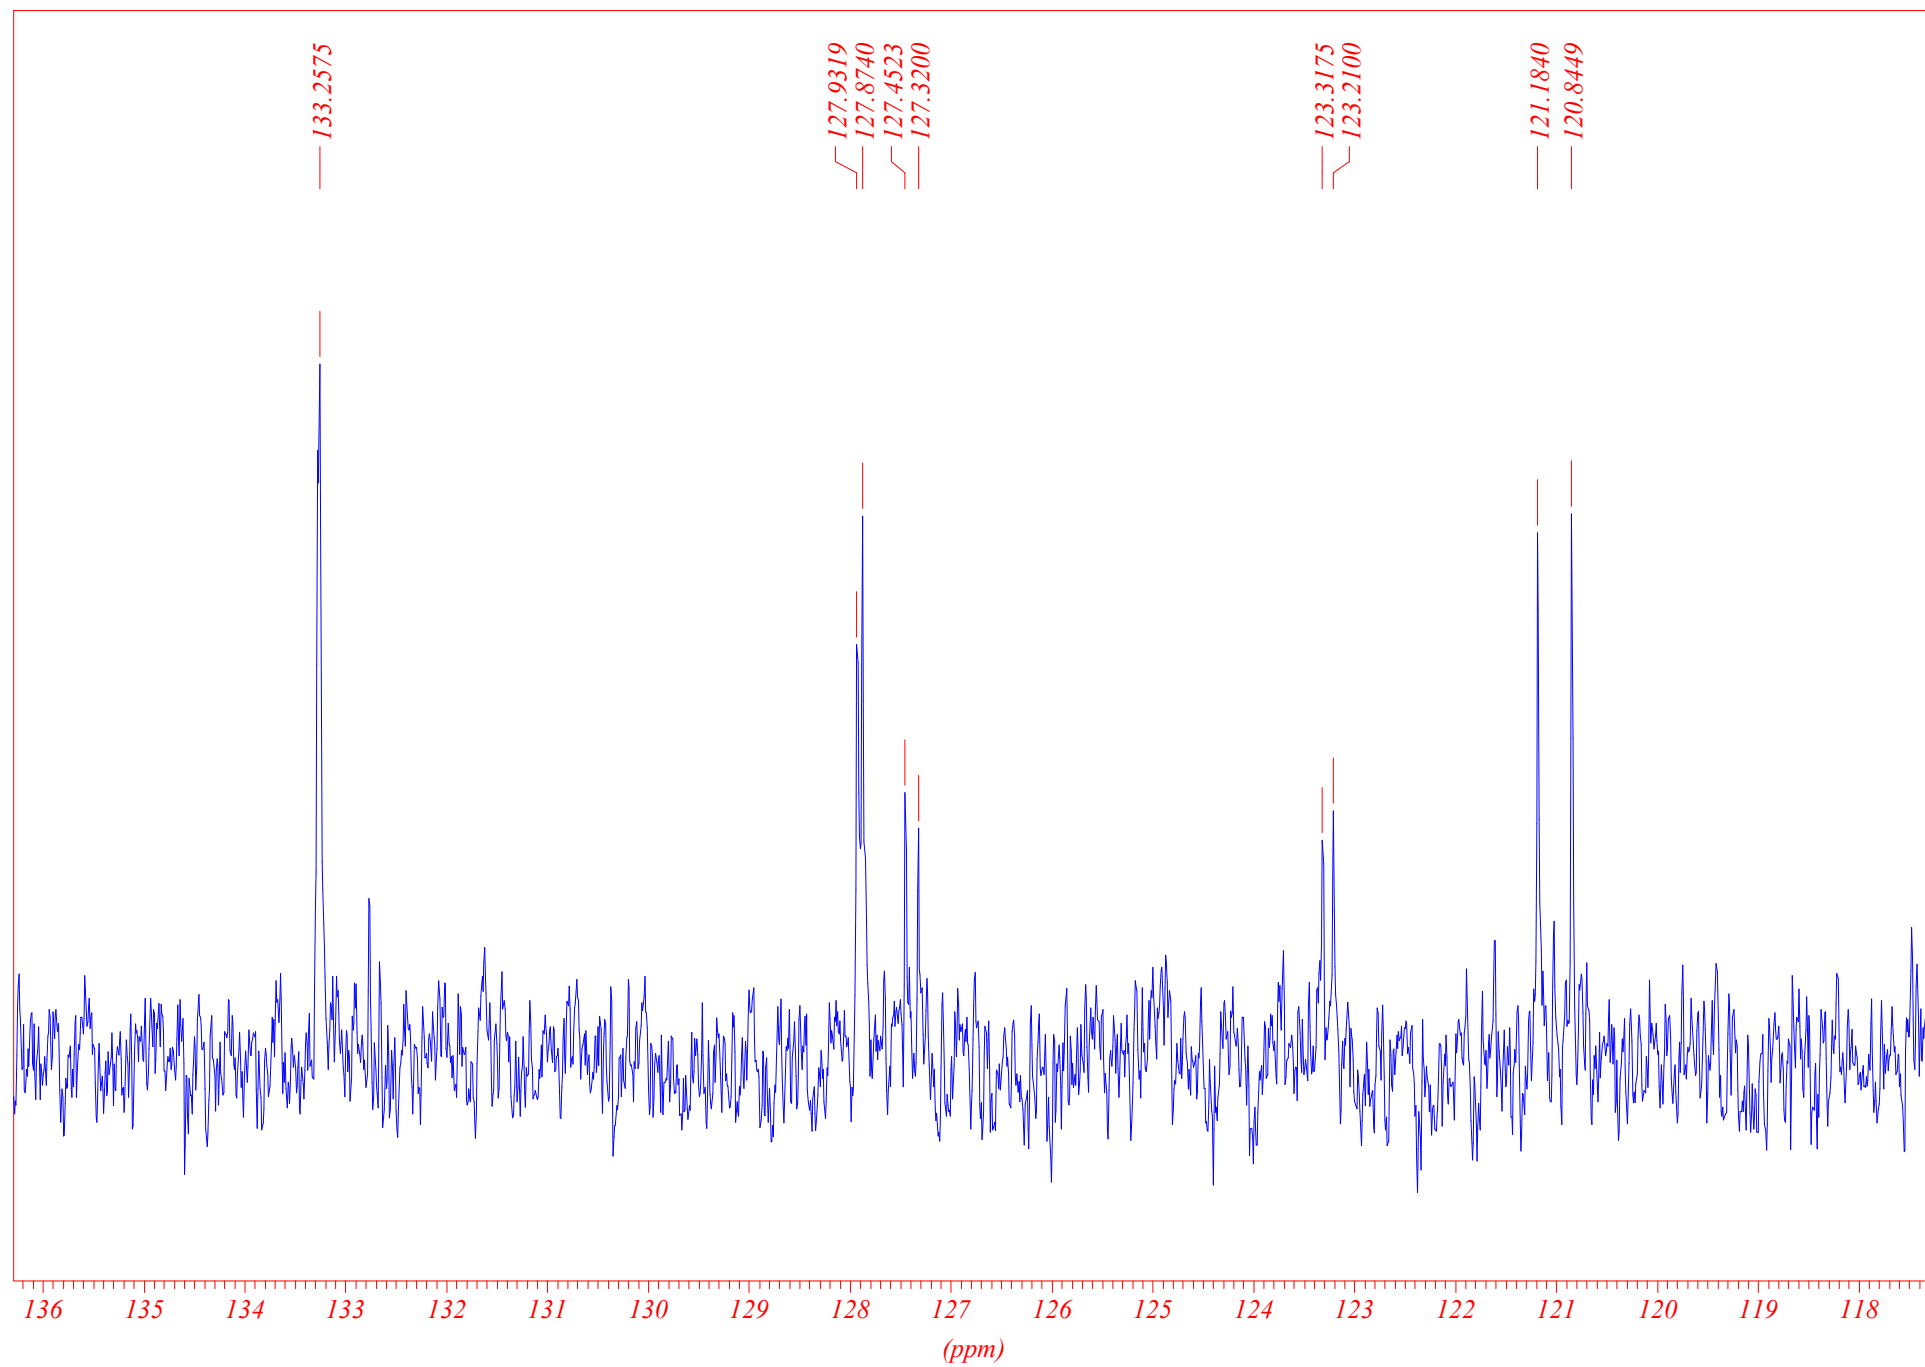

Supplement: c2ce06034e.zip [file 5-C-NMR-Zoom.pdf › 5-C-NMR-Zoom.pdf]

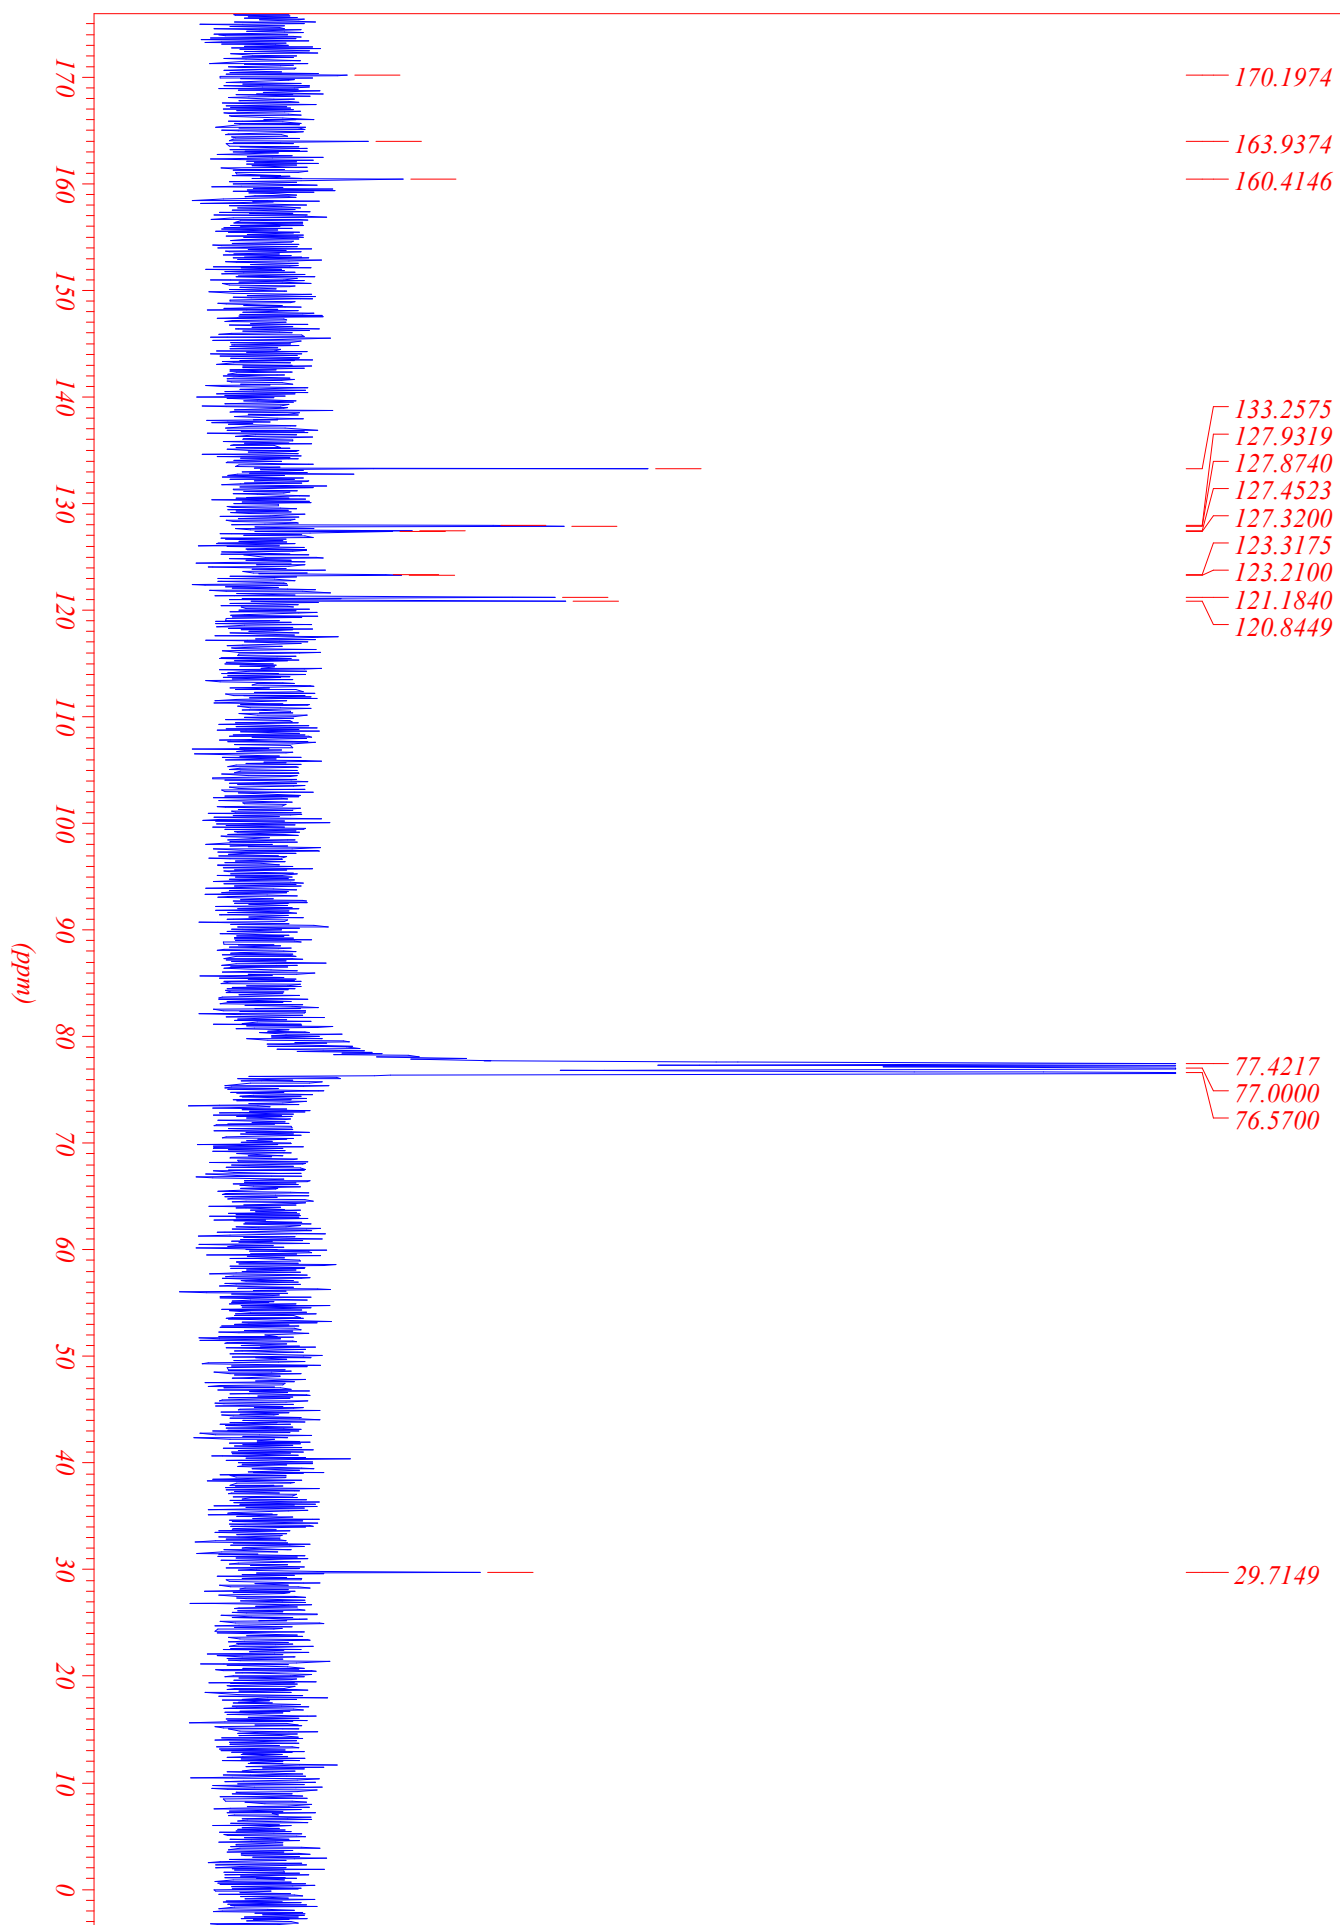

Supplement: c2ce06034e.zip [file 5-C-NMR.pdf › 5-C-NMR.pdf]

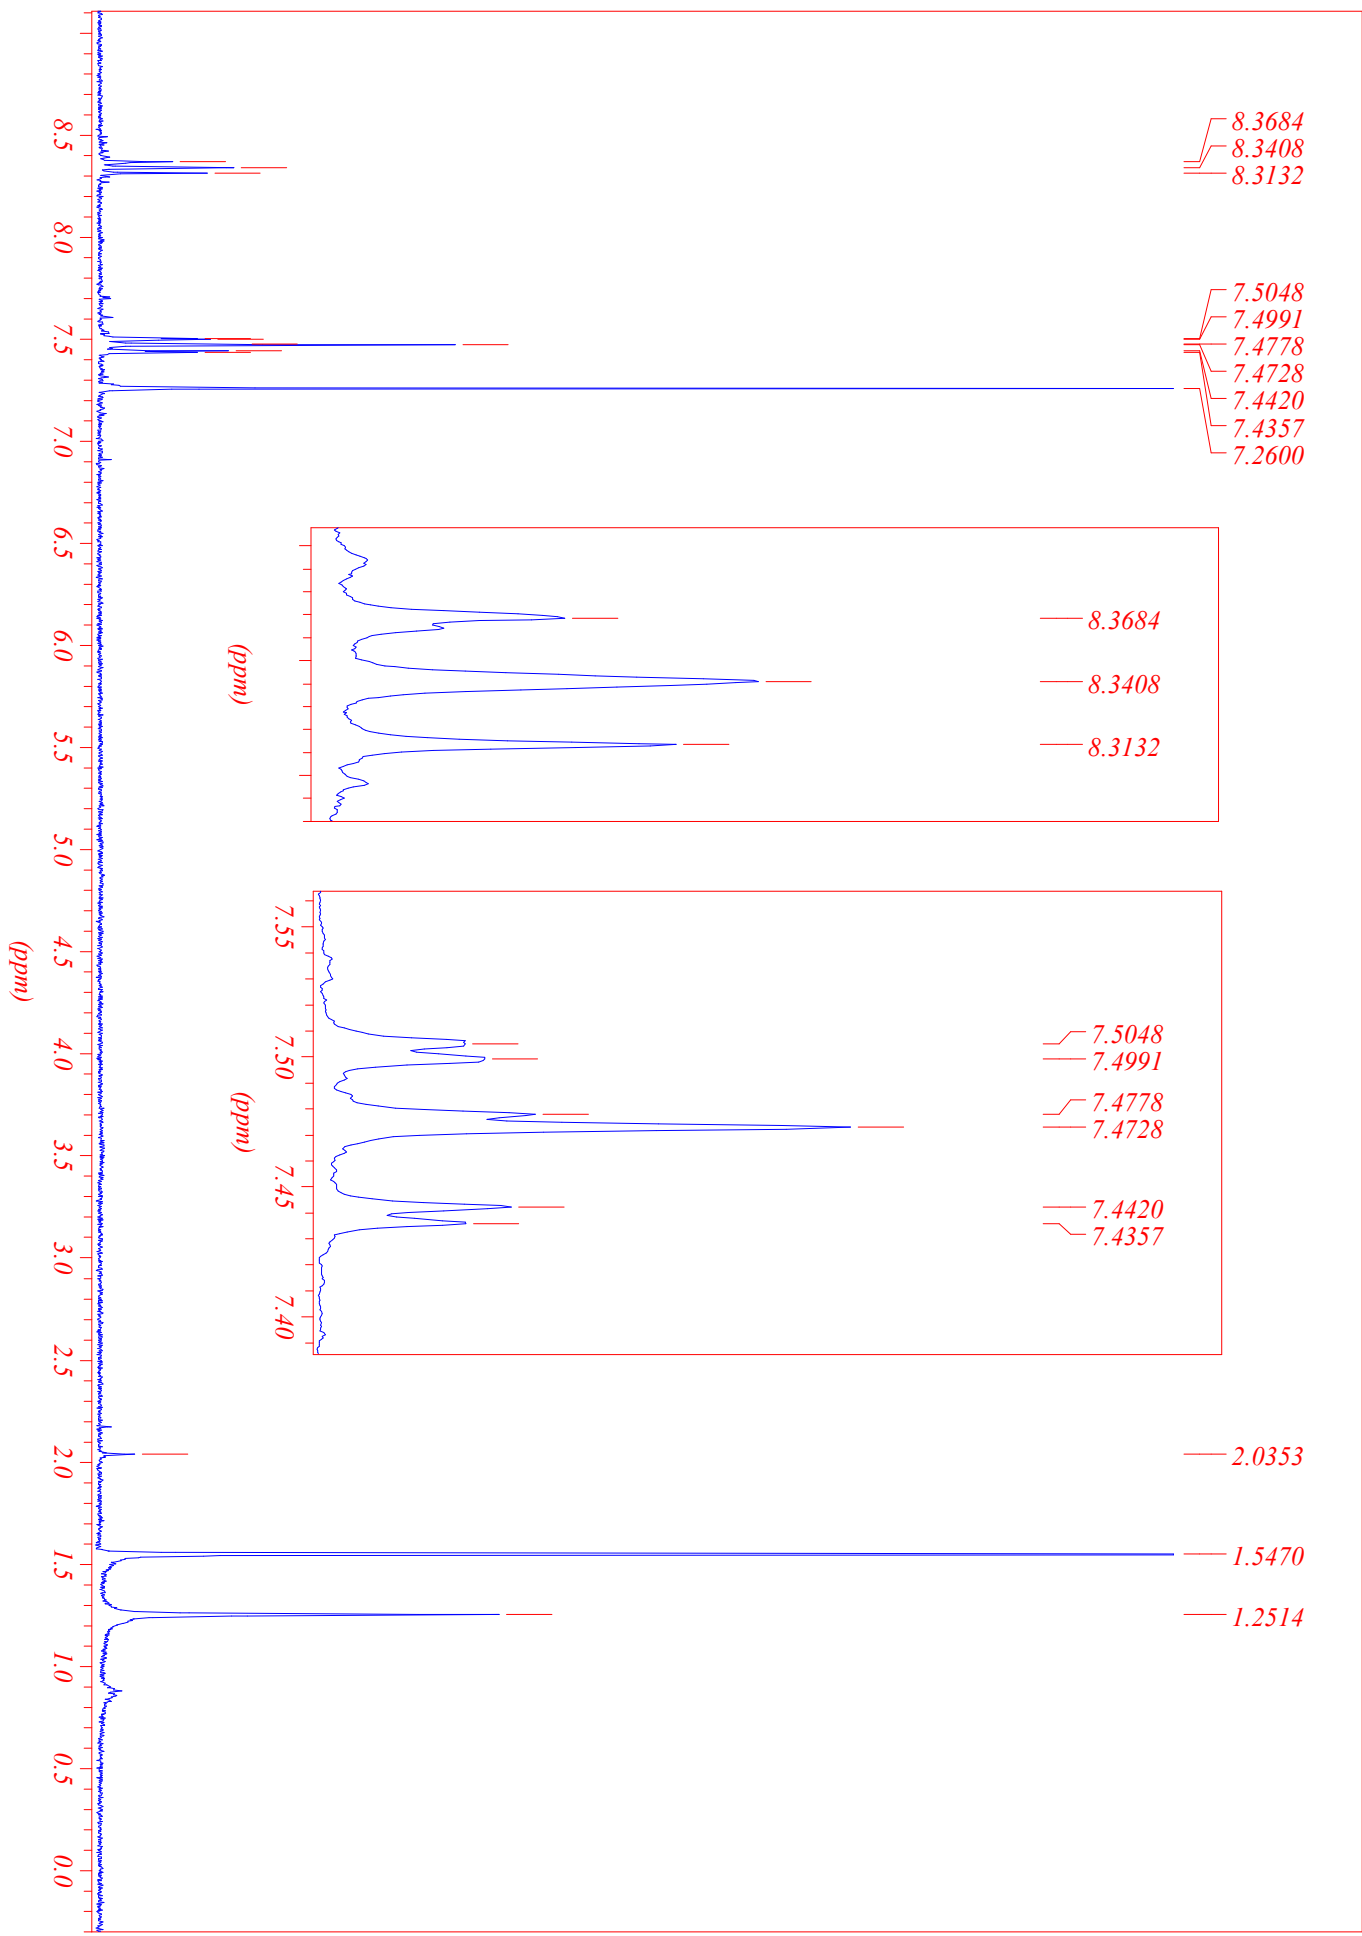

Supplement: c2ce06034e.zip [file 5-H-NMR.pdf › 5-H-NMR.pdf]

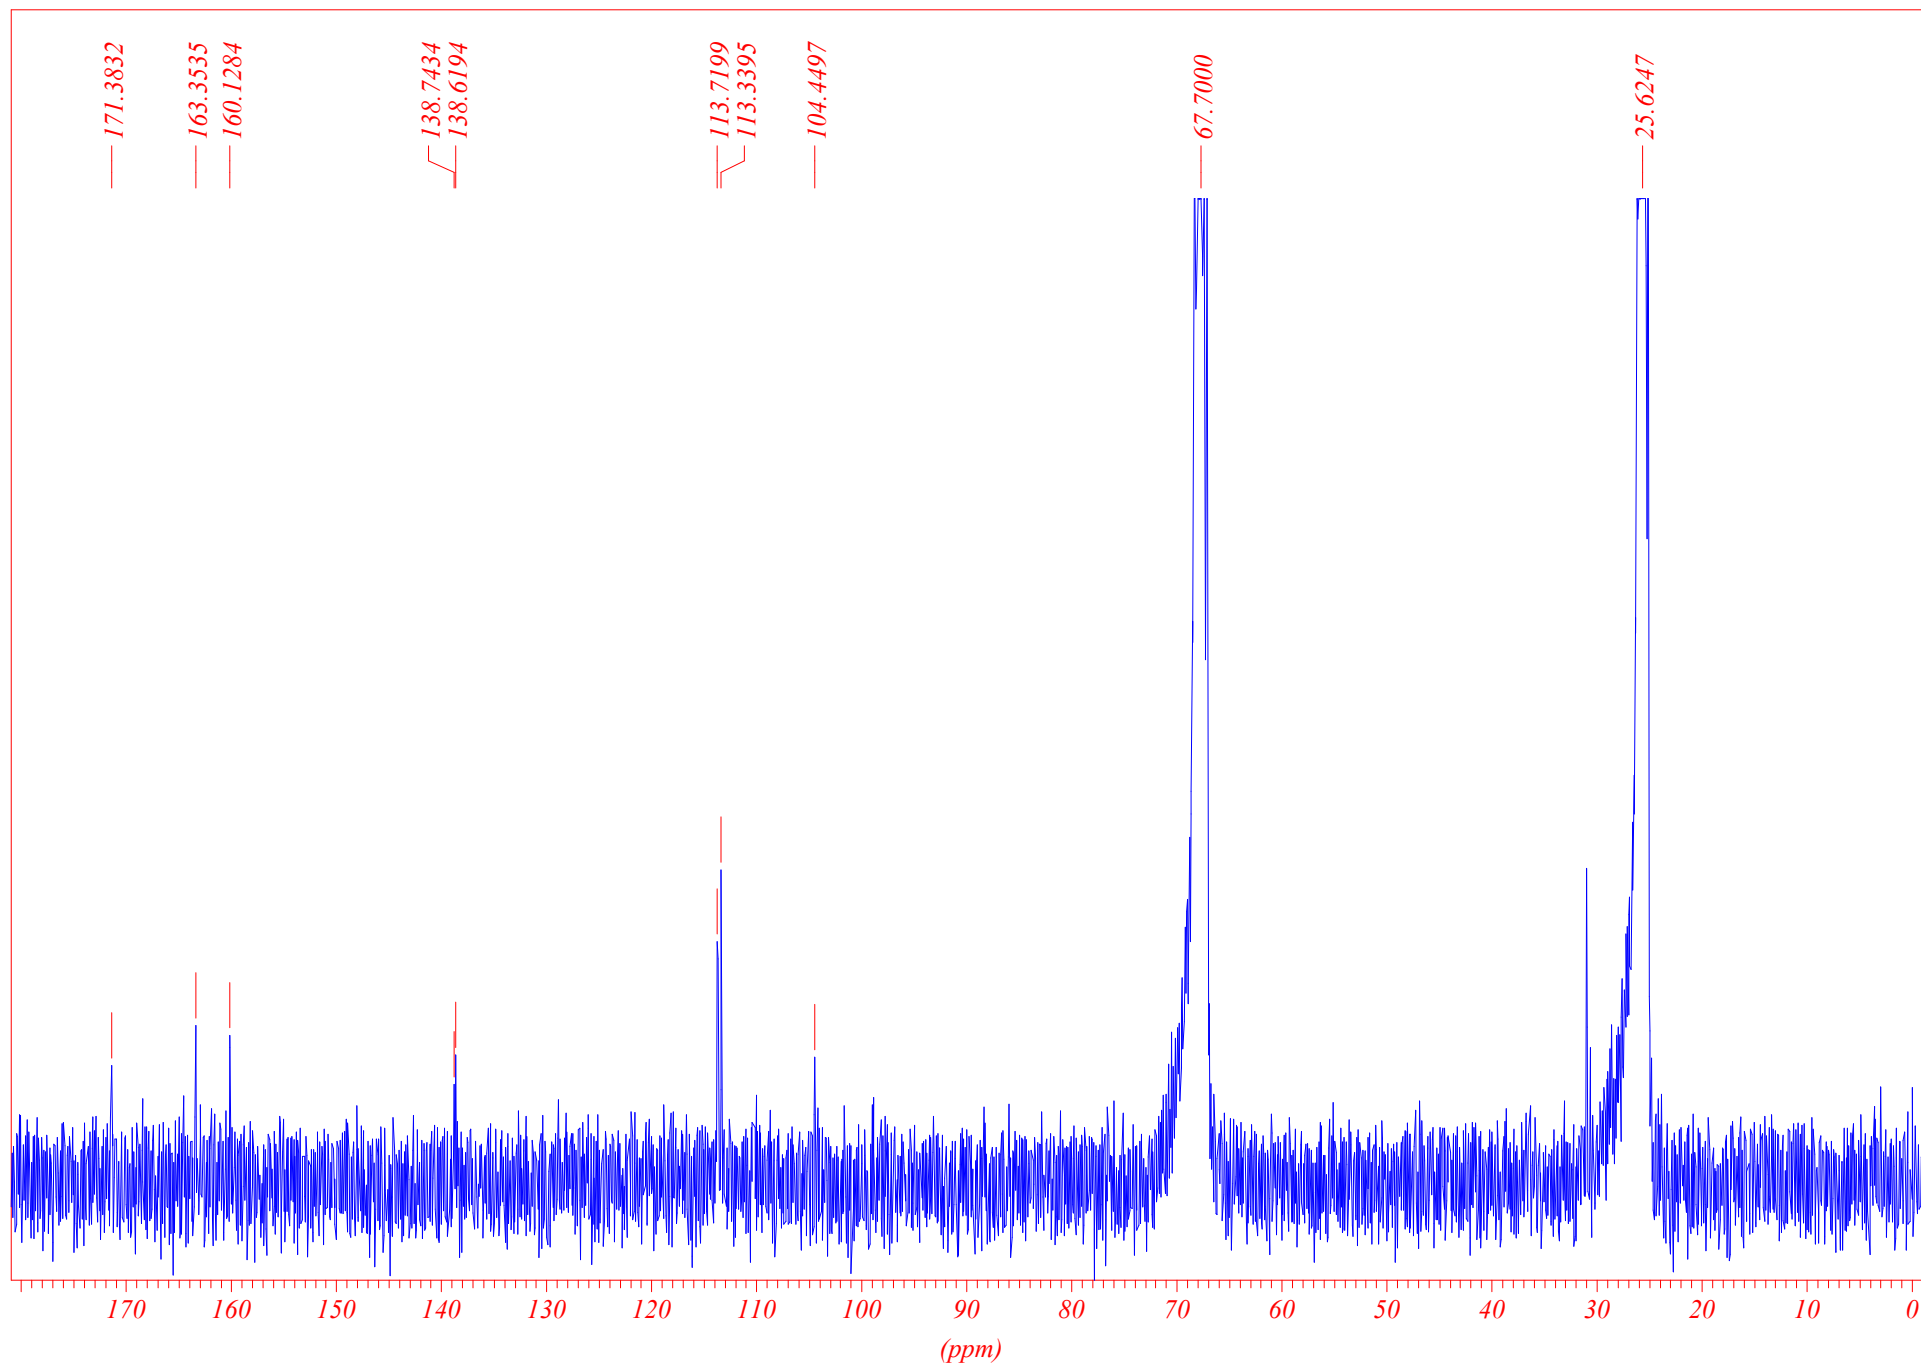

Supplement: c2ce06034e.zip [file 6-C-NMR.pdf › 6-C-NMR.pdf]

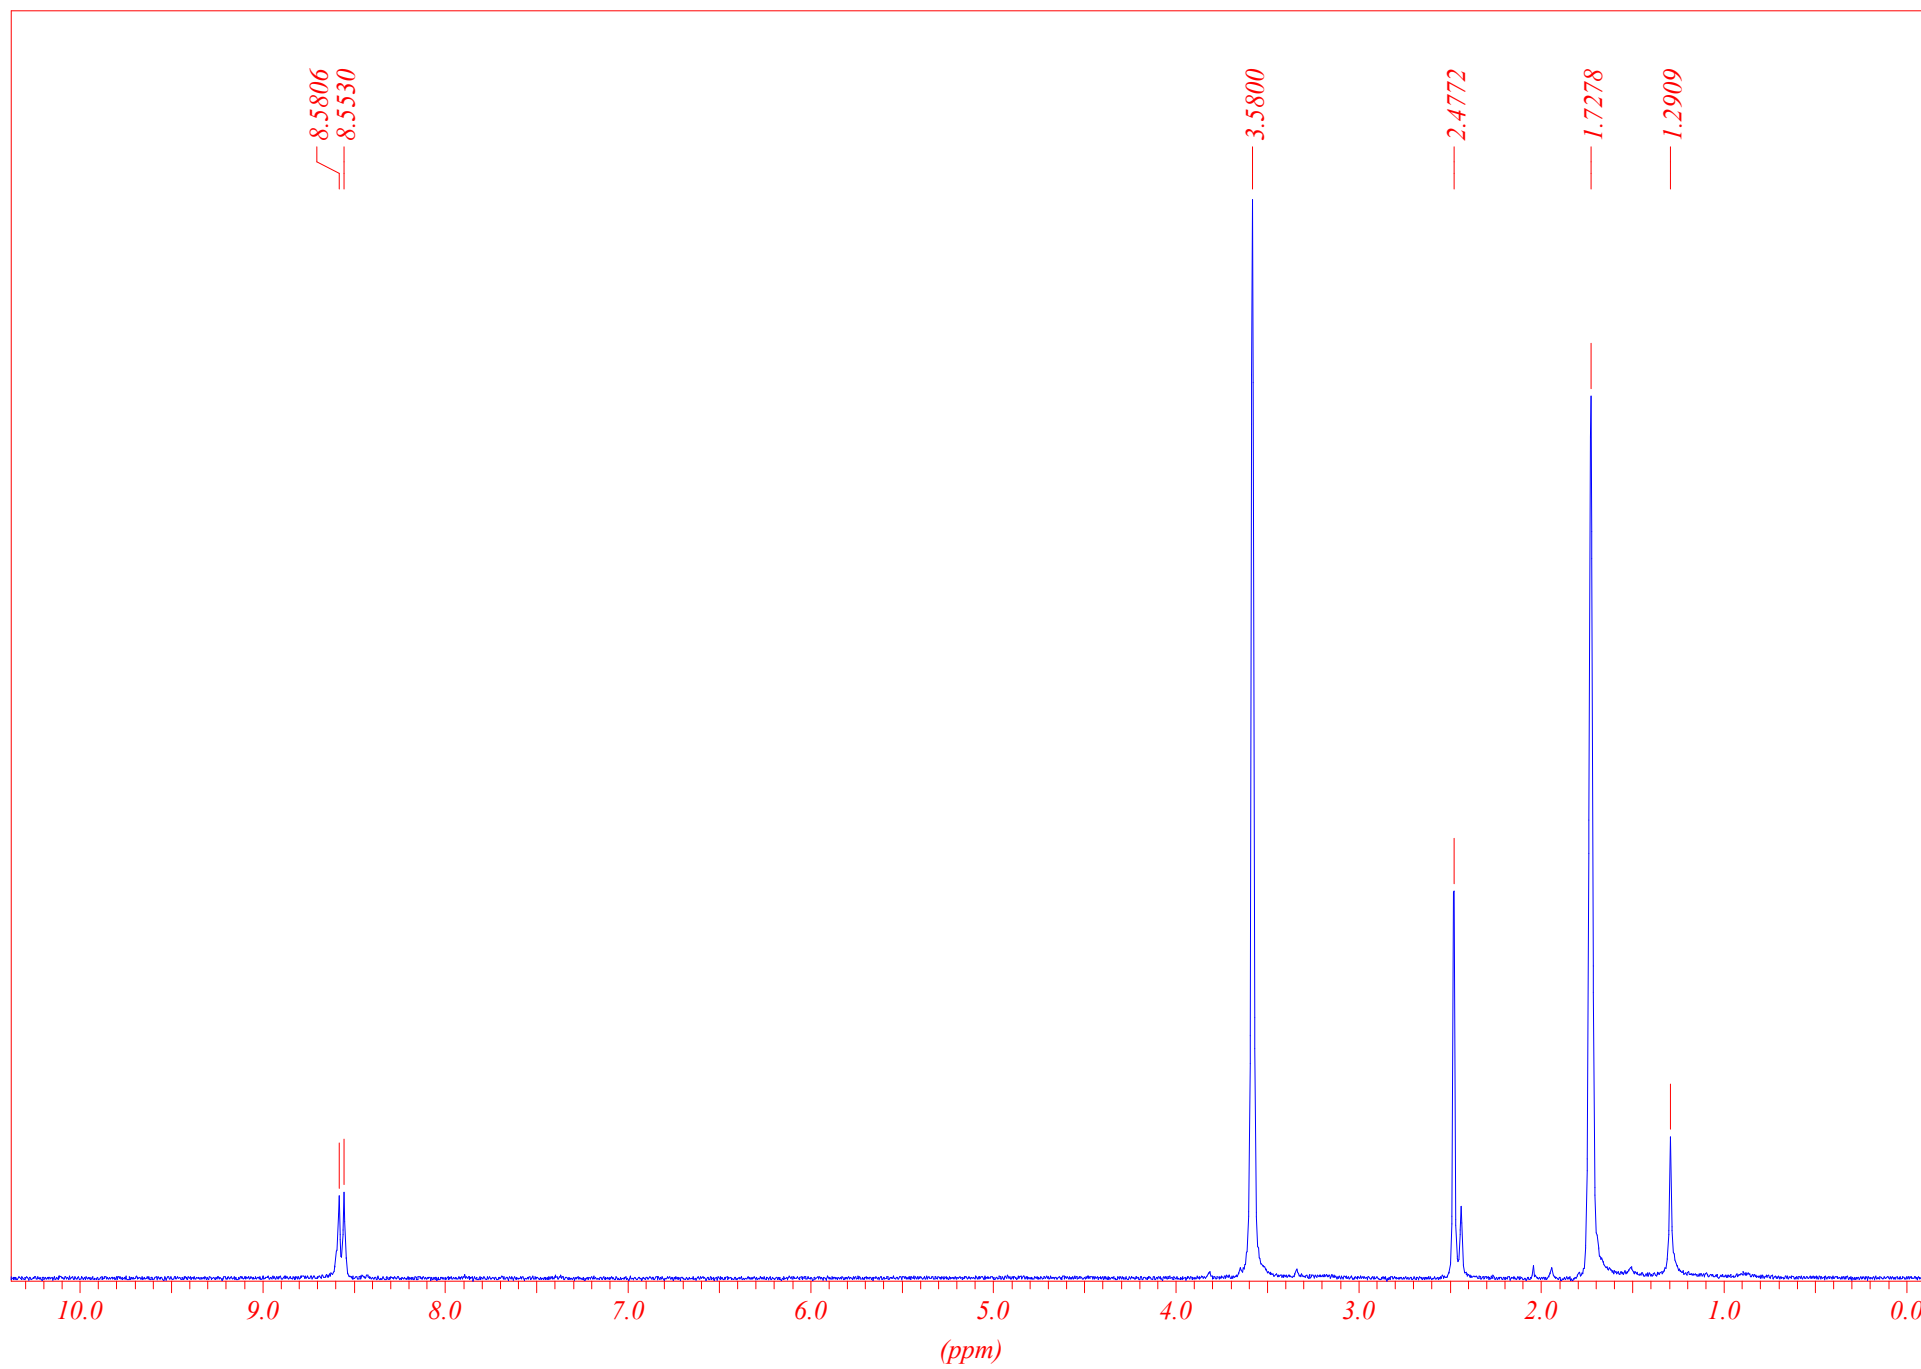

Supplement: c2ce06034e.zip [file 6-H-NMR.pdf › 6-H-NMR.pdf]

( Voyager Spec #1=>NR(2.00)[BP = 654.2, 5527] (

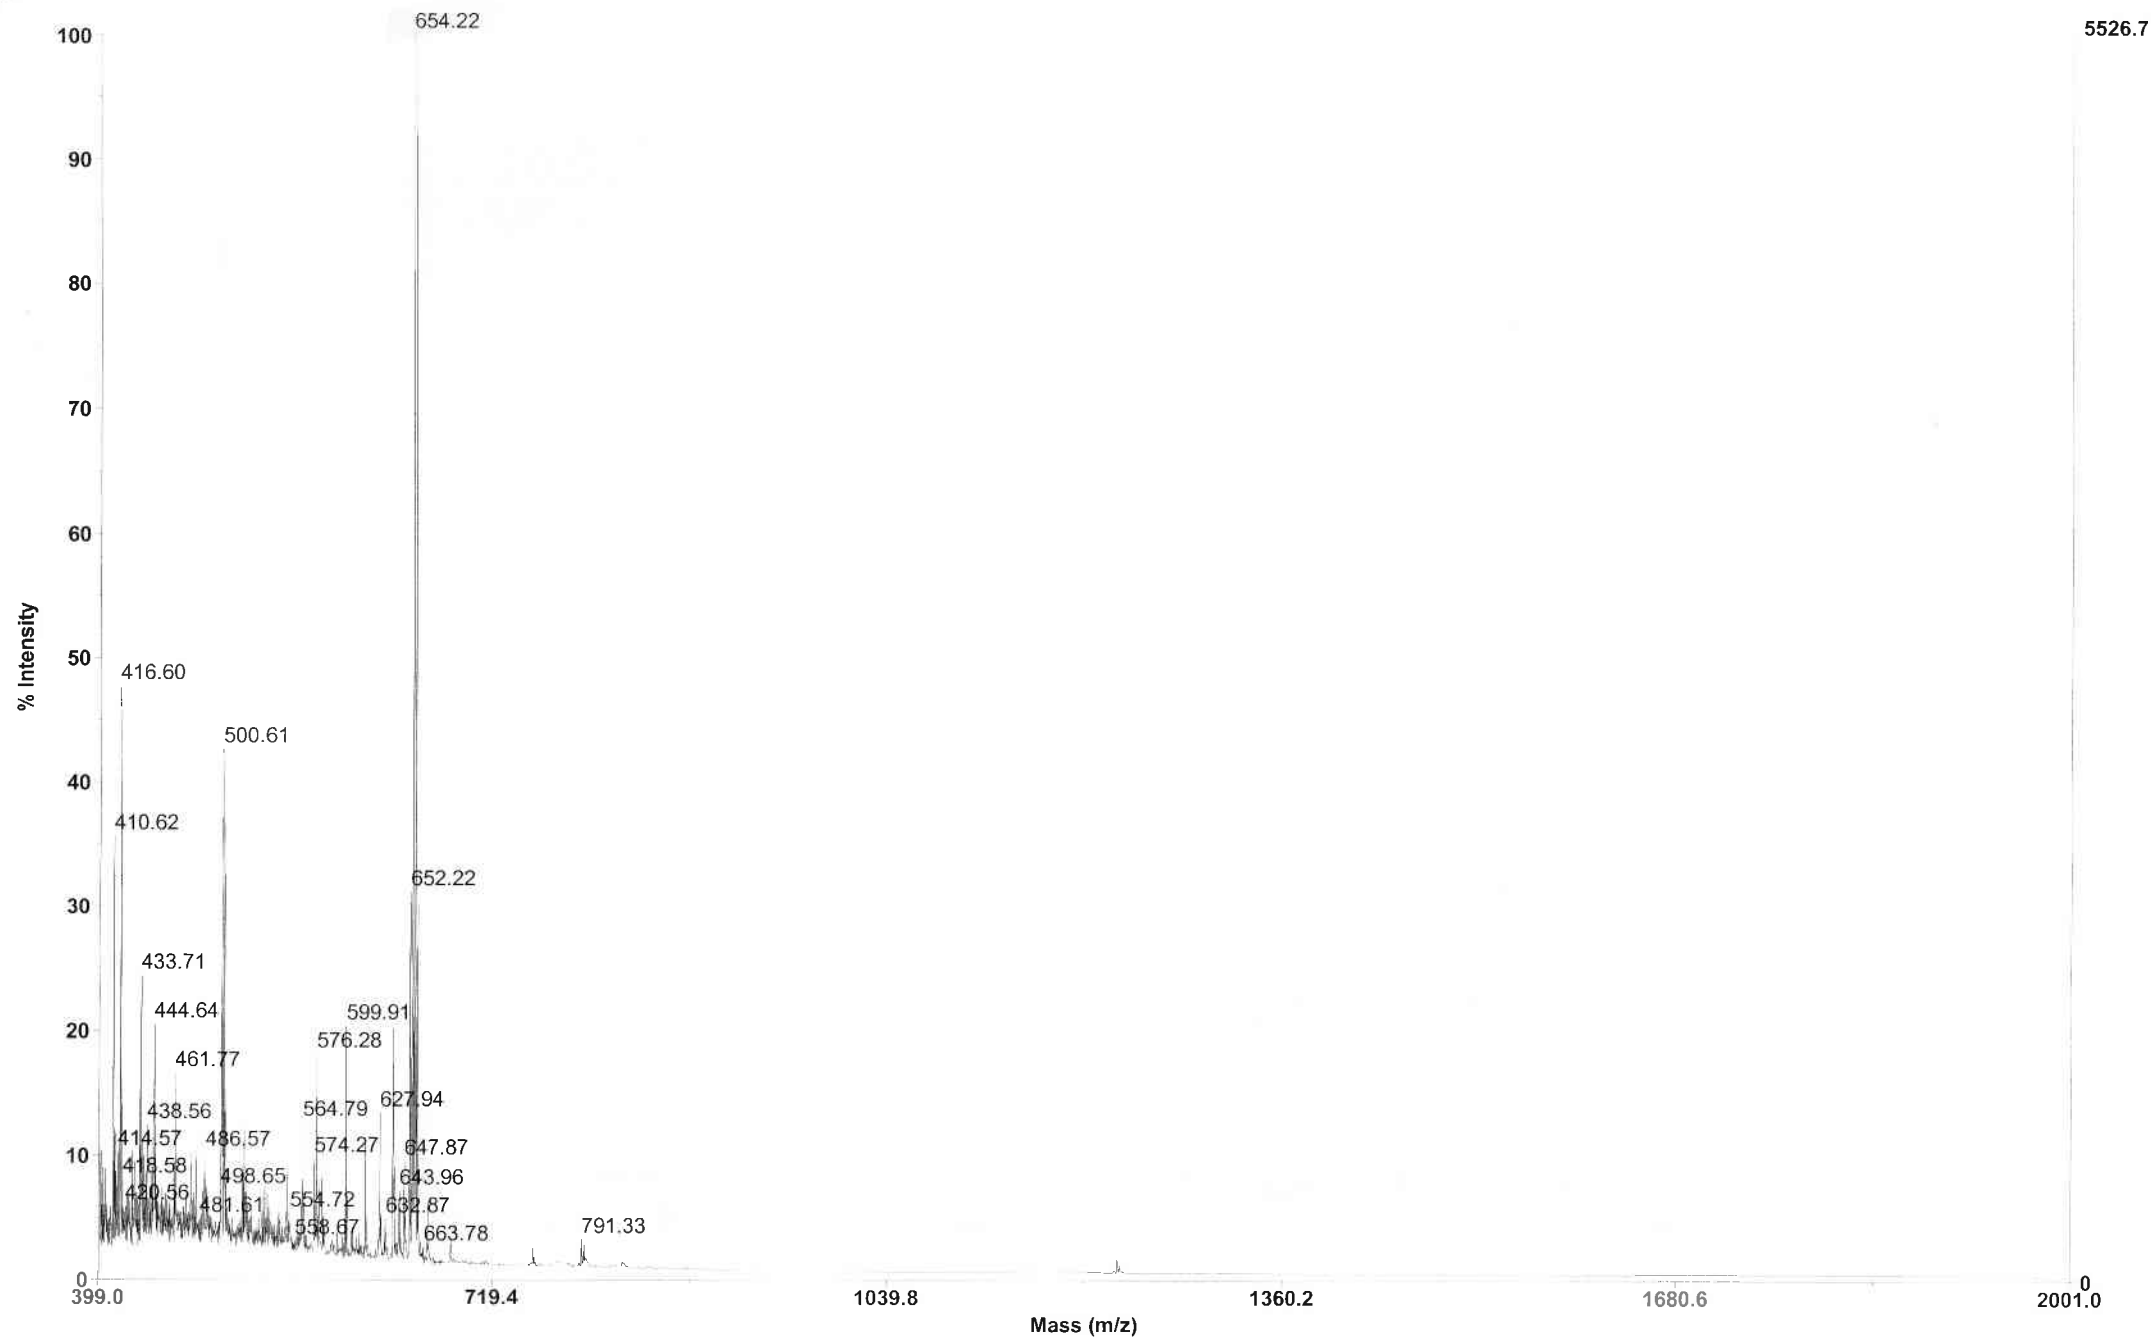

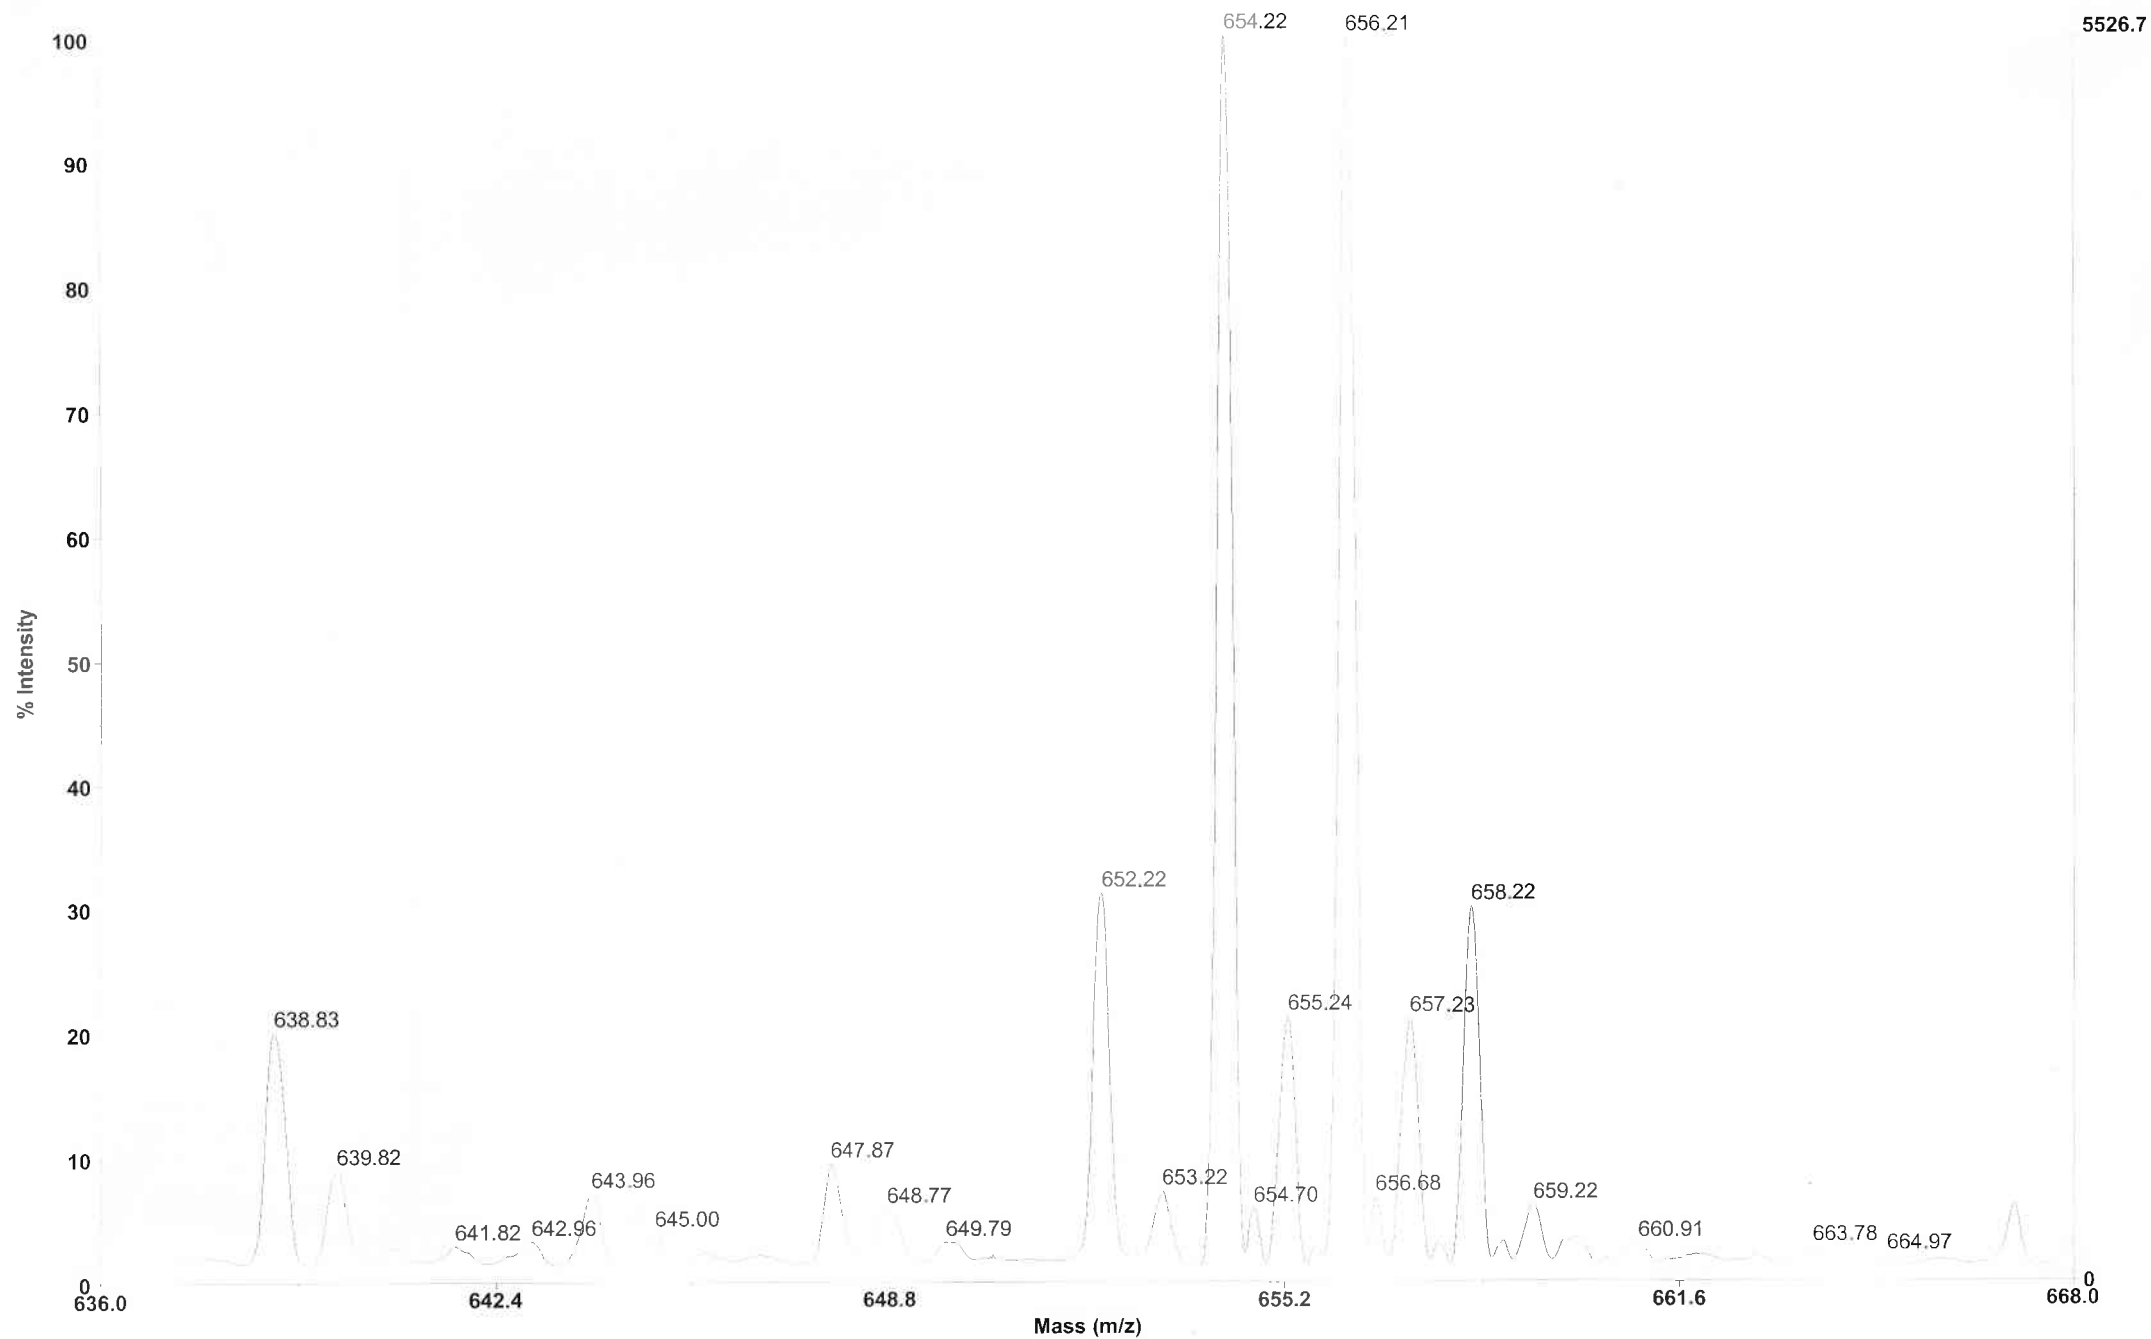

Supplement: c2ce06034e.zip [file 6-MS.pdf › 6-MS.pdf]

RT: 0.00 - 42.47

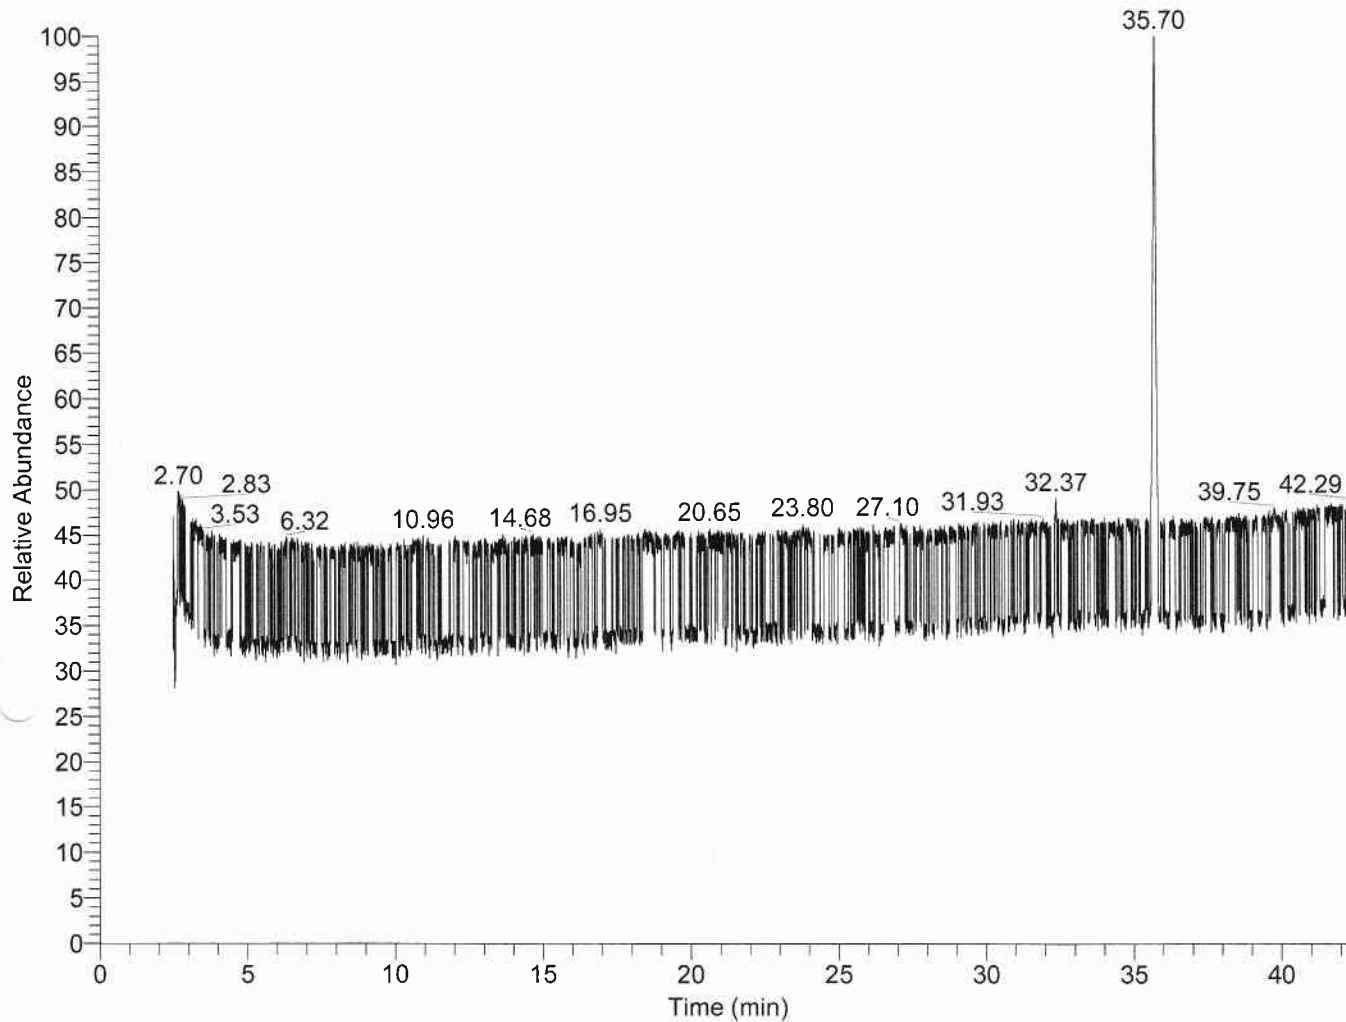

NL:  
1.35E5  
TIC MS  
BrTFPT\_09  
121516141  
3

BrTFPT\_091215161413 #4802 RT: 35.67 AV: 1 NL: 1.66E4

T: {0;0} + c EI det=350.00 Full ms [ 560.00-980.00]

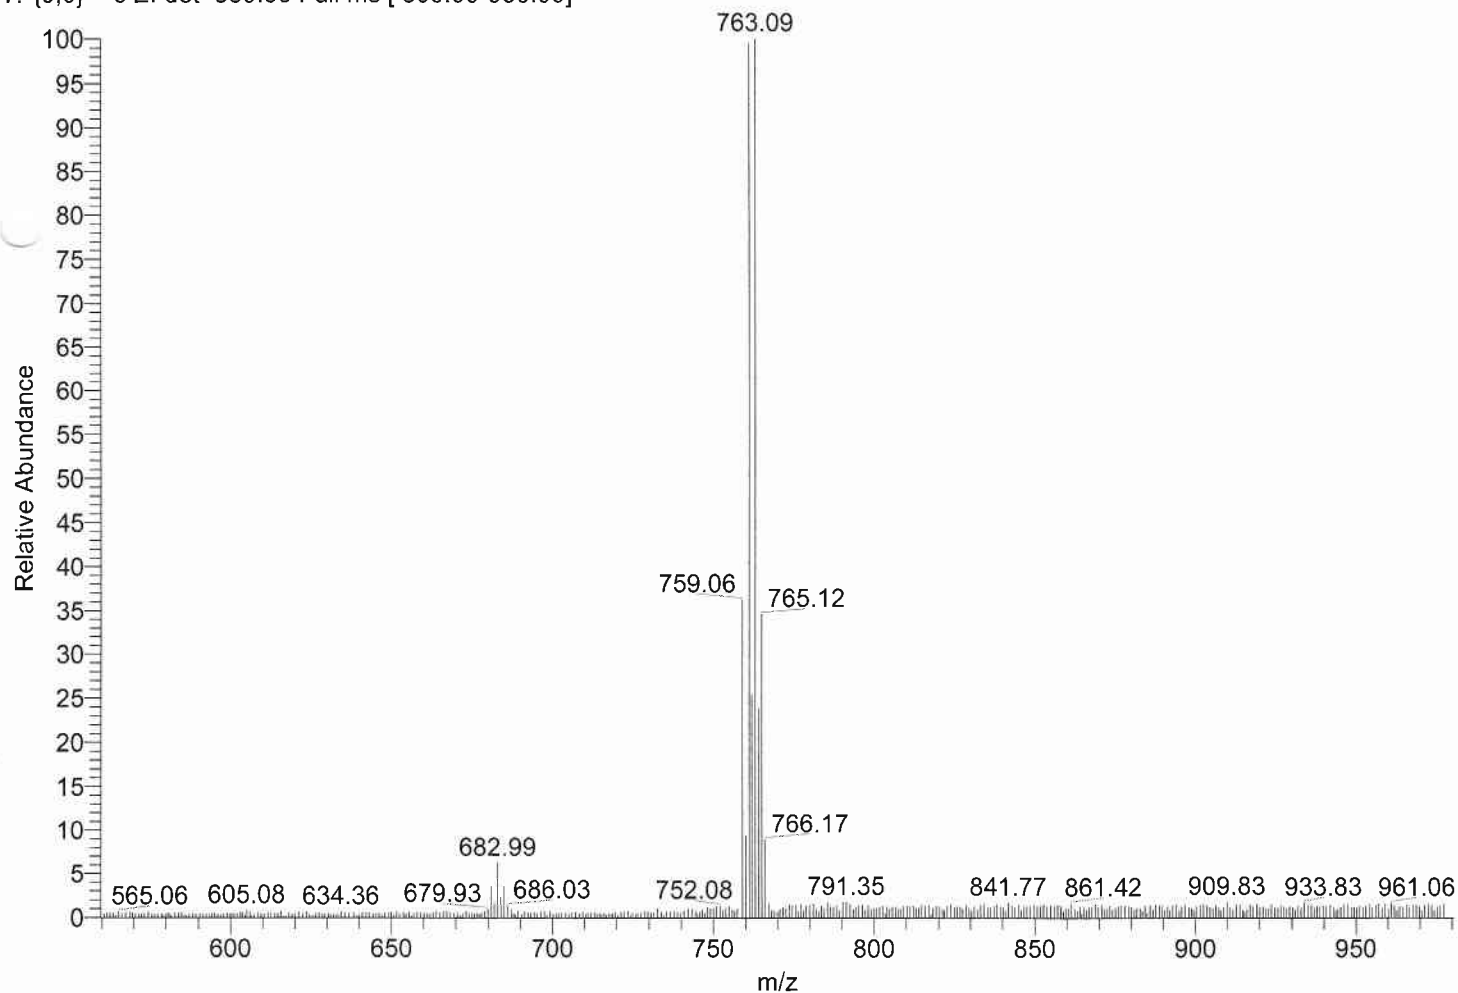

Supplement: c2ce06034e.zip [file 7-GC-MS.pdf › 7-GC-MS.pdf]

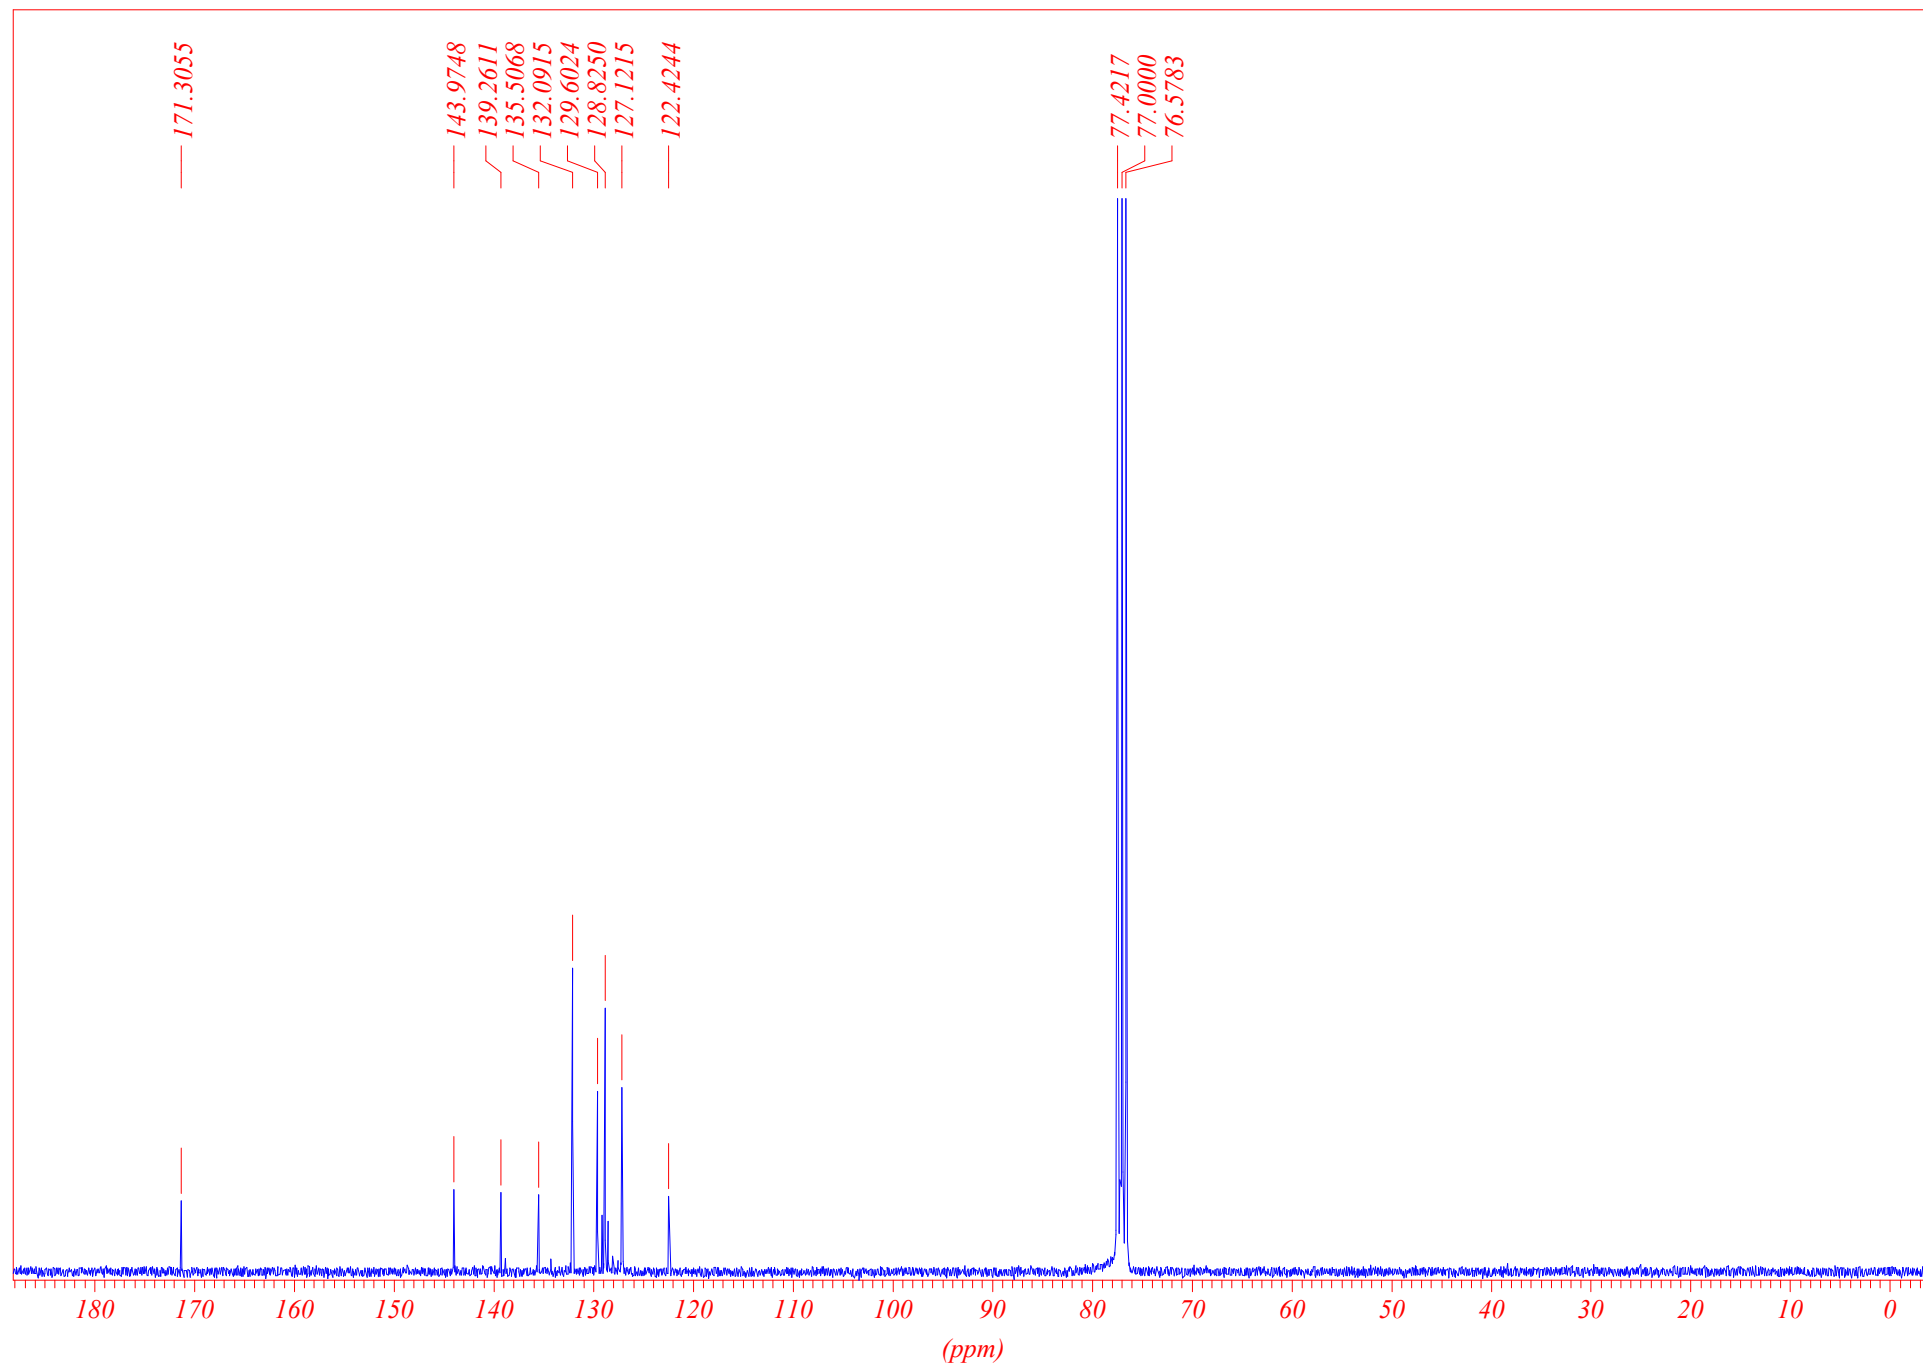

Supplement: c2ce06034e.zip [file 8-C-NMR.pdf › 8-C-NMR.pdf]

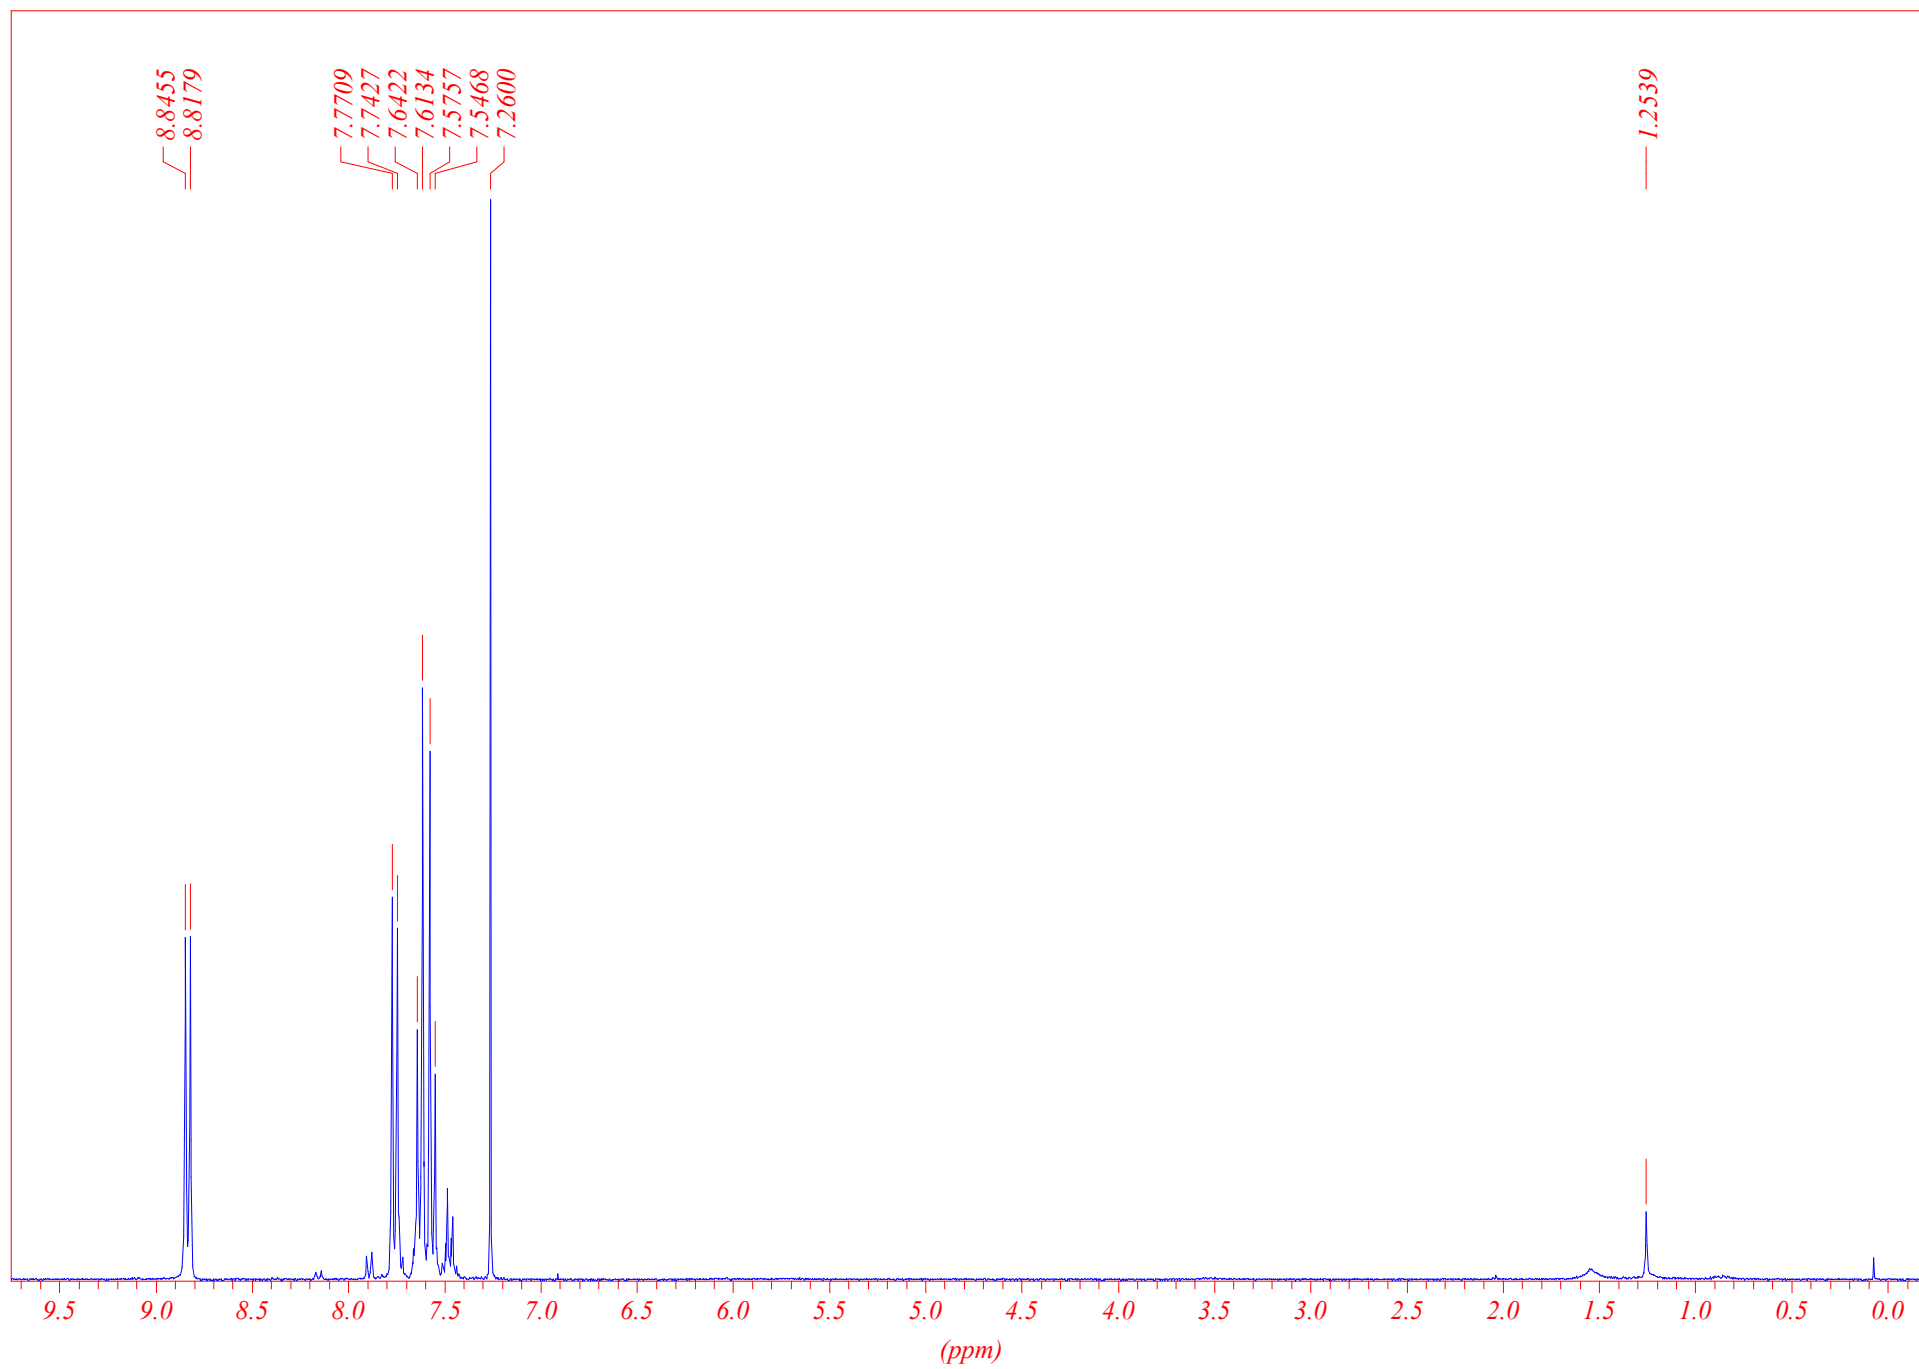

Supplement: c2ce06034e.zip [file 8-H-NMR.pdf › 8-H-NMR.pdf]

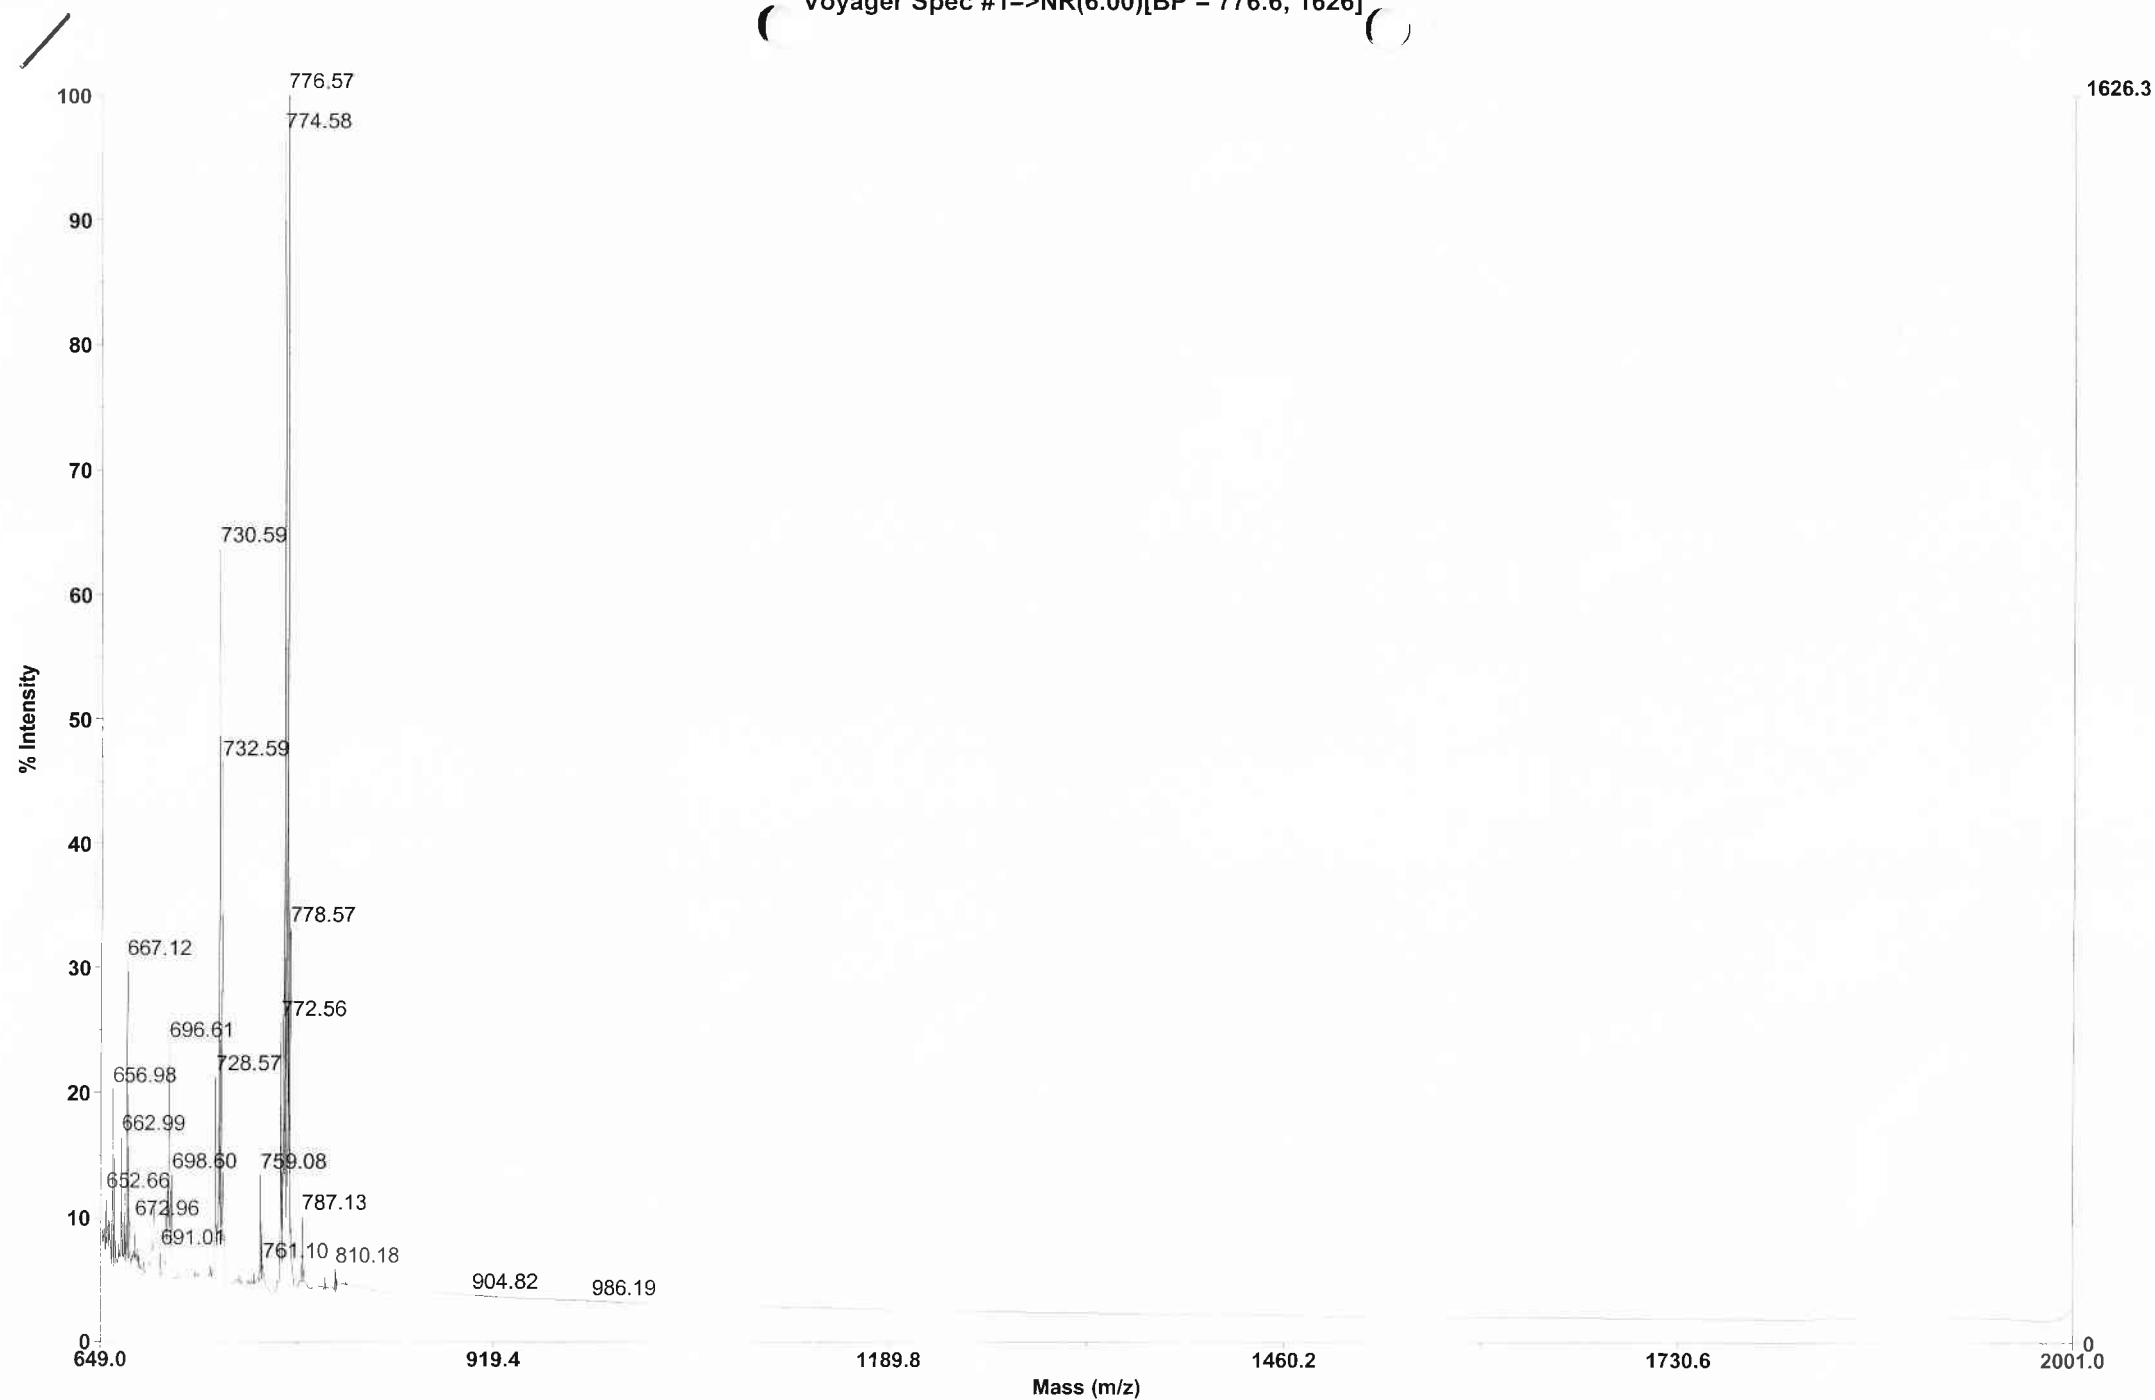

Voyager Spec #1=>NR(6.00)[BP = 776.6, 1626]

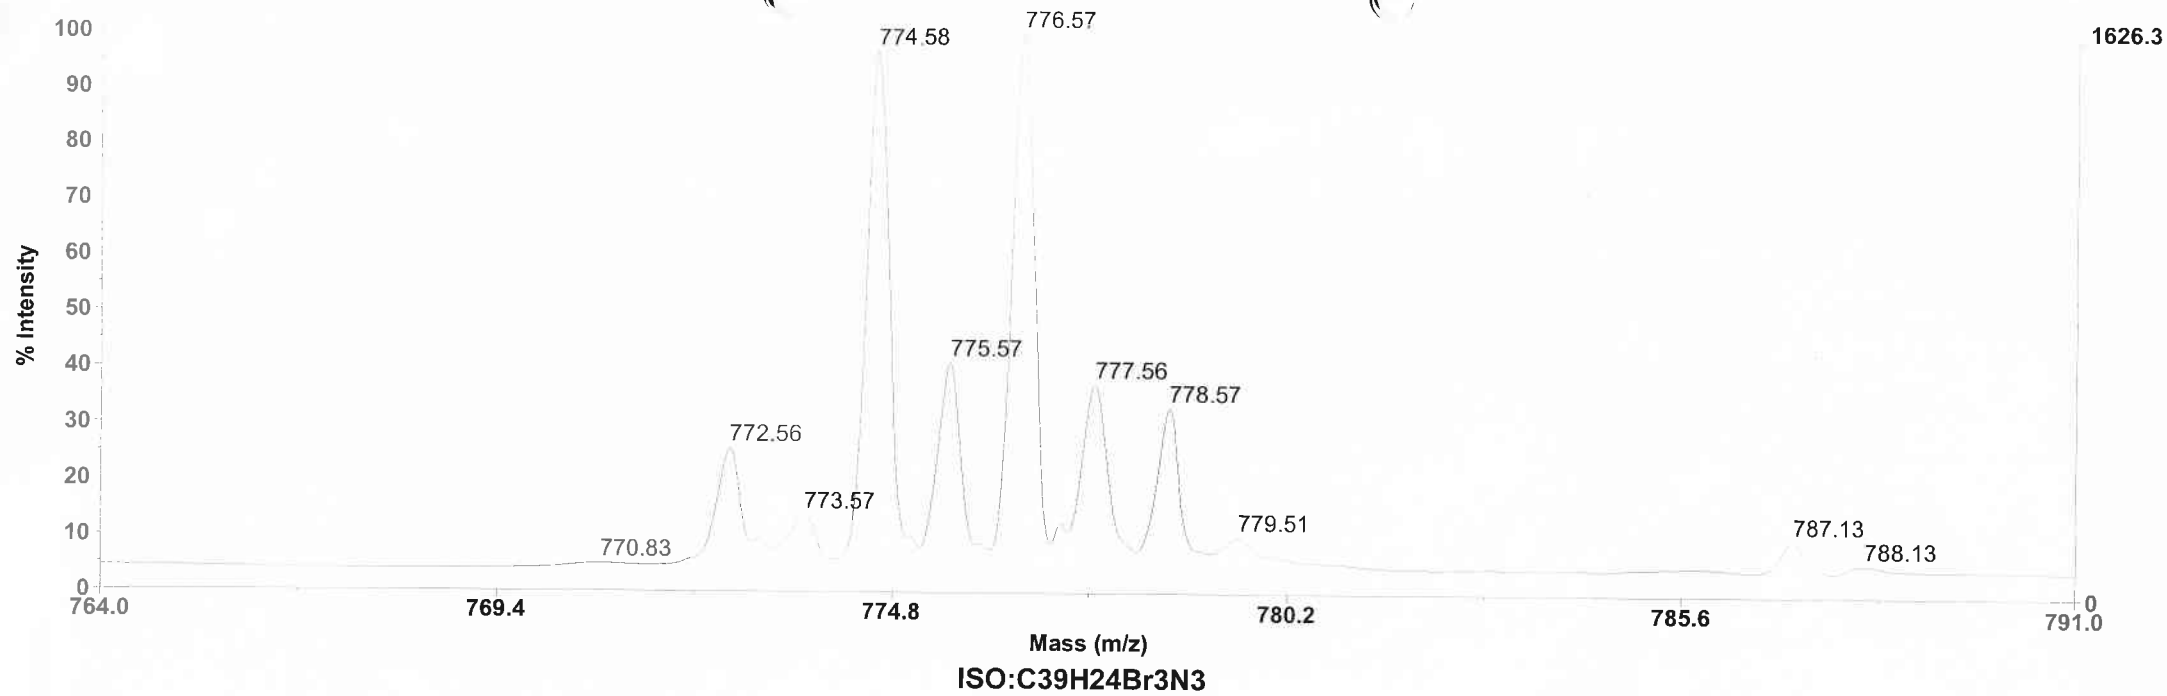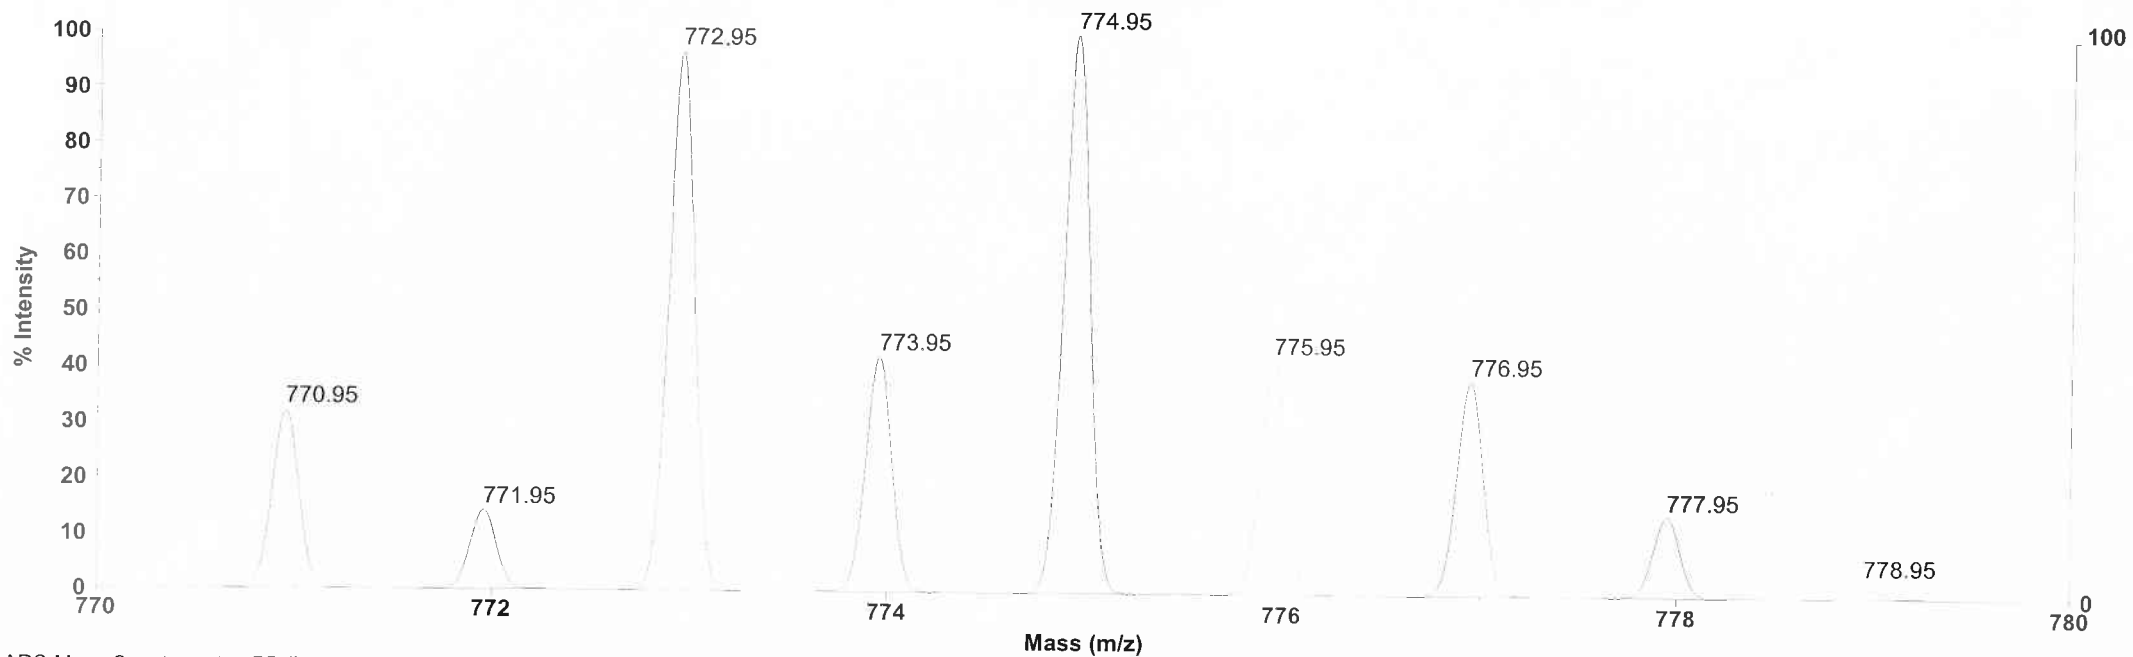

Supplement: c2ce06034e.zip [file 8-MS.pdf › 8-MS.pdf]

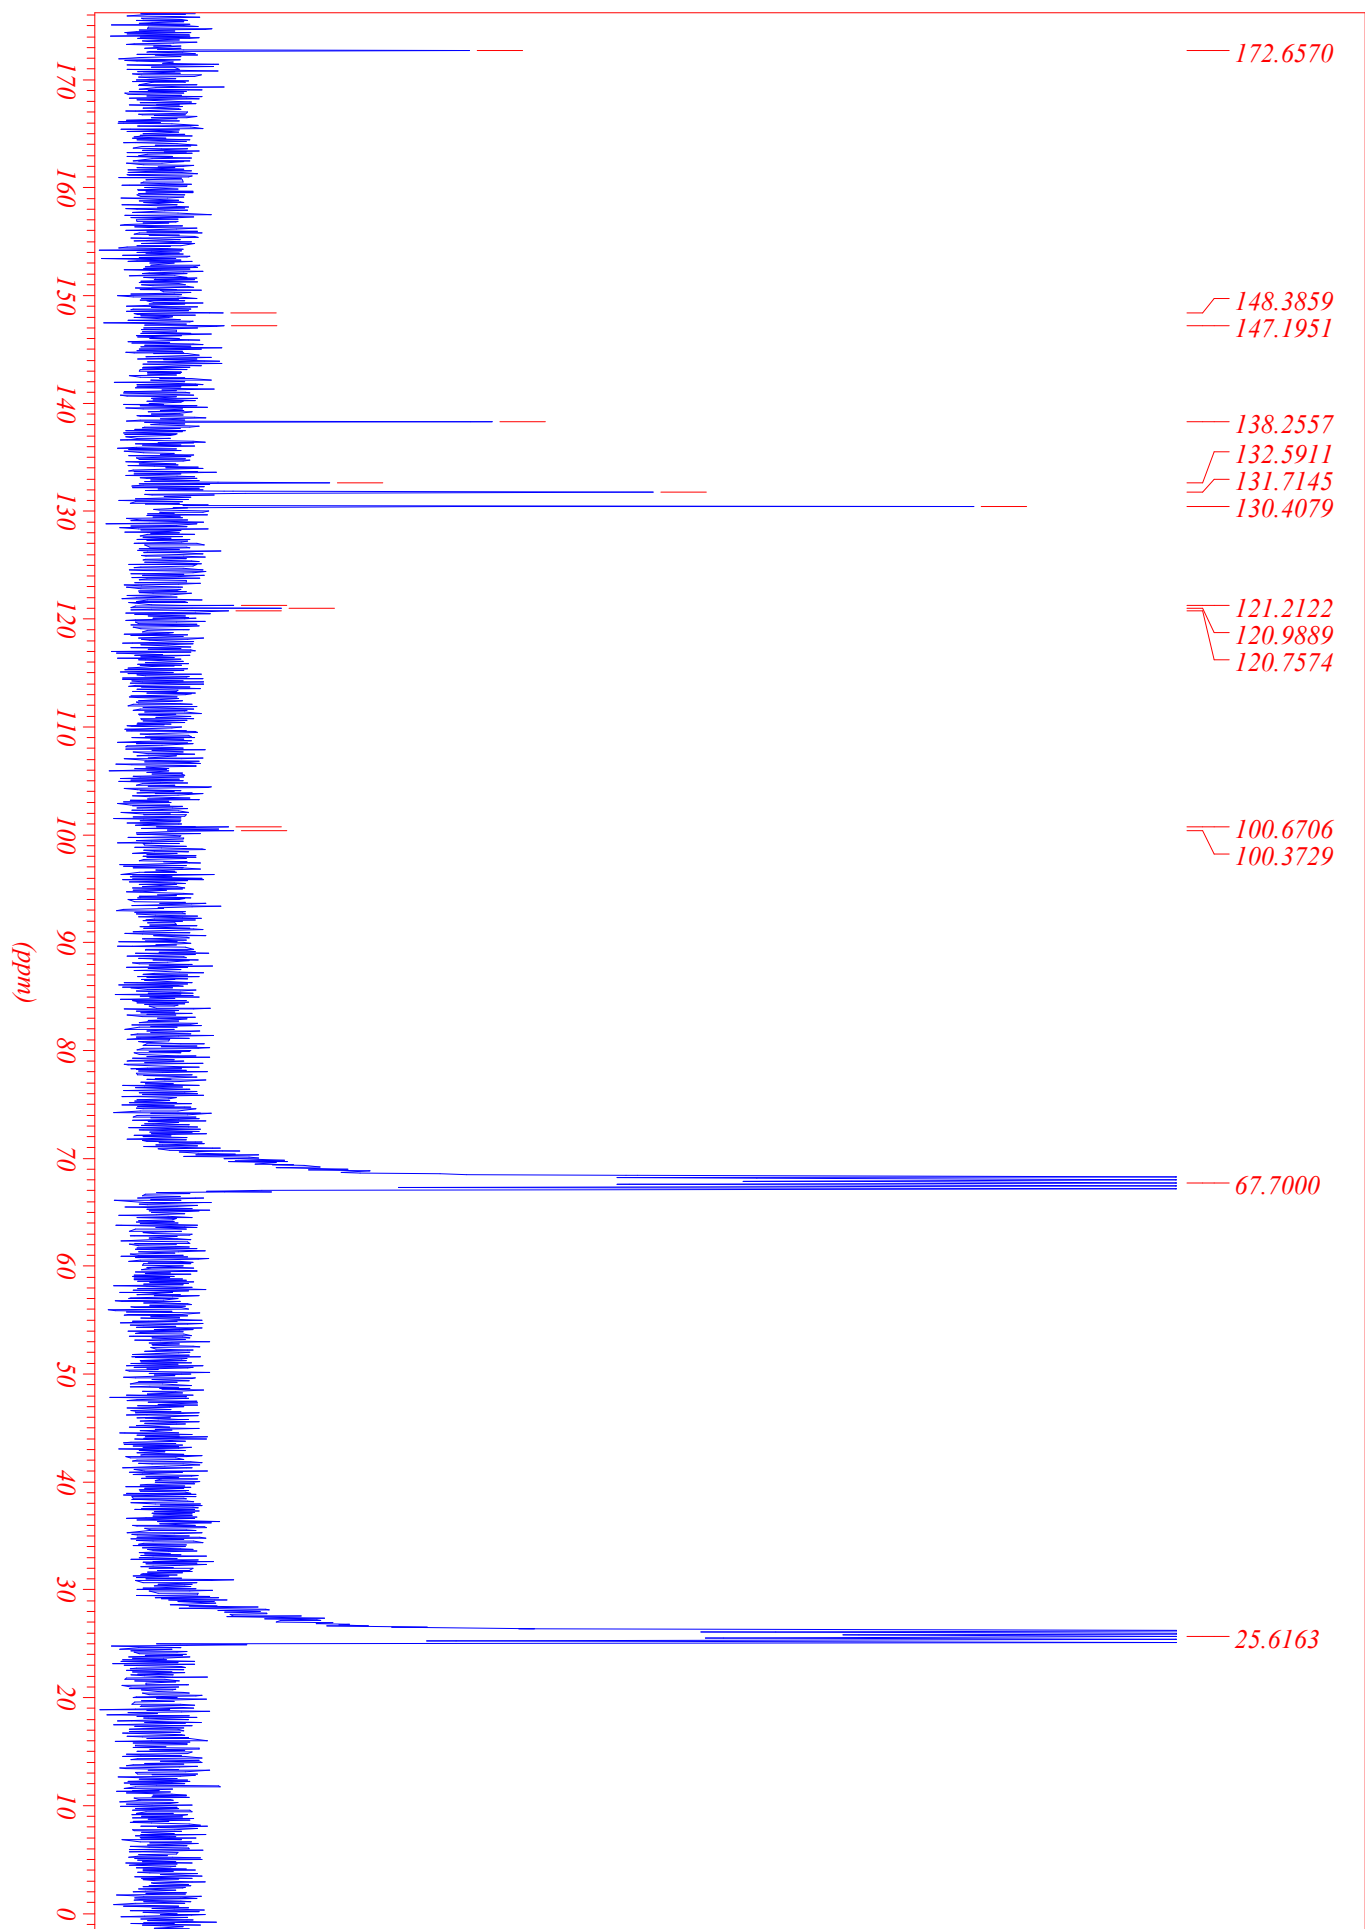

Supplement: c2ce06034e.zip [file 9-C-NMR.pdf › 9-C-NMR.pdf]

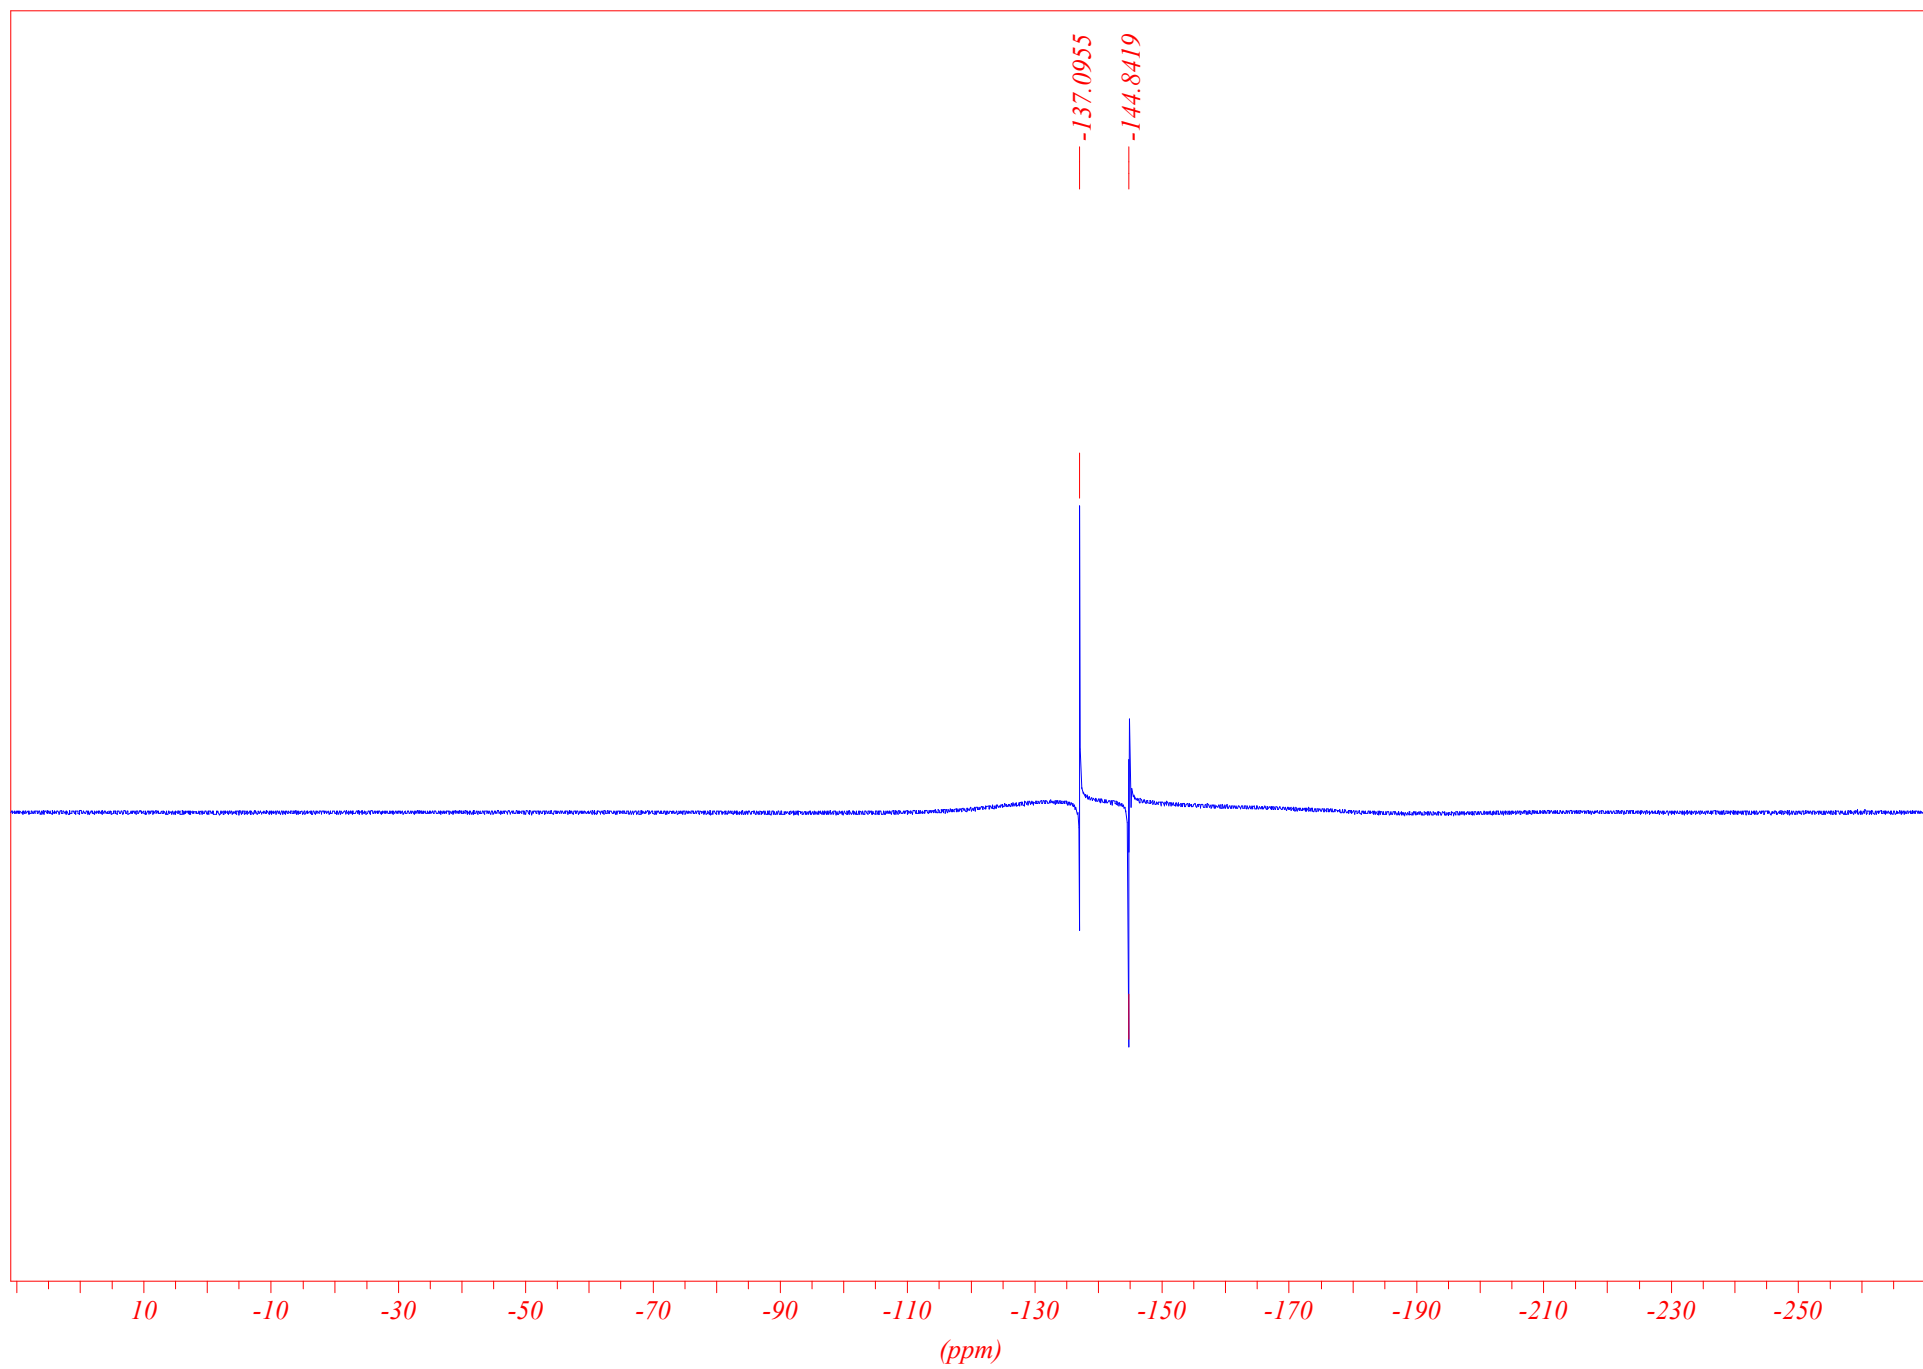

Supplement: c2ce06034e.zip [file 9-F-NMR.pdf › 9-F-NMR.pdf]

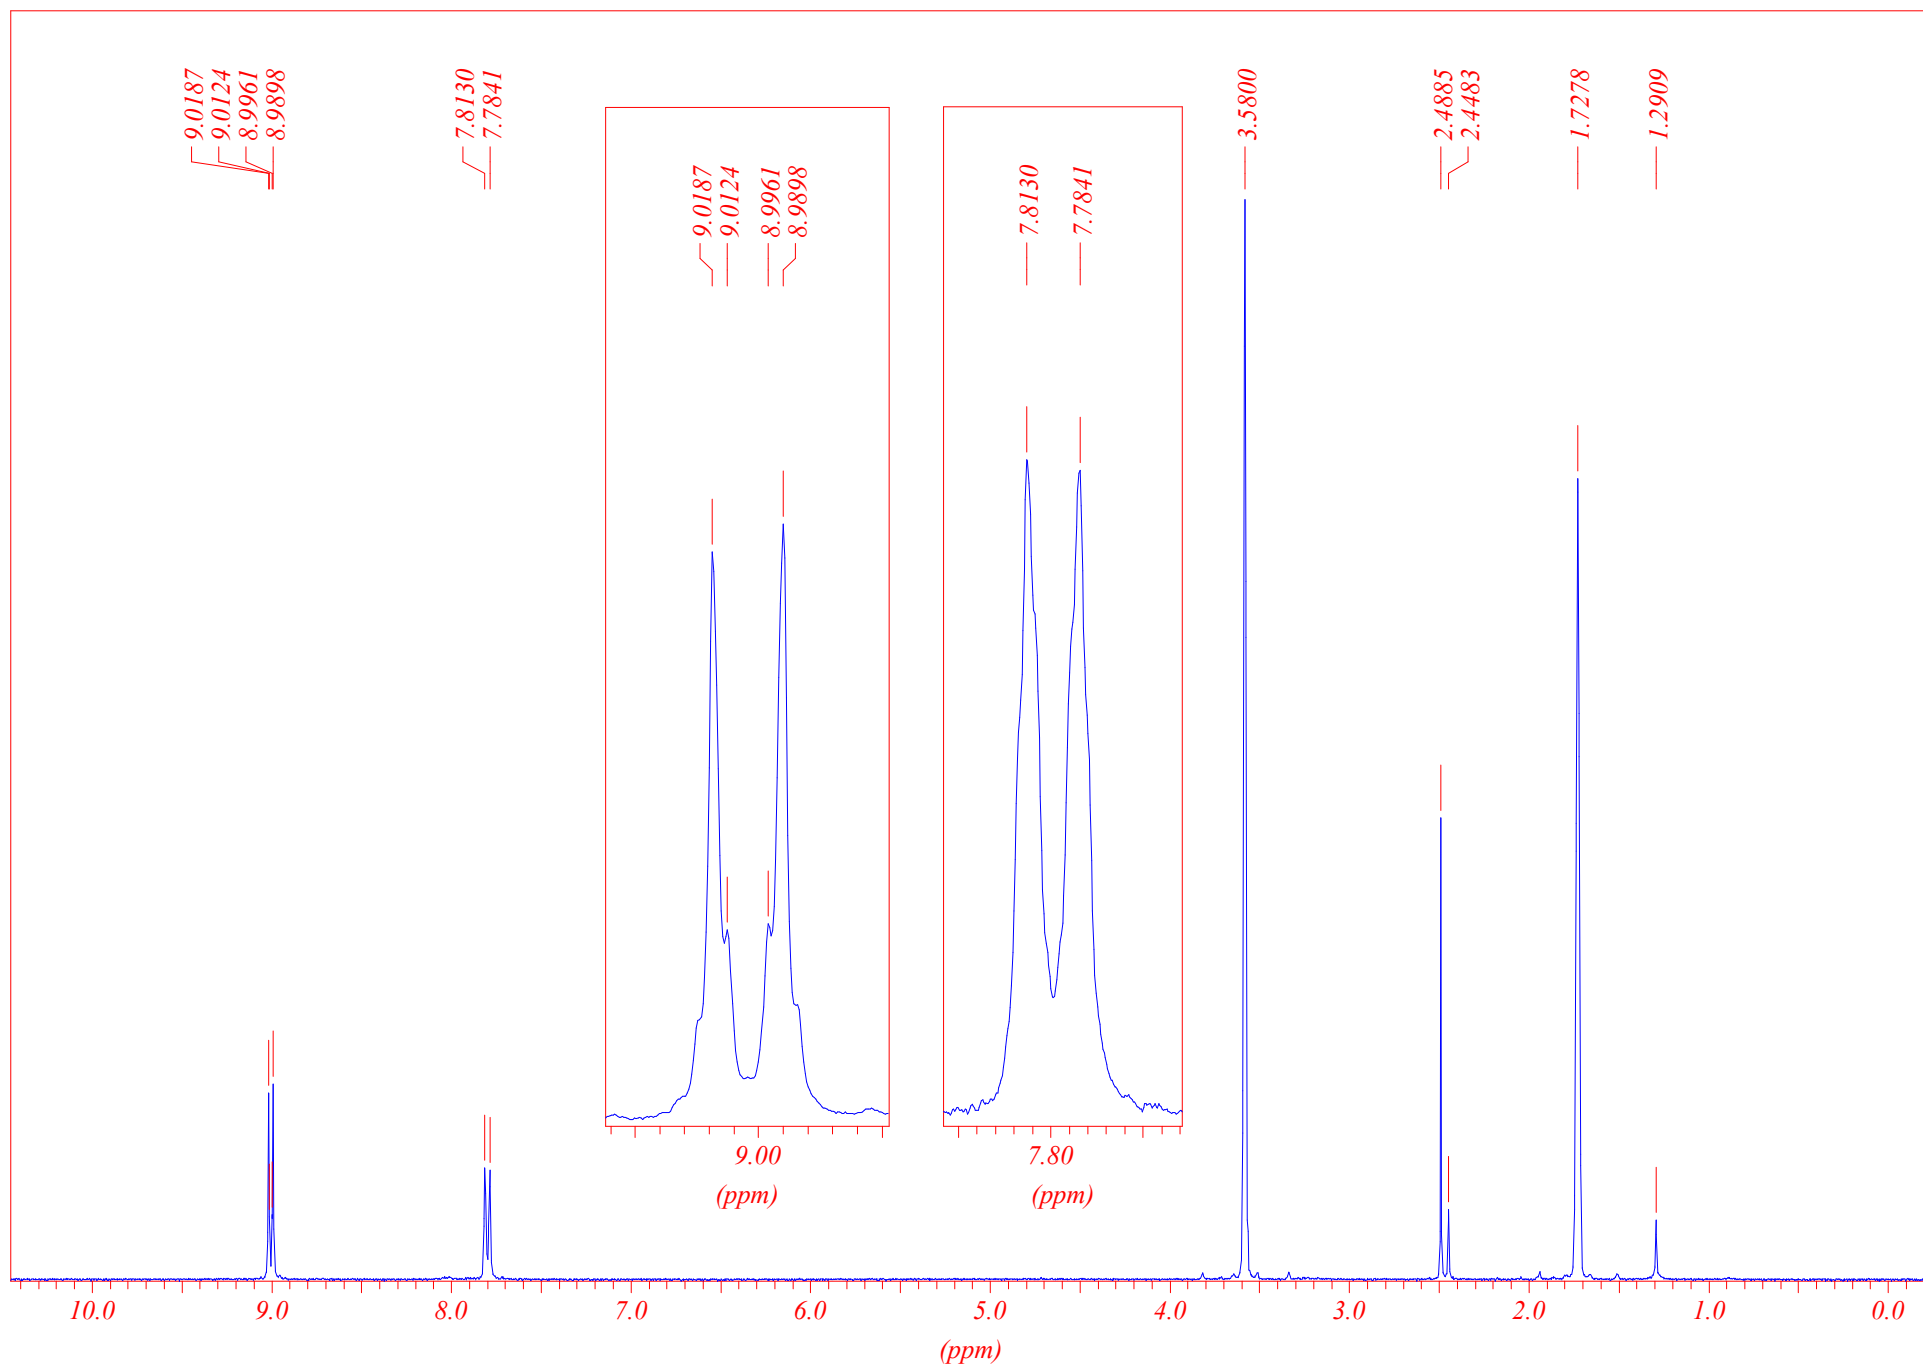

Supplement: c2ce06034e.zip [file 9-H-NMR.pdf › 9-H-NMR.pdf]

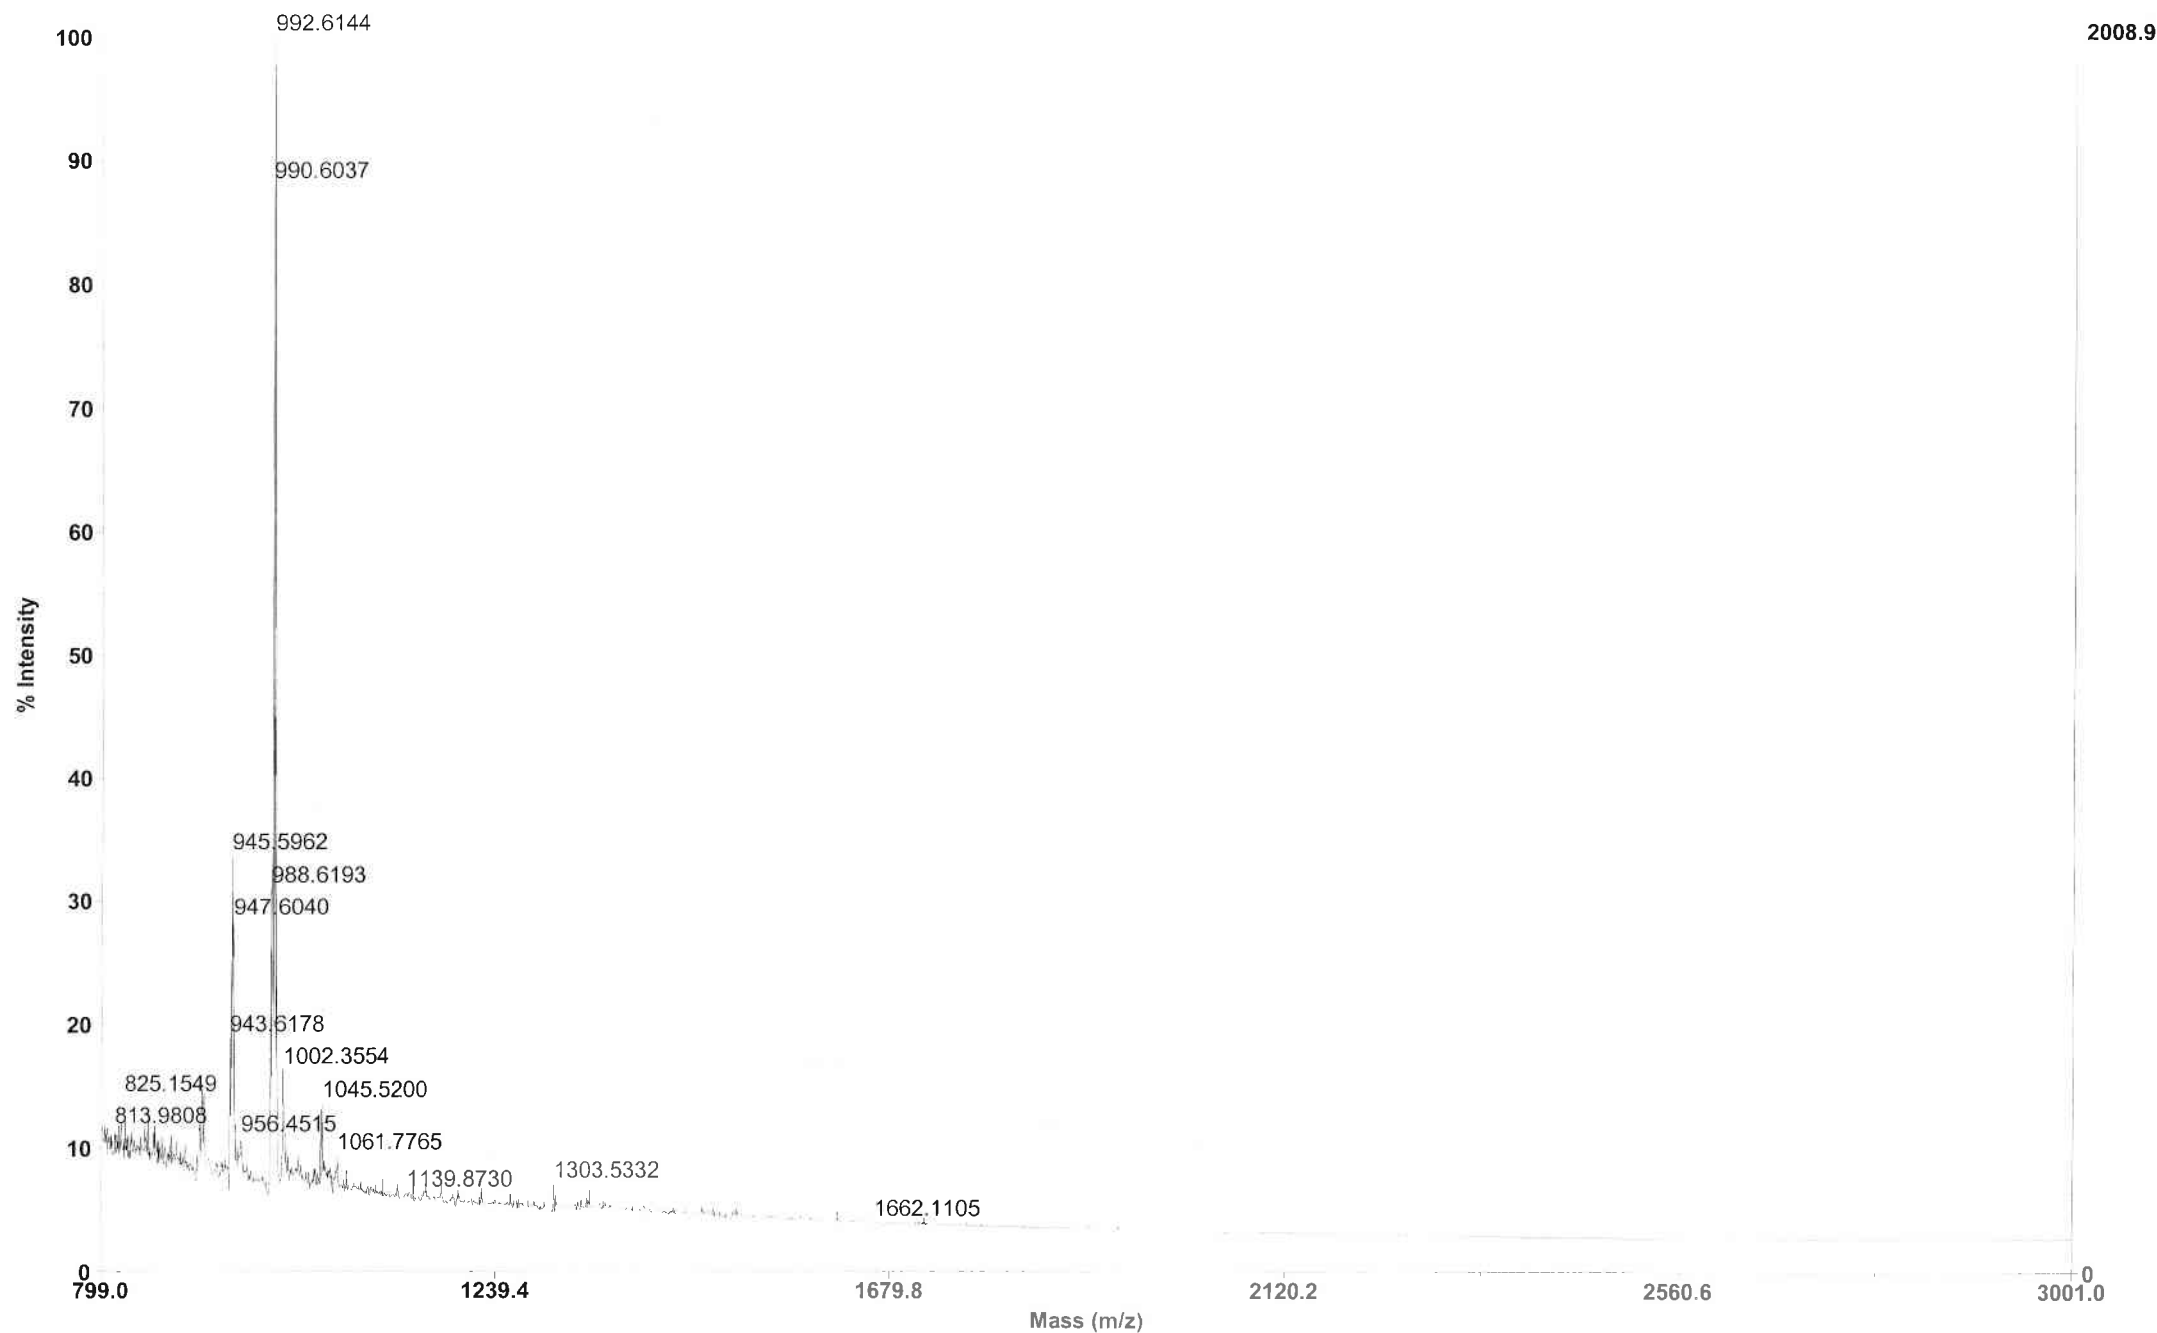

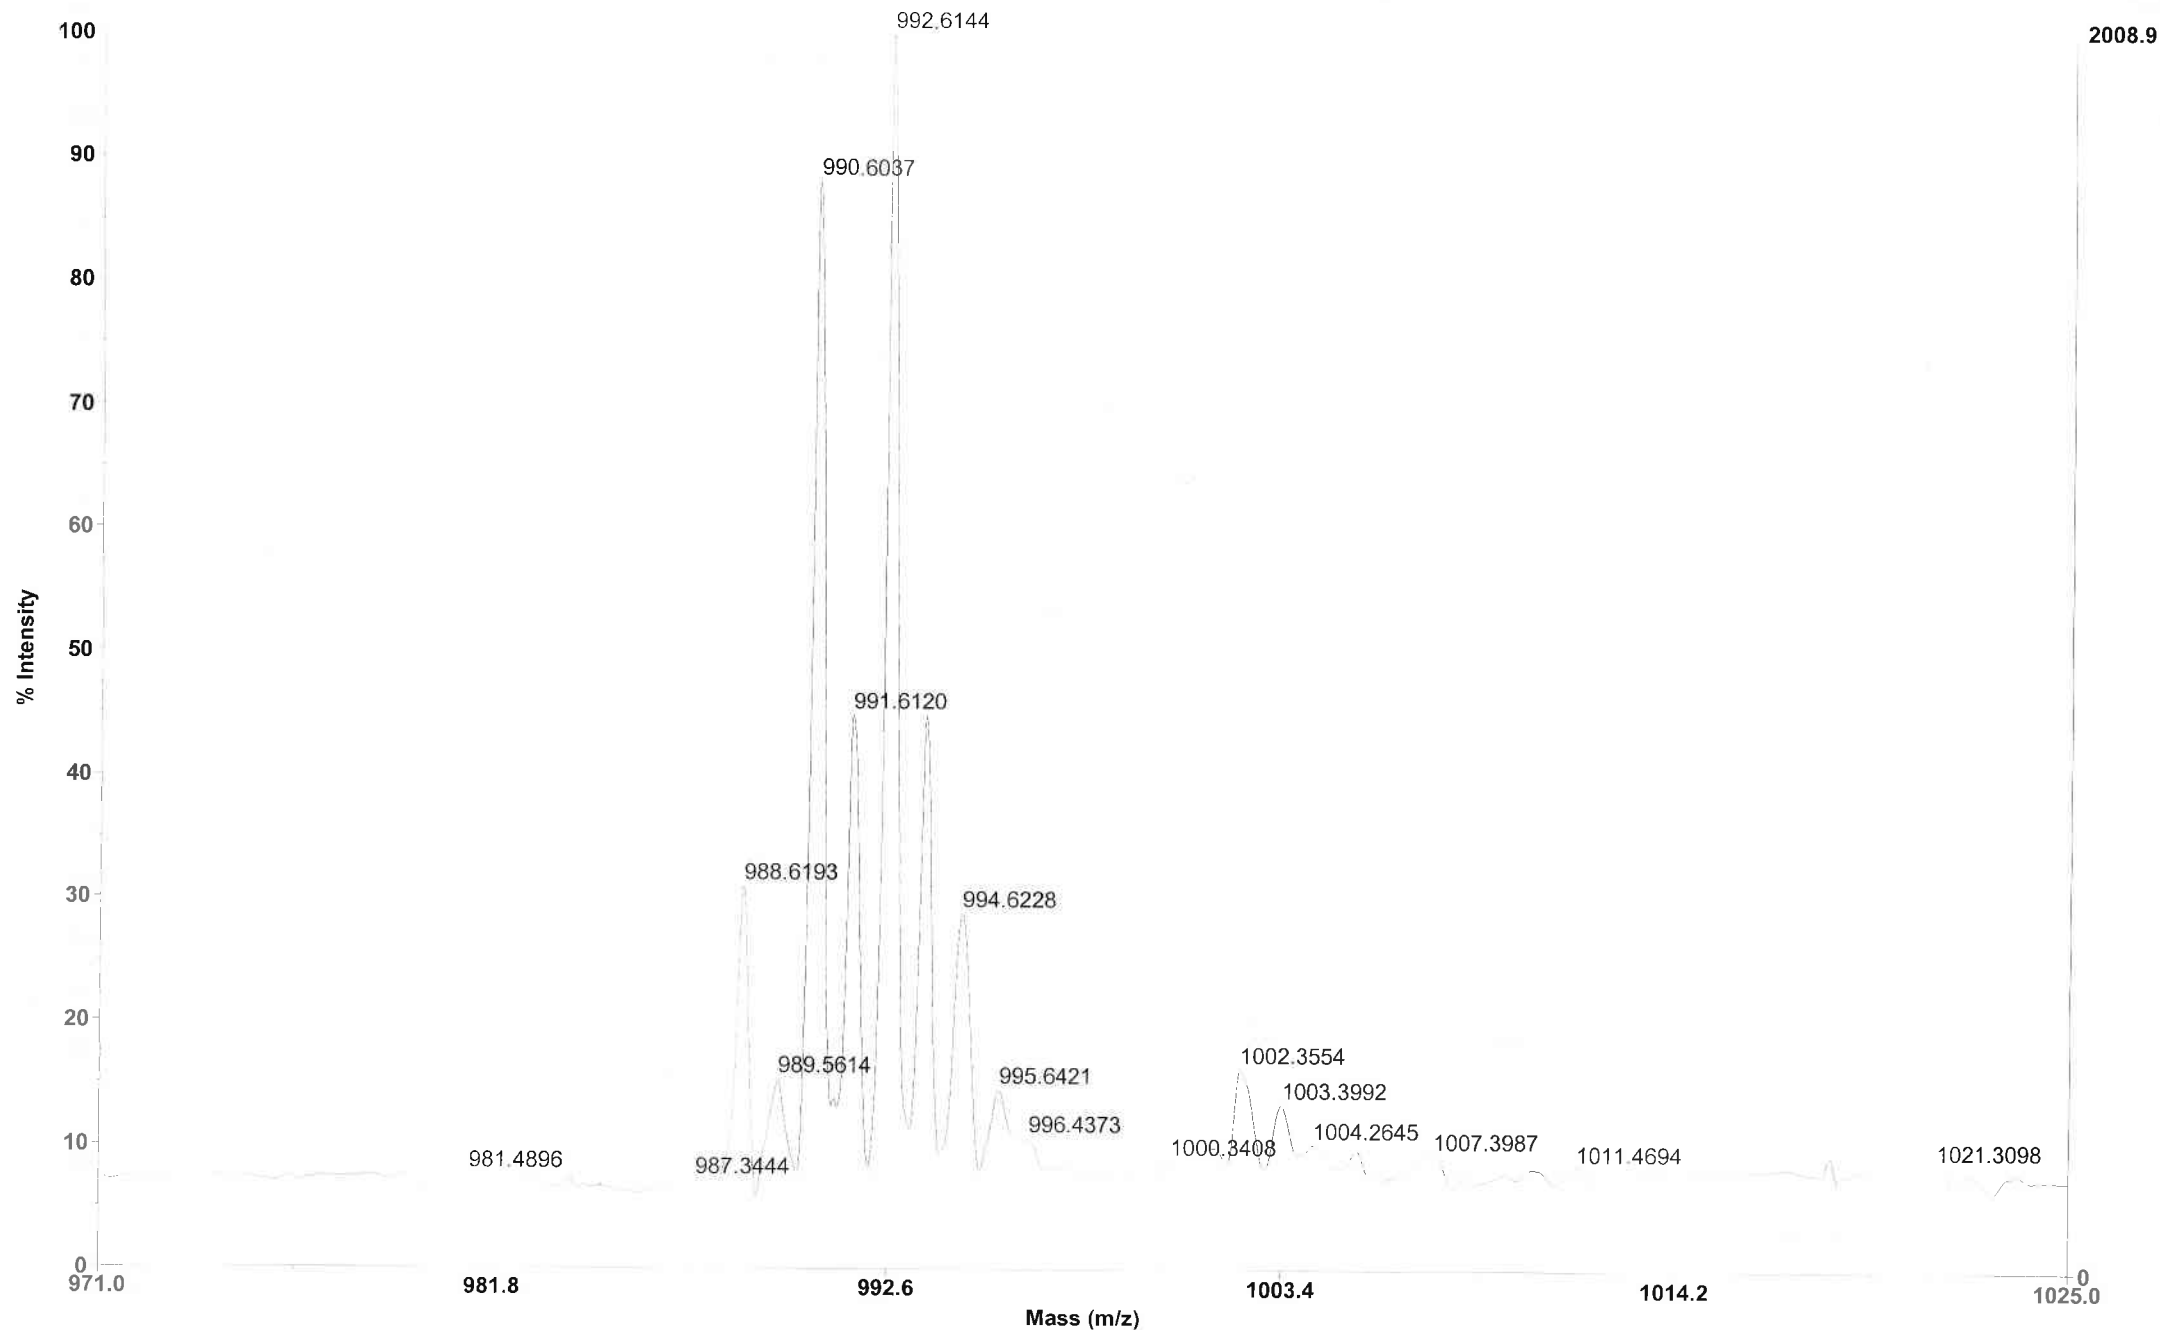

Supplement: c2ce06034e.zip [file 9-MS.pdf › 9-MS.pdf]
